# Supplementary material for: Chitosan reduces naturally occurring plant pathogenic fungi and increases nematophagous fungus Purpureocillium in soil under field conditions
Source: Frontiers journal article supplement (doi:10.3389/fagro.2024.1502402), 2025-01-22
Supplement: Table_3.xlsx [file Table_3.xlsx]

## Sheet: TS18_Network_metrics.ITS_V1V2
Node_ID	Label	Taxonomy	Group	Degree_centrality	Weighted_degree_centrality	Closeness_centrality	Betweeness_centrality	Keystone	Module_ID	Clustering_coefficient	Eigenvector_centrality
1	F.1196081	Talaromyces amestolkiae	FUNGI	12	3.95493	0.321576	0.003461	0.030754	13	0.121212	0.385141
2	F.2059318	Histoplasma mississippiense (nom. inval.)	FUNGI	9	2.8823	0.31895	0.001668	0.02901	1	0.277778	0.345377
3	F.293939	Aspergillus lentulus	FUNGI	12	2.84763	0.33933	0.003865	0.041729	10	0.106061	0.49609
4	F.393283	Pestalotiopsis fici	FUNGI	11	4.74933	0.33933	0.002556	0.047009	7	0.109091	0.533401
5	F.45130	Bipolaris sorokiniana	FUNGI	14	4.36637	0.339963	0.005421	0.043564	11	0.087912	0.5195
6	F.41047	Aspergillus thermomutatus	FUNGI	11	3.01245	0.339541	0.003457	0.036634	17	0.090909	0.437798
7	F.5210	Filobasidium floriforme	FUNGI	8	2.85461	0.311503	0.001584	0.023957	0	0.035714	0.290382
8	F.41068	Aspergillus campestris	FUNGI	11	3.97004	0.341022	0.003295	0.042592	5	0.109091	0.49508
9	F.1187941	Alternaria rosae	FUNGI	13	5.16371	0.342303	0.004277	0.049192	11	0.115385	0.567142
10	F.861299	Gemmatirosa kalamazoonensis	FUNGI	12	3.77625	0.330713	0.003651	0.039805	17	0.166667	0.473611
11	F.2675880	Fusarium flagelliforme	FUNGI	10	3.22078	0.328924	0.002705	0.029994	8	0.066667	0.361479
12	F.119953	Alternaria atra	FUNGI	11	3.04368	0.338281	0.003088	0.040344	12	0.090909	0.472412
13	F.38033	Chaetomium globosum	FUNGI	13	4.03664	0.348186	0.004945	0.043043	3	0.038462	0.503289
14	F.301207	Macroventuria anomochaeta	FUNGI	12	4.28268	0.326372	0.003044	0.036049	1	0.106061	0.433393
15	F.280754	Pochonia chlamydosporia	FUNGI	15	3.65419	0.354504	0.005883	0.055118	6	0.085714	0.644251
16	F.29898	Rhodotorula graminis	FUNGI	15	4.61775	0.339541	0.005477	0.048249	1	0.085714	0.575654
17	F.36050	Fusarium poae	FUNGI	13	4.74328	0.34511	0.004158	0.047811	5	0.102564	0.555765
18	F.5334	Schizophyllum commune	FUNGI	12	3.25877	0.342947	0.00409	0.040295	4	0.106061	0.477469
19	F.5341	Agaricus bisporus	FUNGI	14	3.76394	0.354275	0.005141	0.05524	9	0.065934	0.635541
20	F.51453	Trichoderma reesei	FUNGI	16	4.61861	0.361533	0.006063	0.067121	7	0.116667	0.764497
21	F.1093900	Thyridium curvatum	FUNGI	20	3.8874	0.375687	0.010367	0.088854	11	0.073684	1
22	F.5480	Candida parapsilosis	FUNGI	11	3.0363	0.330314	0.002755	0.03734	5	0.181818	0.441539
23	F.5481	Diutina rugosa	FUNGI	8	2.90882	0.308517	0.001228	0.023024	10	0.107143	0.278813
24	F.13684	Parastagonospora nodorum	FUNGI	17	4.8279	0.350866	0.007306	0.061381	11	0.110294	0.70979
25	F.796027	Sugiyamaella lignohabitans	FUNGI	13	4.33157	0.34511	0.004321	0.045962	8	0.064103	0.541974
26	F.5507	Fusarium oxysporum	FUNGI	11	4.25679	0.319883	0.002606	0.032499	1	0.127273	0.391916
27	F.40324	Stenotrophomonas maltophilia	FUNGI	9	2.29153	0.313827	0.00175	0.025305	10	0.111111	0.306573
28	F.5518	Fusarium graminearum	FUNGI	11	3.538	0.33703	0.002434	0.045378	3	0.181818	0.520325
29	F.33178	Aspergillus terreus	FUNGI	12	4.73597	0.334352	0.003217	0.042339	14	0.090909	0.492198
30	F.43433	Tricharina praecox	FUNGI	11	3.68595	0.343593	0.003244	0.042512	2	0.109091	0.490134
31	F.169388	Fusarium solani	FUNGI	13	3.35305	0.342517	0.004198	0.047569	1	0.153846	0.554127
32	F.92629	Metarhizium album	FUNGI	15	3.91073	0.346861	0.00555	0.055196	4	0.12381	0.636767
33	F.195108	Fusarium falciforme	FUNGI	10	3.06011	0.321009	0.001936	0.033574	1	0.177778	0.402511
34	F.45607	Wickerhamiella sorbophila	FUNGI	10	3.39336	0.327938	0.002186	0.035884	5	0.133333	0.425872
35	F.46681	Entamoeba dispar	FUNGI	11	4.07379	0.337238	0.003254	0.036106	6	0.054545	0.427131
36	F.655981	Pseudogymnoascus destructans	FUNGI	9	3.3663	0.323095	0.001847	0.028883	8	0.055556	0.341411
37	F.1220207	Aspergillus puulaauensis	FUNGI	12	3.16343	0.325983	0.003283	0.033178	12	0.151515	0.411282
38	F.746128	Aspergillus fumigatus	FUNGI	12	2.74747	0.331716	0.004255	0.032992	5	0.075758	0.407341
39	F.1463999	Botrytis sinoallii	FUNGI	12	3.90084	0.336615	0.003347	0.043532	10	0.106061	0.510835
40	F.1070780	Aspergillus affinis	FUNGI	14	3.69513	0.332523	0.004767	0.04094	11	0.10989	0.500026
41	F.2060973	Purpureocillium takamizusanense	FUNGI	13	4.449	0.340598	0.004336	0.04762	11	0.115385	0.554273
42	F.27337	Verticillium dahliae	FUNGI	10	3.16995	0.330713	0.002614	0.032809	5	0.066667	0.389377
43	F.2813651	Orbilia oligospora	FUNGI	8	2.34447	0.308517	0.001796	0.020622	16	0.071429	0.256802
44	F.152316	Truncatella angustata	FUNGI	11	3.17855	0.329717	0.002709	0.034567	2	0.163636	0.410186
45	F.60172	Penicillium solitum	FUNGI	16	5.78092	0.347964	0.005756	0.053248	7	0.116667	0.627471
46	F.1396493	Fimicolochytrium jonesii	FUNGI	13	4.40575	0.341235	0.004443	0.045213	1	0.064103	0.52574
47	F.73501	Cordyceps militaris	FUNGI	16	4.41536	0.344242	0.006161	0.049358	16	0.075	0.597723
48	F.588596	Rhizophagus irregularis	FUNGI	12	4.90365	0.339541	0.003927	0.040095	5	0.075758	0.471782
49	F.182096	Aspergillus chevalieri	FUNGI	12	3.69447	0.325983	0.003607	0.035489	5	0.075758	0.430154
50	F.4950	Torulaspora delbrueckii	FUNGI	11	2.64506	0.330713	0.003257	0.038661	1	0.109091	0.455529
51	F.37727	Talaromyces marneffei	FUNGI	9	4.32955	0.323286	0.002111	0.027445	13	0.055556	0.3323
52	F.1485682	Mitosporidium daphniae	FUNGI	11	3.65306	0.335377	0.003391	0.035475	7	0.036364	0.417101
53	F.231269	Fusarium coffeatum	FUNGI	11	3.58624	0.334761	0.003374	0.037989	9	0.109091	0.450688
54	F.749465	Boeremia exigua	FUNGI	14	4.15933	0.343593	0.004423	0.049405	3	0.142857	0.58688
55	F.1316788	Lachnellula hyalina	FUNGI	11	3.27219	0.329122	0.00292	0.037742	3	0.109091	0.450118
56	F.306088	Aspergillus steynii	FUNGI	13	3.0265	0.341022	0.003668	0.048586	14	0.115385	0.567273
57	F.76773	Malassezia globosa	FUNGI	13	3.31122	0.331917	0.003596	0.043082	17	0.141026	0.518498
58	F.76775	Malassezia restricta	FUNGI	13	3.09351	0.332725	0.004609	0.036861	9	0.115385	0.451521
59	B.45056	Legionella adelaidensis	BACTERIA_V1V2	14	3.49918	0.346422	0.004722	0.051125	13	0.142857	0.595668
60	B.1179673	Flavobacterium sp. KBS0721	BACTERIA_V1V2	12	4.13028	0.33912	0.004222	0.042322	17	0.045455	0.494195
61	B.45067	Legionella lansingensis	BACTERIA_V1V2	11	3.6392	0.330314	0.002461	0.039628	15	0.163636	0.459162
62	B.2596916	Frigoribacterium sp. NBH87	BACTERIA_V1V2	7	2.86366	0.307822	0.001283	0.018248	8	0.047619	0.225032
63	B.19	Syntrophotalea carbinolica	BACTERIA_V1V2	16	3.70087	0.35775	0.006391	0.060745	1	0.108333	0.706487
64	B.2760713	Lacibacter sp. S13-6-22	BACTERIA_V1V2	12	3.99236	0.330514	0.003439	0.03865	13	0.151515	0.465544
65	B.41	Stigmatella aurantiaca	BACTERIA_V1V2	11	2.59117	0.315274	0.002363	0.028776	5	0.127273	0.358331
66	B.94254	Dyadobacter fermentans	BACTERIA_V1V2	11	3.56116	0.326762	0.002818	0.03483	0	0.109091	0.421119
67	B.56	Sorangium cellulosum	BACTERIA_V1V2	12	3.40972	0.341235	0.003599	0.042874	15	0.075758	0.501652
68	B.1798224	Jiangella sp. DSM 45060	BACTERIA_V1V2	8	3.61526	0.322524	0.001577	0.026871	7	0.142857	0.318916
69	B.2175091	Flavobacterium album	BACTERIA_V1V2	11	3.19802	0.325402	0.002851	0.034246	3	0.145455	0.412208
70	B.1867846	Legionella clemsonensis	BACTERIA_V1V2	10	2.50494	0.320633	0.002149	0.033075	11	0.155556	0.391506
71	B.2502779	Pseudocnuella soli	BACTERIA_V1V2	10	2.72522	0.315638	0.002433	0.028286	17	0.133333	0.351975
72	B.94	Stella humosa	BACTERIA_V1V2	10	3.05112	0.322714	0.002036	0.03395	2	0.177778	0.403718
73	B.1532023	Qipengyuania sediminis	BACTERIA_V1V2	15	3.06216	0.341022	0.005216	0.046441	0	0.085714	0.563055
74	B.53358	Intrasporangium calvum	BACTERIA_V1V2	13	3.63425	0.33912	0.004471	0.042994	12	0.115385	0.515017
75	B.1413221	Streptomyces ferrugineus	BACTERIA_V1V2	11	2.9726	0.339541	0.003684	0.039689	0	0.109091	0.469311
76	B.2728020	Massilia forsythiae	BACTERIA_V1V2	15	2.81848	0.342517	0.004787	0.053591	5	0.12381	0.623828
77	B.2715735	Candidatus Chazhemtobacterium aquaticus	BACTERIA_V1V2	13	3.68626	0.341022	0.004886	0.041317	16	0.064103	0.498678
78	B.2719911	Nonlabens sp. SY33080	BACTERIA_V1V2	10	3.20849	0.333333	0.002519	0.037125	4	0.088889	0.424431
79	B.2904252	Lysobacter sp. KIS68-7	BACTERIA_V1V2	10	2.49964	0.321009	0.002551	0.028726	15	0.133333	0.353472
80	B.467094	Ilumatobacter coccineus	BACTERIA_V1V2	9	2.67071	0.31747	0.0018	0.026922	10	0.138889	0.330454
81	B.53399	Hyphomicrobium denitrificans	BACTERIA_V1V2	16	3.41923	0.344458	0.005772	0.054735	5	0.125	0.646149
82	B.49319	Rubrobacter xylanophilus	BACTERIA_V1V2	9	2.79085	0.326762	0.001784	0.035951	11	0.138889	0.413036
83	B.1069220	Mycolicibacillus koreensis	BACTERIA_V1V2	11	2.86818	0.336202	0.003238	0.03811	2	0.090909	0.444657
84	B.2498704	Agromyces sp. LHK192	BACTERIA_V1V2	12	3.8929	0.33703	0.003268	0.042647	10	0.075758	0.498238
85	B.2875540	Ferruginibacter albus	BACTERIA_V1V2	13	3.99484	0.349744	0.004321	0.050995	2	0.115385	0.590048
86	B.2822368	Lysobacter luteus	BACTERIA_V1V2	13	4.00519	0.330713	0.005198	0.036978	11	0.102564	0.452899
87	B.483547	Geoalkalibacter subterraneus	BACTERIA_V1V2	11	3.29308	0.326567	0.002836	0.033591	8	0.145455	0.408533
88	B.446683	Niabella soli	BACTERIA_V1V2	14	3.2687	0.350866	0.005726	0.046674	7	0.120879	0.555683
89	B.2732249	Gemmatimonas groenlandica	BACTERIA_V1V2	15	4.61077	0.350416	0.005647	0.056622	8	0.104762	0.655046
90	B.258	Sphingobacterium spiritivorum	BACTERIA_V1V2	12	3.46652	0.331917	0.003678	0.035087	17	0.106061	0.427245
91	B.2724135	Flavobacterium sp. CLA17	BACTERIA_V1V2	15	3.48658	0.34511	0.005169	0.049333	10	0.133333	0.585369
92	B.1548547	Woeseia oceani	BACTERIA_V1V2	10	3.34824	0.334761	0.003455	0.030988	8	0.022222	0.371248
93	B.287	Pseudomonas aeruginosa	BACTERIA_V1V2	11	3.72397	0.327938	0.002238	0.038602	7	0.218182	0.447053
94	B.86304	Saccharophagus degradans	BACTERIA_V1V2	11	2.66919	0.333333	0.002953	0.036166	6	0.090909	0.436038
95	B.254247	Aquicella siphonis	BACTERIA_V1V2	11	3.06658	0.337863	0.00319	0.03844	17	0.054545	0.450609
96	B.254246	Aquicella lusitana	BACTERIA_V1V2	12	3.06059	0.328529	0.003388	0.034441	16	0.136364	0.422346
97	B.294	Pseudomonas fluorescens	BACTERIA_V1V2	9	4.62375	0.328529	0.001943	0.033028	17	0.138889	0.389875
98	B.340268	Rhodopseudomonas sp. SK50-23	BACTERIA_V1V2	12	4.06122	0.341448	0.003577	0.04605	1	0.121212	0.529782
99	B.303	Pseudomonas putida	BACTERIA_V1V2	15	3.2983	0.350192	0.005486	0.056782	9	0.095238	0.655505
100	B.196914	Actinoplanes friuliensis	BACTERIA_V1V2	13	3.07183	0.342947	0.003902	0.048988	9	0.128205	0.571806
101	B.33075	Acidobacterium capsulatum	BACTERIA_V1V2	12	2.90673	0.339752	0.004034	0.042067	0	0.090909	0.497296
102	B.2973976	Pseudarthrobacter sp. NS4	BACTERIA_V1V2	17	4.59832	0.354734	0.007107	0.061917	9	0.117647	0.723975
103	B.316	Stutzerimonas stutzeri	BACTERIA_V1V2	10	3.14401	0.329916	0.00212	0.03815	9	0.088889	0.435983
104	B.2023772	Paenibacillus sp. RUD330	BACTERIA_V1V2	9	2.84816	0.321009	0.001809	0.028552	12	0.166667	0.339933
105	B.2879846	Streptomyces sp. ST13-2-2	BACTERIA_V1V2	11	4.39703	0.31895	0.002209	0.034325	0	0.181818	0.418546
106	B.639313	Hoyosella subflava	BACTERIA_V1V2	13	3.39801	0.342089	0.004567	0.044513	8	0.128205	0.523223
107	B.353	Azotobacter chroococcum	BACTERIA_V1V2	13	3.73847	0.342732	0.003116	0.045548	2	0.192308	0.543135
108	B.332158	Larkinella insperata	BACTERIA_V1V2	9	2.84112	0.323477	0.001566	0.033287	2	0.194444	0.387032
109	B.384	Rhizobium leguminosarum	BACTERIA_V1V2	12	3.8191	0.328134	0.003211	0.036989	16	0.121212	0.446389
110	B.2884022	Capillimicrobium parvum	BACTERIA_V1V2	11	3.69395	0.329122	0.002978	0.036724	3	0.054545	0.435422
111	B.94625	Brucella intermedia	BACTERIA_V1V2	15	3.55658	0.354275	0.006415	0.055993	6	0.095238	0.657453
112	B.2060726	Neorhizobium sp. SOG26	BACTERIA_V1V2	13	3.94441	0.346422	0.003519	0.052228	3	0.166667	0.601972
113	B.78258	Parascardovia denticolens	BACTERIA_V1V2	11	3.05661	0.330314	0.003296	0.035814	7	0.072727	0.427025
114	B.2589074	Nocardioides sambongensis	BACTERIA_V1V2	12	3.07795	0.33891	0.003125	0.045635	4	0.106061	0.525354
115	B.2789776	Actinomarinicola tropica	BACTERIA_V1V2	12	3.42735	0.336615	0.003645	0.042598	17	0.136364	0.501872
116	B.430522	Pedobacter steynii	BACTERIA_V1V2	12	3.4456	0.322904	0.004262	0.029718	0	0.060606	0.372077
117	B.1675686	Sulfurifustis variabilis	BACTERIA_V1V2	13	3.67282	0.331314	0.003663	0.041766	7	0.166667	0.495126
118	B.449	Legionella hackeliae	BACTERIA_V1V2	17	4.38629	0.35705	0.007509	0.062077	7	0.117647	0.723204
119	B.2994664	Frigoribacterium sp. SL97	BACTERIA_V1V2	12	3.79149	0.33849	0.003623	0.043138	2	0.106061	0.507283
120	B.454	Legionella israelensis	BACTERIA_V1V2	11	3.71611	0.328529	0.002203	0.03931	2	0.218182	0.467555
121	B.2908642	Solicola gregarius	BACTERIA_V1V2	12	3.01763	0.331716	0.002862	0.04097	11	0.136364	0.479685
122	B.37332	Nocardia seriolae	BACTERIA_V1V2	13	4.1198	0.340174	0.004407	0.047261	5	0.102564	0.550445
123	B.2576891	Nibricoccus aquaticus	BACTERIA_V1V2	9	3.72905	0.338072	0.002185	0.036693	6	0.111111	0.425391
124	B.332249	Truepera radiovictrix	BACTERIA_V1V2	17	5.28092	0.356352	0.007662	0.061081	9	0.117647	0.710603
125	B.324057	Paenibacillus sp. JDR-2	BACTERIA_V1V2	13	3.11388	0.342732	0.004501	0.045029	3	0.051282	0.534002
126	B.1892855	Sphingosinicella sp. BN140058	BACTERIA_V1V2	12	3.26053	0.335583	0.004177	0.035125	0	0.121212	0.429873
127	B.2732487	Usitatibacter palustris	BACTERIA_V1V2	11	3.44404	0.324437	0.002026	0.03668	17	0.236364	0.437802
128	B.131568	Kineococcus radiotolerans	BACTERIA_V1V2	13	4.0675	0.343162	0.003327	0.053158	7	0.179487	0.60652
129	B.188932	Pedobacter cryoconitis	BACTERIA_V1V2	9	3.34251	0.326958	0.002045	0.029442	12	0.111111	0.353373
130	B.2933290	Agrococcus sp. SCSIO52902	BACTERIA_V1V2	13	3.43748	0.34081	0.004281	0.04718	9	0.115385	0.552001
131	B.2781734	Streptomyces sp. A2-16	BACTERIA_V1V2	14	4.45969	0.357283	0.004897	0.058961	9	0.142857	0.676464
132	B.2949664	Paraconexibacter antarcticus	BACTERIA_V1V2	11	2.98023	0.313647	0.002648	0.030151	16	0.145455	0.372625
133	B.1544730	Kribbella qitaiheensis	BACTERIA_V1V2	12	3.61613	0.326762	0.002461	0.042392	11	0.181818	0.49904
134	B.2708020	Legionella antarctica	BACTERIA_V1V2	12	3.78797	0.341875	0.003637	0.042776	1	0.136364	0.499683
135	B.393765	Candidatus Endoriftia persephone	BACTERIA_V1V2	11	2.77055	0.331314	0.00322	0.033292	17	0.145455	0.406315
136	B.3015177	Phenylobacterium sp. NIBR 498073	BACTERIA_V1V2	14	3.15348	0.349744	0.004511	0.05517	13	0.142857	0.637641
137	B.2736640	Pseudonocardia broussonetiae	BACTERIA_V1V2	11	2.7796	0.32386	0.002796	0.031091	14	0.181818	0.390466
138	B.2613773	Sinorhizobium sp. BG8	BACTERIA_V1V2	12	4.3108	0.33849	0.003701	0.040914	2	0.090909	0.480386
139	B.2949635	Alkaliflexus sp. Ai-910	BACTERIA_V1V2	12	3.48601	0.346422	0.004009	0.044543	0	0.090909	0.520678
140	B.584	Proteus mirabilis	BACTERIA_V1V2	9	2.337	0.309564	0.001727	0.025077	12	0.138889	0.3088
141	B.152142	Mycolicibacterium holsaticum	BACTERIA_V1V2	12	2.95542	0.341022	0.004367	0.03958	17	0.106061	0.473852
142	B.2736757	Nocardioides campestrisoli	BACTERIA_V1V2	17	3.68079	0.344675	0.006734	0.053832	2	0.132353	0.64629
143	B.352858	Bacillus sp. Y1	BACTERIA_V1V2	11	3.05233	0.332119	0.002952	0.036689	17	0.163636	0.440356
144	B.45663	Desulfohalobium retbaense	BACTERIA_V1V2	11	3.71958	0.332523	0.002892	0.038423	2	0.127273	0.451307
145	B.889453	Alkalitalea saponilacus	BACTERIA_V1V2	12	3.96915	0.334761	0.003156	0.041636	8	0.121212	0.491499
146	B.2486855	Arthrobacter sulfonylureivorans	BACTERIA_V1V2	11	3.64532	0.334761	0.003127	0.036883	12	0.109091	0.436045
147	B.2843215	Miltoncostaea marina	BACTERIA_V1V2	14	3.87176	0.354964	0.004545	0.061169	15	0.153846	0.695388
148	B.37482	Laceyella sacchari	BACTERIA_V1V2	9	3.69639	0.334557	0.002512	0.029514	3	0.083333	0.349141
149	B.2843216	Miltoncostaea oceani	BACTERIA_V1V2	12	3.29173	0.329717	0.003048	0.041553	1	0.121212	0.488119
150	B.2908840	Planococcus sp. 107-1	BACTERIA_V1V2	12	3.58012	0.328134	0.003825	0.034115	1	0.090909	0.415876
151	B.2884264	Nocardioides sp. Kera G14	BACTERIA_V1V2	13	3.7386	0.350866	0.004659	0.053399	11	0.076923	0.612344
152	B.2884263	Aquihabitans sp. Kera 3	BACTERIA_V1V2	10	4.35997	0.334557	0.002599	0.034037	5	0.088889	0.405239
153	B.2908839	Paenibacillus sp. YPD9-1	BACTERIA_V1V2	11	3.60718	0.335172	0.002783	0.038702	6	0.109091	0.45187
154	B.2675378	Erwinia sp. E602	BACTERIA_V1V2	13	4.26691	0.346861	0.004651	0.047381	8	0.115385	0.553772
155	B.2830983	Arthrobacter sp. NtRootA1	BACTERIA_V1V2	14	3.78668	0.352676	0.004821	0.053603	15	0.087912	0.617365
156	B.2712223	Nocardioides anomalus	BACTERIA_V1V2	11	3.40469	0.337654	0.002882	0.038445	7	0.145455	0.457106
157	B.2712222	Nordella sp. HKS 07	BACTERIA_V1V2	15	3.37694	0.350192	0.005407	0.054892	2	0.152381	0.642083
158	B.2962064	Microbacterium sp. M28	BACTERIA_V1V2	13	3.37607	0.339541	0.004513	0.043538	14	0.089744	0.517289
159	B.459472	Planococcus glaciei	BACTERIA_V1V2	8	2.27114	0.304905	0.0009	0.024619	10	0.214286	0.300944
160	B.29405	Microlunatus phosphovorus	BACTERIA_V1V2	13	3.34318	0.338281	0.00498	0.039941	16	0.076923	0.479917
161	B.1827580	Streptomyces nigra	BACTERIA_V1V2	8	3.18848	0.310091	0.001336	0.023675	8	0.142857	0.281713
162	B.29423	Legionella oakridgensis	BACTERIA_V1V2	17	4.51951	0.360818	0.007635	0.066692	11	0.088235	0.76462
163	B.512763	Rufibacter tibetensis	BACTERIA_V1V2	10	2.56247	0.332725	0.002294	0.038403	14	0.155556	0.449548
164	B.777	Coxiella burnetii	BACTERIA_V1V2	15	4.07349	0.348852	0.005087	0.056743	2	0.171429	0.662856
165	B.2528020	Rhodococcus sp. ABRD24	BACTERIA_V1V2	10	3.74196	0.324629	0.002465	0.030203	1	0.088889	0.365129
166	B.3019544	Hyphomicrobium sp. DMF-1	BACTERIA_V1V2	12	2.90376	0.344242	0.003653	0.047156	4	0.090909	0.540925
167	B.2761579	Hymenobacter sp. S2-20-2	BACTERIA_V1V2	16	4.12674	0.361056	0.006477	0.063414	8	0.1	0.724877
168	B.2745197	Adhaeribacter radiodurans	BACTERIA_V1V2	13	3.83995	0.344675	0.004627	0.047285	2	0.102564	0.555379
169	B.29510	Turneriella parva	BACTERIA_V1V2	15	4.4199	0.35775	0.005699	0.060332	12	0.095238	0.694227
170	B.2745198	Metabacillus sp. KUDC1714	BACTERIA_V1V2	14	3.97214	0.341448	0.003642	0.052529	10	0.21978	0.615764
171	B.2728827	Catellatospora sp. IY07-71	BACTERIA_V1V2	12	3.68132	0.341235	0.003655	0.041701	12	0.121212	0.491678
172	B.2593652	Mangrovibacillus cuniculi	BACTERIA_V1V2	12	4.12317	0.337238	0.00369	0.040355	10	0.106061	0.480199
173	B.29539	Thermoleophilum album	BACTERIA_V1V2	9	3.38577	0.3061	0.001881	0.023277	11	0.138889	0.289455
174	B.2986827	Flavobacterium sp. N1994	BACTERIA_V1V2	11	2.60531	0.330314	0.003224	0.035843	17	0.145455	0.430115
175	B.1221500	Fictibacillus phosphorivorans	BACTERIA_V1V2	10	2.66161	0.317654	0.002227	0.027678	10	0.133333	0.339592
176	B.2872154	Nocardioides coralli	BACTERIA_V1V2	13	4.17777	0.343162	0.004597	0.04594	7	0.102564	0.537021
177	B.881	Desulfovibrio vulgaris	BACTERIA_V1V2	11	3.07109	0.33374	0.002791	0.040433	15	0.127273	0.472344
178	B.2601894	Halioglobus maricola	BACTERIA_V1V2	11	3.80788	0.325402	0.002311	0.038288	0	0.181818	0.448986
179	B.959	Bdellovibrio bacteriovorus	BACTERIA_V1V2	12	3.15786	0.339752	0.004247	0.03972	13	0.090909	0.467525
180	B.960	Bacteriovorax stolpii	BACTERIA_V1V2	14	4.05874	0.351768	0.005154	0.052077	10	0.087912	0.603004
181	B.189381	Rossellomorea marisflavi	BACTERIA_V1V2	13	4.11562	0.339963	0.003599	0.049538	2	0.192308	0.577041
182	B.1332188	Candidatus Saccharimonas aalborgensis	BACTERIA_V1V2	10	2.82917	0.321576	0.002257	0.031636	16	0.177778	0.383886
183	B.1979344	Flavobacterium sp. MDT1-60	BACTERIA_V1V2	8	2.51717	0.322524	0.001606	0.027238	5	0.071429	0.324268
184	B.2995170	Luteolibacter sp. SL250	BACTERIA_V1V2	12	3.73442	0.347743	0.003885	0.045472	6	0.090909	0.527542
185	B.717785	Hyphomicrobium sp. MC1	BACTERIA_V1V2	14	3.94336	0.354504	0.004788	0.055548	2	0.076923	0.647324
186	B.985	Cytophaga hutchinsonii	BACTERIA_V1V2	9	3.8849	0.319137	0.001988	0.028939	5	0.027778	0.345592
187	B.995	Solitalea canadensis	BACTERIA_V1V2	12	4.71159	0.335789	0.00297	0.045767	6	0.166667	0.527127
188	B.2937800	Conexibacter sp. S30A1	BACTERIA_V1V2	15	3.09574	0.334557	0.004951	0.049005	11	0.152381	0.589187
189	B.2937801	Conexibacter sp. DBS9H8	BACTERIA_V1V2	8	2.42334	0.306271	0.001405	0.022579	17	0.178571	0.277421
190	B.2782166	Microbacterium sp. A18JL241	BACTERIA_V1V2	15	4.44168	0.347302	0.005485	0.04884	5	0.095238	0.582749
191	B.2675754	Occultella kanbiaonis	BACTERIA_V1V2	12	2.90125	0.334966	0.003393	0.040067	1	0.106061	0.473067
192	B.1295382	Methylogaea oryzae	BACTERIA_V1V2	13	4.60013	0.344893	0.003841	0.047317	1	0.115385	0.548784
193	B.2933797	Blastococcus sp. PRF04-17	BACTERIA_V1V2	13	4.61486	0.347964	0.004298	0.048938	13	0.115385	0.568651
194	B.467976	Iamia majanohamensis	BACTERIA_V1V2	14	3.81187	0.349968	0.00516	0.049593	2	0.098901	0.584842
195	B.160791	Rhizorhabdus wittichii	BACTERIA_V1V2	14	3.48415	0.349968	0.005791	0.050429	10	0.076923	0.590517
196	B.1508404	Jeotgalibacillus malaysiensis	BACTERIA_V1V2	15	3.70015	0.347964	0.005038	0.056768	6	0.152381	0.662567
197	B.37928	Arthrobacter crystallopoietes	BACTERIA_V1V2	11	3.53376	0.334761	0.003378	0.037968	17	0.109091	0.454237
198	B.2995304	Nannocystis sp. fl3	BACTERIA_V1V2	14	3.24409	0.34081	0.00538	0.042438	14	0.120879	0.513648
199	B.2774137	Devosia rhizoryzae	BACTERIA_V1V2	10	3.83422	0.321576	0.002975	0.026077	12	0.111111	0.32585
200	B.2511995	Pseudolysobacter antarcticus	BACTERIA_V1V2	13	3.44001	0.347081	0.003385	0.055951	9	0.153846	0.636021
201	B.2864201	Aureispira sp. EL160426	BACTERIA_V1V2	12	3.78261	0.342732	0.003328	0.045165	2	0.075758	0.518452
202	B.328812	Parabacteroides goldsteinii	BACTERIA_V1V2	13	4.05338	0.350641	0.004311	0.051331	16	0.115385	0.591606
203	B.33899	Streptomyces galilaeus	BACTERIA_V1V2	16	3.31495	0.347743	0.006332	0.05407	17	0.116667	0.639794
204	B.2704465	Rhodocytophaga rosea	BACTERIA_V1V2	16	4.29395	0.354504	0.006265	0.060947	5	0.091667	0.698842
205	B.492670	Bacillus velezensis	BACTERIA_V1V2	14	4.53676	0.353359	0.00497	0.05597	1	0.131868	0.647329
206	B.2704468	Streptacidiphilus sp. P02-A3a	BACTERIA_V1V2	9	3.70065	0.321576	0.002224	0.029015	16	0.194444	0.352541
207	B.861299	Gemmatirosa kalamazoonensis	BACTERIA_V1V2	8	2.42045	0.311149	0.00174	0.023213	11	0.071429	0.285901
208	B.33938	Geobacillus thermocatenulatus	BACTERIA_V1V2	13	3.51909	0.346203	0.004056	0.05035	11	0.102564	0.588114
209	B.283811	Stackebrandtia nassauensis	BACTERIA_V1V2	12	3.80366	0.337863	0.003464	0.042507	2	0.136364	0.495987
210	B.2929796	Lysinibacillus sp. PLM2	BACTERIA_V1V2	13	3.8674	0.345546	0.003447	0.056097	15	0.153846	0.631616
211	B.1582259	Gudongella oleilytica	BACTERIA_V1V2	12	4.04647	0.347522	0.004095	0.043465	5	0.136364	0.512708
212	B.2909339	Dyadobacter chenhuakuii	BACTERIA_V1V2	14	5.71306	0.349968	0.004113	0.056609	4	0.10989	0.639373
213	B.2507935	Cohnella abietis	BACTERIA_V1V2	13	3.51661	0.342303	0.004575	0.042661	11	0.128205	0.507797
214	B.107709	Opitutus terrae	BACTERIA_V1V2	11	3.67568	0.330713	0.002711	0.038959	4	0.090909	0.454656
215	B.332999	Pedobacter suwonensis	BACTERIA_V1V2	17	4.44221	0.363939	0.007362	0.067855	15	0.095588	0.777162
216	B.3003623	Flavobacterium sp. IMCC34518	BACTERIA_V1V2	14	4.04526	0.348408	0.005155	0.051397	10	0.120879	0.599741
217	B.2811111	Natronosporangium hydrolyticum	BACTERIA_V1V2	14	3.75845	0.352222	0.004571	0.055562	7	0.131868	0.636305
218	B.1231	Nitrosospira multiformis	BACTERIA_V1V2	14	4.16325	0.333944	0.004355	0.043517	12	0.142857	0.523821
219	B.152794	Corynebacterium efficiens	BACTERIA_V1V2	9	2.76487	0.323477	0.002637	0.027456	3	0.055556	0.331995
220	B.2233542	Planococcus halotolerans	BACTERIA_V1V2	9	3.05282	0.304735	0.001475	0.021661	12	0.166667	0.276081
221	B.1275	Kocuria rosea	BACTERIA_V1V2	13	3.24708	0.342089	0.004107	0.046493	1	0.102564	0.546402
222	B.1280	Staphylococcus aureus	BACTERIA_V1V2	11	2.63382	0.331314	0.003652	0.034438	1	0.072727	0.415547
223	B.1357074	Pseudomonas sp. LS44	BACTERIA_V1V2	11	2.99261	0.33374	0.002699	0.037501	5	0.090909	0.445149
224	B.1471761	Novibacillus thermophilus	BACTERIA_V1V2	9	3.44913	0.315092	0.001864	0.025833	12	0.166667	0.31532
225	B.255247	Fictibacillus arsenicus	BACTERIA_V1V2	15	3.8677	0.350192	0.00643	0.051797	8	0.07619	0.613234
226	B.42253	Nitrospira moscoviensis	BACTERIA_V1V2	8	2.52424	0.312215	0.001593	0.02394	11	0.107143	0.290798
227	B.279826	Mesobacillus foraminis	BACTERIA_V1V2	13	3.53779	0.341875	0.004287	0.046493	11	0.102564	0.540603
228	B.54571	Streptomyces venezuelae	BACTERIA_V1V2	15	4.06053	0.350866	0.005519	0.057675	0	0.114286	0.67033
229	B.2802971	Luteitalea sp. TBR-22	BACTERIA_V1V2	9	2.9784	0.316918	0.002393	0.023711	16	0.138889	0.296118
230	B.2897181	Flavobacterium channae	BACTERIA_V1V2	12	3.3937	0.331917	0.003966	0.03419	11	0.075758	0.411668
231	B.2303331	Solimonas sp. K1W22B-7	BACTERIA_V1V2	12	3.54838	0.330913	0.00281	0.043335	10	0.136364	0.51032
232	B.1811807	Sulfuriflexus mobilis	BACTERIA_V1V2	13	3.15314	0.347743	0.003877	0.050754	13	0.089744	0.586908
233	B.2303332	Cellvibrio sp. KY-GH-1	BACTERIA_V1V2	11	3.37685	0.326762	0.002619	0.038147	16	0.163636	0.45807
234	B.2016596	Nitrogeniibacter mangrovi	BACTERIA_V1V2	15	4.93922	0.353588	0.005017	0.060769	4	0.133333	0.690256
235	B.66892	Streptomyces gardneri	BACTERIA_V1V2	8	2.49322	0.318208	0.001627	0.028419	9	0.107143	0.328747
236	B.927083	Sandaracinus amylolyticus	BACTERIA_V1V2	11	2.86371	0.32007	0.002401	0.034425	10	0.109091	0.410976
237	B.2917724	Nocardioides sp. TF02-7	BACTERIA_V1V2	12	3.71296	0.335377	0.002976	0.045185	5	0.151515	0.525309
238	B.2917725	Georgenia sp. TF02-10	BACTERIA_V1V2	14	3.86109	0.341875	0.005022	0.047534	6	0.120879	0.566963
239	B.284016	Phenylobacterium zucineum	BACTERIA_V1V2	12	5.7109	0.331917	0.002995	0.043282	15	0.181818	0.507665
240	B.1397	Niallia circulans	BACTERIA_V1V2	12	3.83998	0.331114	0.00332	0.042158	0	0.136364	0.49222
241	B.1399	Cytobacillus firmus	BACTERIA_V1V2	17	3.11549	0.351091	0.006943	0.059013	10	0.110294	0.696781
242	B.13689	Sphingomonas paucimobilis	BACTERIA_V1V2	8	2.78659	0.325983	0.001767	0.0279	1	0.071429	0.328105
243	B.1402	Bacillus licheniformis	BACTERIA_V1V2	15	2.67326	0.346203	0.004865	0.055042	11	0.133333	0.636766
244	B.1404	Priestia megaterium	BACTERIA_V1V2	8	3.4537	0.313467	0.001298	0.026709	10	0.107143	0.31412
245	B.1407	Peribacillus psychrosaccharolyticus	BACTERIA_V1V2	10	3.40691	0.33374	0.002458	0.034793	2	0.111111	0.411451
246	B.1423	Bacillus subtilis	BACTERIA_V1V2	11	3.30934	0.320633	0.002485	0.031796	1	0.090909	0.383015
247	B.2897342	Geomonas sp. RF6	BACTERIA_V1V2	11	3.54224	0.329122	0.00245	0.038424	2	0.181818	0.45345
248	B.1428	Bacillus thuringiensis	BACTERIA_V1V2	13	3.78865	0.345546	0.004527	0.046074	4	0.102564	0.537262
249	B.66969	Legionella waltersii	BACTERIA_V1V2	15	3.44795	0.338281	0.004085	0.052759	0	0.152381	0.625402
250	B.2663857	Nocardioides sp. zg-579	BACTERIA_V1V2	10	3.08348	0.331515	0.003179	0.032543	4	0.088889	0.387839
251	B.2901381	Cytobacillus sp. CY-G	BACTERIA_V1V2	14	3.72214	0.347081	0.004639	0.051447	9	0.10989	0.602088
252	B.1449	Amphibacillus xylanus	BACTERIA_V1V2	10	2.98612	0.328726	0.002437	0.033058	17	0.133333	0.391965
253	B.2508168	Luteimonas sp. YGD11-2	BACTERIA_V1V2	9	2.60294	0.311503	0.002314	0.022708	0	0.111111	0.282686
254	B.357808	Roseiflexus sp. RS-1	BACTERIA_V1V2	13	3.24307	0.334148	0.0039	0.041894	12	0.115385	0.496306
255	B.1464	Paenibacillus larvae	BACTERIA_V1V2	17	3.77644	0.350641	0.005819	0.062437	2	0.139706	0.724354
256	B.386490	Terribacillus goriensis	BACTERIA_V1V2	10	3.32797	0.324629	0.002513	0.031318	0	0.066667	0.37745
257	B.2758037	Chryseobacterium sp. CX-624	BACTERIA_V1V2	9	2.45105	0.314007	0.001815	0.026103	12	0.138889	0.320881
258	B.2319843	Hymenobacter oligotrophus	BACTERIA_V1V2	10	3.0584	0.319137	0.002387	0.027847	17	0.155556	0.346832
259	B.116188	Streptomyces coeruleorubidus	BACTERIA_V1V2	13	3.84914	0.33313	0.004243	0.039757	14	0.076923	0.485302
260	B.1005039	Fimbriimonas ginsengisoli	BACTERIA_V1V2	13	3.94309	0.338072	0.004498	0.041327	11	0.089744	0.495548
261	B.1750527	Roseomonas sp. S08	BACTERIA_V1V2	15	4.69474	0.342732	0.004144	0.054565	12	0.2	0.640199
262	B.83451	Archangium violaceum	BACTERIA_V1V2	11	3.63396	0.34511	0.003457	0.042137	13	0.090909	0.493181
263	B.2881056	Demequina sp. TMPB413	BACTERIA_V1V2	13	3.31606	0.3387	0.004029	0.043245	3	0.102564	0.513937
264	B.2057743	Actinomyces wuliandei	BACTERIA_V1V2	11	4.66097	0.328726	0.002383	0.041914	11	0.2	0.492609
265	B.75293	Streptomyces autolyticus	BACTERIA_V1V2	12	3.91189	0.343593	0.003497	0.047297	0	0.106061	0.543011
266	B.1571	Sporosarcina ureae	BACTERIA_V1V2	13	3.63077	0.325015	0.003251	0.040405	11	0.153846	0.488769
267	B.1584	Lactobacillus delbrueckii	BACTERIA_V1V2	11	3.34852	0.340386	0.003371	0.041488	9	0.072727	0.484993
268	B.2086471	Adhaeribacter swui	BACTERIA_V1V2	12	4.39352	0.347081	0.003763	0.045893	3	0.075758	0.53253
269	B.2705012	Streptacidiphilus sp. PB12-B1b	BACTERIA_V1V2	10	3.2639	0.324052	0.001948	0.033888	10	0.244444	0.404851
270	B.2315862	Paraflavitalea soli	BACTERIA_V1V2	10	3.8587	0.325208	0.002081	0.034745	15	0.133333	0.408844
271	B.1115758	Romboutsia ilealis	BACTERIA_V1V2	10	3.39049	0.325402	0.002572	0.031206	8	0.133333	0.378098
272	B.2963105	Neobacillus sp. Marseille-Q6967	BACTERIA_V1V2	12	3.56182	0.329122	0.002915	0.042457	11	0.136364	0.494518
273	B.2594473	Sphingomonas xanthus	BACTERIA_V1V2	12	2.98219	0.327741	0.003635	0.033409	17	0.121212	0.411653
274	B.419479	Jiangella alkaliphila	BACTERIA_V1V2	16	5.90398	0.356352	0.006546	0.05833	14	0.1	0.681891
275	B.280236	Nocardiopsis gilva	BACTERIA_V1V2	13	4.56187	0.349298	0.003766	0.054293	15	0.115385	0.618954
276	B.2233999	Skermanella pratensis	BACTERIA_V1V2	8	3.07062	0.307822	0.001769	0.018343	0	0.107143	0.235984
277	B.2086577	Lysinibacillus timonensis	BACTERIA_V1V2	13	2.80834	0.33891	0.003251	0.052059	0	0.166667	0.593955
278	B.624315	Phytohabitans suffuscus	BACTERIA_V1V2	15	5.47489	0.336202	0.004095	0.052703	11	0.152381	0.609179
279	B.1744	Propionibacterium freudenreichii	BACTERIA_V1V2	14	3.64687	0.349744	0.00556	0.048094	1	0.054945	0.562746
280	B.67282	Streptomyces calvus	BACTERIA_V1V2	12	3.32061	0.344242	0.003678	0.045998	9	0.166667	0.539449
281	B.2975482	Paenibacillus sp. SS4	BACTERIA_V1V2	16	6.25274	0.355195	0.006285	0.061099	4	0.091667	0.703188
282	B.1193713	Neobacillus mesonae	BACTERIA_V1V2	11	3.04645	0.326178	0.003518	0.030546	3	0.090909	0.372341
283	B.2746060	Legionella sp. PC1000	BACTERIA_V1V2	12	3.21742	0.333944	0.002966	0.046061	1	0.151515	0.527922
284	B.1324796	Lysobacter lycopersici	BACTERIA_V1V2	11	4.22346	0.332119	0.003176	0.037903	12	0.127273	0.447714
285	B.2807512	Humisphaera borealis	BACTERIA_V1V2	12	4.06364	0.340598	0.00343	0.042785	4	0.121212	0.502616
286	B.1789	Mycobacterium xenopi	BACTERIA_V1V2	11	3.63938	0.329717	0.002859	0.03738	1	0.163636	0.443457
287	B.2758442	Actinotalea sp. JY-7876	BACTERIA_V1V2	13	3.69536	0.335995	0.003909	0.046325	12	0.153846	0.549996
288	B.1793	Mycolicibacterium fallax	BACTERIA_V1V2	12	3.65225	0.334352	0.003814	0.041774	11	0.075758	0.497887
289	B.2758440	Changpingibacter yushuensis	BACTERIA_V1V2	10	3.24922	0.326762	0.002809	0.032487	12	0.066667	0.38932
290	B.1797	Mycolicibacterium thermoresistibile	BACTERIA_V1V2	12	4.96207	0.334148	0.003349	0.036077	16	0.090909	0.436203
291	B.1801	Mycolicibacterium diernhoferi	BACTERIA_V1V2	11	3.32998	0.340386	0.00328	0.041417	12	0.127273	0.485915
292	B.2545455	Arachidicoccus sp. B3-10	BACTERIA_V1V2	11	3.83523	0.329518	0.00309	0.034229	5	0.054545	0.408331
293	B.362257	Streptomyces vietnamensis	BACTERIA_V1V2	13	3.61291	0.348186	0.005041	0.045158	6	0.064103	0.529743
294	B.1636152	Planctomyces sp. SH-PL62	BACTERIA_V1V2	13	3.67658	0.342947	0.003394	0.050792	1	0.128205	0.585535
295	B.1824	Nocardia asteroides	BACTERIA_V1V2	14	4.26994	0.344242	0.004079	0.051803	17	0.10989	0.601418
296	B.1828	Rhodococcus fascians	BACTERIA_V1V2	10	3.39782	0.330314	0.002317	0.033539	1	0.133333	0.396631
297	B.1852	Saccharomonospora viridis	BACTERIA_V1V2	13	2.86524	0.339963	0.004161	0.042982	8	0.115385	0.513211
298	B.386874	Sphingomonas sediminicola	BACTERIA_V1V2	10	4.57245	0.327741	0.00239	0.034019	10	0.111111	0.401948
299	B.1861	Geodermatophilus obscurus	BACTERIA_V1V2	13	2.97351	0.33912	0.004219	0.041424	11	0.089744	0.493487
300	B.1866	Actinoplanes missouriensis	BACTERIA_V1V2	10	4.75933	0.325789	0.002481	0.033019	1	0.111111	0.390248
301	B.1867	Actinoplanes teichomyceticus	BACTERIA_V1V2	10	3.57965	0.331515	0.002823	0.032057	3	0.111111	0.378399
302	B.2021234	Ahniella affigens	BACTERIA_V1V2	11	2.95554	0.341022	0.003134	0.043705	3	0.145455	0.503482
303	B.1927	Streptomyces rimosus	BACTERIA_V1V2	13	3.70329	0.341661	0.003612	0.046639	0	0.115385	0.540866
304	B.2742204	Methyloligella sp. GL2	BACTERIA_V1V2	12	3.43086	0.325983	0.002878	0.037648	6	0.136364	0.45422
305	B.575378	Sediminibacterium sp. TEGAF015	BACTERIA_V1V2	12	3.74343	0.332725	0.003687	0.040434	5	0.106061	0.480595
306	B.2070463	Lysinibacillus sp. SGAir0095	BACTERIA_V1V2	12	2.93763	0.330115	0.002826	0.040028	8	0.212121	0.478518
307	B.2819978	Cellulomonas fengjieae	BACTERIA_V1V2	13	2.88752	0.334557	0.003974	0.039246	5	0.102564	0.473574
308	B.2840457	Nocardioides sp. LMS-CY	BACTERIA_V1V2	10	3.29133	0.31895	0.002659	0.025713	12	0.111111	0.322958
309	B.1492898	Flavisolibacter tropicus	BACTERIA_V1V2	13	4.22655	0.349075	0.004349	0.051739	1	0.089744	0.593929
310	B.1993	Actinomadura madurae	BACTERIA_V1V2	12	3.80071	0.335172	0.003936	0.039063	12	0.121212	0.468634
311	B.2713573	Sphingobacterium sp. DR205	BACTERIA_V1V2	11	2.94285	0.338072	0.003801	0.039129	17	0.036364	0.4593
312	B.2762748	Sphingosinithalassobacter sp. CS137	BACTERIA_V1V2	11	3.04927	0.335377	0.002938	0.039646	0	0.163636	0.463262
313	B.587753	Pseudomonas chlororaphis	BACTERIA_V1V2	13	4.2	0.341875	0.004034	0.045474	6	0.115385	0.533584
314	B.661481	Flavisolibacter ginsenosidimutans	BACTERIA_V1V2	11	3.37047	0.335172	0.003112	0.038628	2	0.109091	0.45309
315	B.2021	Thermobifida fusca	BACTERIA_V1V2	11	2.96076	0.326958	0.003276	0.032063	8	0.145455	0.395562
316	B.96232	Legionella lytica	BACTERIA_V1V2	11	2.67278	0.325983	0.002904	0.033029	16	0.145455	0.40151
317	B.563172	Ferruginibacter lapsinanis	BACTERIA_V1V2	13	3.89094	0.34081	0.003846	0.043828	16	0.128205	0.517182
318	B.1402861	Priestia filamentosa	BACTERIA_V1V2	9	2.55118	0.319323	0.002171	0.025964	10	0.138889	0.316663
319	B.2057	Sphaerobacter thermophilus	BACTERIA_V1V2	13	4.60308	0.341235	0.003822	0.04724	9	0.115385	0.54685
320	B.2893884	Flavobacterium sp. F-70	BACTERIA_V1V2	12	4.67019	0.334352	0.003778	0.037483	12	0.090909	0.449772
321	B.2066483	Candidatus Chromulinivorax destructor	BACTERIA_V1V2	9	3.38124	0.33313	0.002485	0.02876	8	0.055556	0.343382
322	B.546874	Microlunatus sagamiharensis	BACTERIA_V1V2	12	4.73453	0.339752	0.003398	0.045719	9	0.106061	0.529268
323	B.546871	Friedmanniella luteola	BACTERIA_V1V2	13	3.90487	0.347302	0.004913	0.048202	4	0.102564	0.561561
324	B.2857064	Pseudemcibacter aquimaris	BACTERIA_V1V2	12	3.36716	0.328529	0.002982	0.036576	8	0.106061	0.440013
325	B.2857059	Mycobacterium sp. SMC-4	BACTERIA_V1V2	13	4.03013	0.341661	0.004412	0.048618	7	0.153846	0.561918
326	B.370764	Microbacterium pygmaeum	BACTERIA_V1V2	11	3.6594	0.335172	0.002991	0.040863	17	0.109091	0.476401
327	B.673862	Candidatus Babela massiliensis	BACTERIA_V1V2	9	2.91577	0.332725	0.002136	0.033043	9	0.083333	0.389899
328	B.370777	Arenimonas daejeonensis	BACTERIA_V1V2	10	3.77426	0.335583	0.003289	0.035246	10	0.066667	0.419621
329	B.202862	Streptomyces drozdowiczii	BACTERIA_V1V2	9	2.72246	0.332928	0.002554	0.030649	8	0.055556	0.364755
330	B.321662	Pseudomonas moraviensis	BACTERIA_V1V2	12	4.10974	0.339752	0.004094	0.038972	2	0.090909	0.468301
331	B.1841249	Streptomyces sp. RTd22	BACTERIA_V1V2	10	2.87353	0.308865	0.002158	0.023342	0	0.088889	0.298706
332	B.2795690	Kaistia sp. 32K	BACTERIA_V1V2	12	3.28741	0.325208	0.003019	0.036455	11	0.166667	0.436941
333	B.211114	Allokutzneria albata	BACTERIA_V1V2	14	4.21515	0.350866	0.004933	0.054556	16	0.120879	0.636009
334	B.2676868	Phnomibacter ginsenosidimutans	BACTERIA_V1V2	11	3.1774	0.331917	0.002608	0.039933	0	0.145455	0.46918
335	B.219314	Aeromicrobium marinum	BACTERIA_V1V2	11	3.09638	0.329717	0.00373	0.031806	0	0.054545	0.392191
336	B.2803858	Nocardioides sp. zg-536	BACTERIA_V1V2	11	4.58915	0.328134	0.002938	0.034904	14	0.145455	0.41941
337	B.2562284	Pseudolabrys sp. FHR47	BACTERIA_V1V2	12	2.88281	0.341875	0.00379	0.04433	17	0.106061	0.522865
338	B.2488560	Pigmentiphaga sp. H8	BACTERIA_V1V2	12	4.03011	0.344242	0.003416	0.045413	2	0.121212	0.528463
339	B.104663	Chitinophaga filiformis	BACTERIA_V1V2	11	3.71026	0.333333	0.003166	0.035217	5	0.072727	0.418111
340	B.1620215	Sulfuricaulis limicola	BACTERIA_V1V2	10	3.22442	0.334966	0.002673	0.037206	1	0.111111	0.43259
341	B.1849581	Dyella caseinilytica	BACTERIA_V1V2	15	3.34495	0.349968	0.006587	0.050372	2	0.066667	0.596842
342	B.1296669	Aquabacterium olei	BACTERIA_V1V2	10	3.36361	0.333944	0.002326	0.041095	4	0.133333	0.465482
343	B.674079	Marisediminicola antarctica	BACTERIA_V1V2	17	4.925	0.365642	0.007589	0.068061	2	0.080882	0.77974
344	B.2763008	Nocardioides sp. zg-1228	BACTERIA_V1V2	14	4.53739	0.352676	0.004886	0.057046	3	0.120879	0.653535
345	B.2350	Haliscomenobacter hydrossis	BACTERIA_V1V2	8	2.24457	0.307476	0.00157	0.021328	5	0.142857	0.264987
346	B.2603292	Salinibacterium sp. dk2585	BACTERIA_V1V2	12	3.41735	0.336823	0.00307	0.044961	1	0.181818	0.51911
347	B.2775403	Rhizobium sp. TH2	BACTERIA_V1V2	12	3.11628	0.331114	0.003244	0.038349	15	0.106061	0.462005
348	B.2582905	Nocardioides sp. S-1144	BACTERIA_V1V2	9	3.58534	0.316918	0.00173	0.027966	17	0.194444	0.340903
349	B.502115	Methanolobus chelungpuianus	BACTERIA_V1V2	12	3.81741	0.338281	0.00336	0.044436	3	0.151515	0.52005
350	B.547188	Phycisphaera mikurensis	BACTERIA_V1V2	12	4.04636	0.337238	0.003475	0.037716	8	0.166667	0.4548
351	B.1612173	Niveispirillum cyanobacteriorum	BACTERIA_V1V2	10	2.52298	0.322714	0.002072	0.033633	15	0.155556	0.397879
352	B.715179	Paenibacillus sp. sptzw28	BACTERIA_V1V2	14	4.02813	0.350416	0.004659	0.052397	2	0.120879	0.608905
353	B.117157	Actinopolymorpha singaporensis	BACTERIA_V1V2	13	2.6421	0.33374	0.004475	0.040907	17	0.064103	0.496137
354	B.1288636	Ornithinimicrobium flavum	BACTERIA_V1V2	12	3.65613	0.335377	0.003496	0.042224	17	0.181818	0.501652
355	B.477641	Modestobacter marinus	BACTERIA_V1V2	13	4.34809	0.347743	0.004499	0.050988	9	0.102564	0.57882
356	B.2759167	Brachybacterium sp. Z12	BACTERIA_V1V2	12	4.32006	0.326958	0.003484	0.034173	16	0.136364	0.417331
357	B.2976241	Tahibacter sp. W38	BACTERIA_V1V2	10	4.47582	0.312393	0.001961	0.028261	10	0.111111	0.3438
358	B.1325564	Nitrospira japonica	BACTERIA_V1V2	15	3.2719	0.350641	0.006792	0.047805	8	0.07619	0.570377
359	B.1124835	Chryseobacterium carnipullorum	BACTERIA_V1V2	9	2.9997	0.335995	0.00234	0.032559	15	0.055556	0.382357
360	B.2996782	Corallococcus sp. NCRR	BACTERIA_V1V2	15	3.82547	0.349968	0.00613	0.054199	17	0.085714	0.628311
361	B.3009077	Aeromicrobium sp. HA	BACTERIA_V1V2	9	2.89001	0.311149	0.002163	0.023665	16	0.083333	0.29683
362	B.281120	Candidatus Amoebophilus asiaticus	BACTERIA_V1V2	11	3.00671	0.342089	0.002988	0.045031	3	0.127273	0.517701
363	B.1882682	Microvirga ossetica	BACTERIA_V1V2	10	2.94008	0.317838	0.002536	0.02741	16	0.155556	0.341975
364	B.2734618	Microbacterium sp. NIBRBAC000506063	BACTERIA_V1V2	14	3.43711	0.340386	0.004189	0.048972	13	0.153846	0.576442
365	B.1497681	Listeria newyorkensis	BACTERIA_V1V2	13	3.57365	0.330913	0.003669	0.041951	11	0.115385	0.500963
366	B.1473112	Paenibacillus guangzhouensis	BACTERIA_V1V2	12	3.81881	0.346422	0.004096	0.045798	3	0.090909	0.531062
367	B.2951806	Lentzea sp. HUAS12	BACTERIA_V1V2	10	2.45957	0.319883	0.002151	0.031394	13	0.133333	0.37864
368	B.1882749	Opitutus sp. GAS368	BACTERIA_V1V2	11	3.25486	0.334557	0.00366	0.034653	10	0.090909	0.413196
369	B.2067065	Aquella oligotrophica	BACTERIA_V1V2	17	5.46244	0.365642	0.007566	0.070566	4	0.095588	0.801455
370	B.453230	Desulfarculus baarsii	BACTERIA_V1V2	14	4.05404	0.333333	0.005317	0.03983	11	0.10989	0.491321
371	B.2304600	Breoghania sp. L-A4	BACTERIA_V1V2	13	4.5452	0.341235	0.004842	0.039996	5	0.064103	0.479066
372	B.1936029	Mycobacterium sp. MS1601	BACTERIA_V1V2	12	3.83304	0.33933	0.003077	0.044777	16	0.136364	0.522023
373	B.2865833	Pseudonocardia sp. DSM 110487	BACTERIA_V1V2	11	3.35829	0.33912	0.004026	0.035026	2	0.072727	0.417618
374	B.658062	Candidatus Koribacter versatilis	BACTERIA_V1V2	10	4.21042	0.331515	0.002617	0.033446	17	0.088889	0.401002
375	B.2931390	Nocardioides sp. W7	BACTERIA_V1V2	12	3.80188	0.333333	0.002568	0.046126	7	0.19697	0.532075
376	B.1235591	Pseudorhodoplanes sinuspersici	BACTERIA_V1V2	12	3.10468	0.329717	0.00376	0.034565	5	0.106061	0.419508
377	B.2599600	Nitratireductor sp. SY7	BACTERIA_V1V2	12	3.87128	0.345984	0.003529	0.045163	7	0.090909	0.523682
378	B.2718	Cardiobacterium hominis	BACTERIA_V1V2	10	3.03769	0.323286	0.002449	0.031303	8	0.177778	0.37776
379	B.1727164	Pedobacter sp. PACM 27299	BACTERIA_V1V2	11	2.65193	0.327153	0.003289	0.032145	12	0.127273	0.394102
380	B.879274	Shinella sp. HZN7	BACTERIA_V1V2	12	3.57529	0.328726	0.003858	0.033674	11	0.106061	0.40979
381	B.2202249	Streptosporangium sp. 'caverna'	BACTERIA_V1V2	10	2.37472	0.321387	0.002574	0.029508	17	0.111111	0.362962
382	B.2509455	Agromyces protaetiae	BACTERIA_V1V2	11	2.91752	0.336823	0.003447	0.036454	16	0.054545	0.436086
383	B.1768108	Deinococcus actinosclerus	BACTERIA_V1V2	13	3.39561	0.347302	0.004179	0.050723	9	0.128205	0.58949
384	B.2812560	Conexibacter sp. SYSU D00693	BACTERIA_V1V2	11	3.64304	0.334352	0.00291	0.042926	0	0.145455	0.498018
385	B.256701	Glutamicibacter arilaitensis	BACTERIA_V1V2	11	3.099	0.327153	0.002113	0.040865	1	0.254545	0.475194
386	B.412384	Priestia aryabhattai	BACTERIA_V1V2	14	4.7732	0.34511	0.004625	0.051283	10	0.131868	0.602265
387	B.2931399	Pseudarthrobacter sp. SSS035	BACTERIA_V1V2	15	3.49486	0.35775	0.005811	0.062872	2	0.095238	0.714774
388	B.2665156	Candidatus Mycosynbacter amalyticus	BACTERIA_V1V2	10	2.90944	0.325595	0.002224	0.033154	10	0.066667	0.390123
389	B.1653480	Alloactinosynnema sp. L-07	BACTERIA_V1V2	16	4.58543	0.355426	0.00628	0.059525	13	0.116667	0.694897
390	B.2849501	Nocardioides panacis	BACTERIA_V1V2	12	3.16705	0.341661	0.003419	0.043928	15	0.121212	0.511471
391	B.1653478	Rhodococcus sp. PBTS 1	BACTERIA_V1V2	15	3.50258	0.350641	0.005931	0.050474	8	0.085714	0.599928
392	B.133924	Leisingera methylohalidivorans	BACTERIA_V1V2	15	3.74944	0.349075	0.005498	0.055578	14	0.085714	0.647429
393	B.1817405	Abyssicoccus albus	BACTERIA_V1V2	11	4.05597	0.322714	0.00238	0.036916	11	0.181818	0.438852
394	B.3025666	Mucilaginibacter sp. KACC 22063	BACTERIA_V1V2	14	3.71728	0.345765	0.005312	0.047649	10	0.087912	0.56279
395	B.2571030	Pontibacter sp. SGAir0037	BACTERIA_V1V2	16	4.47964	0.352676	0.007858	0.052241	14	0.091667	0.621812
396	B.1882918	Pajaroellobacter abortibovis	BACTERIA_V1V2	14	3.84452	0.351542	0.004539	0.053598	15	0.131868	0.618208
397	B.465721	Steroidobacter denitrificans	BACTERIA_V1V2	12	4.14155	0.332321	0.003914	0.03643	10	0.090909	0.434424
398	B.2898796	Nocardioides sp. cx-173	BACTERIA_V1V2	17	4.95531	0.365397	0.006724	0.071642	10	0.110294	0.817429
399	B.2730847	Flavobacterium sp. M31R6	BACTERIA_V1V2	9	3.94988	0.323477	0.00156	0.03436	4	0.138889	0.393001
400	B.2583377	Saccharibacillus brassicae	BACTERIA_V1V2	8	3.15209	0.307303	0.001263	0.021577	6	0.178571	0.264801
401	B.1071983	Legionella cardiaca	BACTERIA_V1V2	11	3.18955	0.331515	0.002844	0.039001	16	0.163636	0.459535
402	B.129921	Amycolatopsis keratiniphila	BACTERIA_V1V2	11	3.38614	0.333944	0.003736	0.034441	2	0.054545	0.414451
403	B.674703	Rhodoplanes sp. Z2-YC6860	BACTERIA_V1V2	11	4.28229	0.332725	0.002825	0.039179	5	0.145455	0.453899
404	B.2976680	Devosia sp. FJ2-5-3	BACTERIA_V1V2	14	4.28949	0.34081	0.004561	0.046086	5	0.120879	0.541813
405	B.2681766	Maribellus comscasis	BACTERIA_V1V2	13	4.31306	0.33891	0.004322	0.047131	10	0.128205	0.555253
406	B.1784713	Flavobacterium arcticum	BACTERIA_V1V2	11	3.09742	0.33703	0.002722	0.042188	7	0.145455	0.487625
407	B.113562	Actinoplanes derwentensis	BACTERIA_V1V2	13	3.56039	0.345984	0.003589	0.049458	3	0.128205	0.568894
408	B.564137	Roseicitreum antarcticum	BACTERIA_V1V2	13	4.01291	0.329916	0.00351	0.039363	17	0.179487	0.47794
409	B.2984843	Methylobacterium sp. FF17	BACTERIA_V1V2	14	3.88232	0.340174	0.004372	0.051438	0	0.175824	0.607953
410	B.2747268	Dyadobacter sandarakinus	BACTERIA_V1V2	9	2.94539	0.324437	0.002447	0.026752	14	0.083333	0.328759
411	B.80816	Haliangium ochraceum	BACTERIA_V1V2	12	4.61378	0.331314	0.00328	0.040858	9	0.136364	0.487283
412	B.1444770	Xylella taiwanensis	BACTERIA_V1V2	11	3.8336	0.322714	0.002772	0.033206	8	0.145455	0.402271
413	B.2755562	Legionella sp. PC997	BACTERIA_V1V2	13	3.27852	0.347302	0.005238	0.042842	13	0.089744	0.511422
414	B.2067415	Altererythrobacter sp. TH136	BACTERIA_V1V2	12	3.59976	0.336615	0.003827	0.040831	17	0.106061	0.48596
415	B.322509	Dietzia kunjamensis	BACTERIA_V1V2	13	3.82092	0.3387	0.004051	0.044664	12	0.115385	0.526326
416	B.2812896	Leptolyngbya sp. 7M	BACTERIA_V1V2	14	3.64816	0.340598	0.005596	0.042658	11	0.076923	0.520891
417	B.1579979	Wenzhouxiangella marina	BACTERIA_V1V2	17	4.37266	0.362973	0.008223	0.064833	17	0.102941	0.755506
418	B.1379270	Gemmatimonas phototrophica	BACTERIA_V1V2	13	3.79017	0.343809	0.004394	0.045386	12	0.064103	0.530036
419	B.3030011	Paracoccus sp. S3-43	BACTERIA_V1V2	13	4.47886	0.340174	0.004425	0.044508	4	0.128205	0.52346
420	B.2321403	Chryseolinea soli	BACTERIA_V1V2	9	3.8081	0.321765	0.001926	0.029406	17	0.194444	0.355914
421	B.2849779	Aquihabitans sp. G128	BACTERIA_V1V2	11	2.71134	0.326178	0.003421	0.031993	11	0.109091	0.397141
422	B.2911172	Solitalea lacus	BACTERIA_V1V2	15	4.06978	0.360818	0.005516	0.066052	15	0.095238	0.745346
423	B.2722752	Iamia sp. SCSIO 61187	BACTERIA_V1V2	14	3.99824	0.337654	0.005483	0.040106	14	0.10989	0.4903
424	B.44010	Mycobacterium conspicuum	BACTERIA_V1V2	12	3.13921	0.335172	0.00353	0.036926	17	0.090909	0.449528
425	B.486398	Bacillus sp. S3	BACTERIA_V1V2	16	4.12359	0.345765	0.006095	0.056224	10	0.116667	0.656258
426	B.191495	Conexibacter woesei	BACTERIA_V1V2	10	3.35037	0.322904	0.002854	0.029491	0	0.133333	0.366286
427	B.2419774	Protaetiibacter intestinalis	BACTERIA_V1V2	17	3.97076	0.354045	0.007507	0.063261	10	0.088235	0.736469
428	B.1473598	Paludibaculum fermentans	BACTERIA_V1V2	12	3.994	0.342089	0.003	0.046766	11	0.121212	0.539893
429	B.1391653	Vulgatibacter incomptus	BACTERIA_V1V2	14	3.24483	0.335172	0.00471	0.043254	0	0.087912	0.517312
430	B.1391654	Labilithrix luteola	BACTERIA_V1V2	12	4.05055	0.334966	0.003211	0.042155	17	0.121212	0.49826
431	B.248903	Paenibacillus xylanilyticus	BACTERIA_V1V2	13	3.3672	0.351091	0.003567	0.05237	15	0.179487	0.601093
432	B.1903704	Tumebacillus avium	BACTERIA_V1V2	11	3.50765	0.330314	0.003416	0.034305	14	0.145455	0.421179
433	B.191579	Fluviicola taffensis	BACTERIA_V1V2	11	3.18209	0.325983	0.002584	0.034293	16	0.181818	0.41988
434	B.138336	Blastococcus saxobsidens	BACTERIA_V1V2	10	3.0204	0.321009	0.002731	0.028723	14	0.066667	0.352307
435	B.1141883	Massilia putida	BACTERIA_V1V2	8	3.58617	0.310972	0.001281	0.026774	6	0.178571	0.311661
436	B.2575440	Nocardioides jishulii	BACTERIA_V1V2	12	3.02054	0.33891	0.004106	0.037551	12	0.106061	0.456931
437	B.2997333	Baekduia sp. 0141_2	BACTERIA_V1V2	12	4.66586	0.330314	0.003169	0.035733	16	0.136364	0.429794
438	B.1526927	Planococcus sp. PAMC 21323	BACTERIA_V1V2	10	4.67941	0.327545	0.002783	0.029656	12	0.111111	0.360909
439	B.2686094	Terricaulis silvestris	BACTERIA_V1V2	10	4.35564	0.327938	0.002264	0.034985	17	0.111111	0.408754
440	B.2710756	Streptomyces bathyalis	BACTERIA_V1V2	12	4.31419	0.338281	0.003253	0.044979	12	0.181818	0.528651
441	B.1432792	Methylocaldum marinum	BACTERIA_V1V2	12	3.44189	0.33703	0.003522	0.039898	2	0.075758	0.468139
442	B.2710758	Phototrophicus methaneseepsis	BACTERIA_V1V2	11	3.0059	0.332321	0.002635	0.040488	13	0.127273	0.472882
443	B.1838286	Lacunisphaera limnophila	BACTERIA_V1V2	12	3.65876	0.342303	0.004161	0.04112	16	0.090909	0.485644
444	B.1608957	Euzebya pacifica	BACTERIA_V1V2	12	4.82519	0.337238	0.002788	0.046198	7	0.151515	0.528467
445	B.466153	Singulisphaera acidiphila	BACTERIA_V1V2	13	3.6522	0.343809	0.004017	0.04713	12	0.128205	0.545919
446	B.2698458	Nibribacter ruber	BACTERIA_V1V2	9	2.78341	0.318023	0.001513	0.030818	1	0.222222	0.366061
447	B.2219224	Nonomuraea phyllanthi	BACTERIA_V1V2	14	4.74848	0.344675	0.004496	0.049921	0	0.142857	0.581314
448	B.748811	Sulfuritalea hydrogenivorans	BACTERIA_V1V2	11	3.46483	0.337238	0.003665	0.03657	9	0.090909	0.436879
449	B.388357	Kocuria turfanensis	BACTERIA_V1V2	11	3.62575	0.32386	0.002209	0.034963	2	0.163636	0.417489
450	B.556288	Brachybacterium saurashtrense	BACTERIA_V1V2	13	3.69694	0.331114	0.004142	0.041682	10	0.128205	0.497405
451	B.2768162	Roseomonas haemaphysalidis	BACTERIA_V1V2	12	4.33548	0.333537	0.003879	0.039223	10	0.121212	0.46983
452	B.1883414	Pistricoccus aurantiacus	BACTERIA_V1V2	16	5.17049	0.352222	0.005955	0.061209	16	0.108333	0.702412
453	B.273678	Microbacterium hydrocarbonoxydans	BACTERIA_V1V2	20	4.3574	0.366131	0.00899	0.080563	9	0.136842	0.92649
454	B.2768161	Roseomonas marmotae	BACTERIA_V1V2	14	4.30717	0.353588	0.003976	0.06092	7	0.142857	0.692393
455	B.2714939	Nocardioides sp. HDW12B	BACTERIA_V1V2	10	2.46746	0.31895	0.002371	0.029849	11	0.177778	0.363444
456	B.2714938	Nocardioides piscis	BACTERIA_V1V2	10	2.8469	0.320445	0.002638	0.030044	16	0.111111	0.358461
457	B.2714941	Phycicoccus sp. HDW14	BACTERIA_V1V2	11	2.76286	0.331515	0.00258	0.038341	5	0.127273	0.453673
458	B.2592049	Pontibacter sp. XAAS-72	BACTERIA_V1V2	14	4.58332	0.346203	0.005436	0.047906	1	0.076923	0.563851
459	B.93466	Fervidobacterium pennivorans	BACTERIA_V1V2	13	4.17147	0.346641	0.004824	0.045634	15	0.064103	0.530152
460	B.1891644	Epidermidibacterium keratini	BACTERIA_V1V2	10	4.43185	0.326762	0.002604	0.033798	11	0.088889	0.396097
461	B.2583823	Salidesulfovibrio onnuriiensis	BACTERIA_V1V2	11	4.46748	0.334148	0.002759	0.039211	5	0.127273	0.459459
462	B.2759943	Protaetiibacter sp. SSC-01	BACTERIA_V1V2	10	3.11191	0.334352	0.002127	0.038949	2	0.155556	0.446797
463	B.2981137	Chitiniphilus sp. CD1	BACTERIA_V1V2	9	3.85047	0.315092	0.001878	0.02678	5	0.138889	0.325697
464	B.2518370	Nocardioides euryhalodurans	BACTERIA_V1V2	12	3.32942	0.323669	0.003199	0.033022	5	0.166667	0.410784
465	B.2518371	Nocardioides seonyuensis	BACTERIA_V1V2	11	3.69573	0.333333	0.002894	0.039706	11	0.109091	0.469405
466	B.363852	Pedobacter ginsengisoli	BACTERIA_V1V2	13	3.55439	0.331515	0.00332	0.044406	11	0.141026	0.515423
467	B.2039166	Chryseobacterium sp. 6424	BACTERIA_V1V2	12	3.49371	0.328134	0.003421	0.034558	12	0.136364	0.426363
468	B.1842539	Bosea sp. RAC05	BACTERIA_V1V2	13	3.73701	0.332119	0.003834	0.040183	12	0.153846	0.487407
469	B.28047	Mycolicibacterium confluentis	BACTERIA_V1V2	8	2.40387	0.305075	0.001577	0.019538	11	0.071429	0.249821
470	B.2813371	Terrisporobacter hibernicus	BACTERIA_V1V2	10	3.17671	0.321765	0.002965	0.030407	6	0.133333	0.368158
471	B.392593	Inhella inkyongensis	BACTERIA_V1V2	12	4.75731	0.347081	0.003456	0.050226	15	0.045455	0.568954
472	B.2895286	Pedobacter mucosus	BACTERIA_V1V2	11	3.74347	0.335789	0.003286	0.035131	0	0.072727	0.420022
473	B.28068	Rubrivivax gelatinosus	BACTERIA_V1V2	10	3.61033	0.327349	0.0026	0.030656	16	0.133333	0.370216
474	B.2211211	Paraburkholderia dokdonella	BACTERIA_V1V2	8	3.9286	0.313108	0.001558	0.025153	17	0.178571	0.306431
475	B.28077	Nitrospirillum amazonense	BACTERIA_V1V2	12	3.21649	0.340174	0.004328	0.037783	16	0.060606	0.455166
476	B.146923	Streptomyces parvulus	BACTERIA_V1V2	12	3.03525	0.329518	0.002635	0.040904	4	0.151515	0.479201
477	B.2743772	Effusibacillus dendaii	BACTERIA_V1V2	13	3.47785	0.325983	0.003217	0.04208	2	0.179487	0.503552
478	B.60920	Sanguibacter keddieii	BACTERIA_V1V2	12	3.80876	0.347302	0.003751	0.043217	14	0.121212	0.506026
479	B.433659	Nocardioides mesophilus	BACTERIA_V1V2	13	3.25398	0.331314	0.004267	0.041984	16	0.128205	0.499675
480	B.2985506	Homoserinibacter sp. YIM 151385	BACTERIA_V1V2	14	4.77609	0.351542	0.005063	0.052581	4	0.054945	0.605223
481	B.1805827	Rhodococcus sp. MTM3W5.2	BACTERIA_V1V2	14	3.8877	0.347743	0.005455	0.049341	6	0.098901	0.584972
482	B.708113	Terrihabitans soli	BACTERIA_V1V2	14	3.47909	0.343162	0.004102	0.054894	15	0.153846	0.631069
483	B.228899	Peribacillus asahii	BACTERIA_V1V2	11	2.62084	0.325402	0.003185	0.02987	12	0.127273	0.371073
484	B.44577	Nitrosomonas ureae	BACTERIA_V1V2	14	3.74141	0.333537	0.004735	0.042082	10	0.098901	0.511689
485	B.118323	Oscillatoria acuminata	BACTERIA_V1V2	11	4.04402	0.328726	0.002701	0.034657	5	0.127273	0.411023
486	B.1936990	Nitrospira sp. KM1	BACTERIA_V1V2	12	3.89496	0.33933	0.003653	0.041892	2	0.121212	0.497762
487	B.659012	Agromyces soli	BACTERIA_V1V2	10	2.93546	0.321198	0.002104	0.031731	10	0.088889	0.379264
488	B.589382	Agromyces flavus	BACTERIA_V1V2	10	2.98319	0.319883	0.002061	0.032093	5	0.133333	0.385463
489	B.1379909	Rufibacter sp. DG15C	BACTERIA_V1V2	10	3.15765	0.325983	0.001976	0.036471	3	0.177778	0.426543
490	B.417367	Paenisporosarcina antarctica	BACTERIA_V1V2	11	4.41125	0.33912	0.00315	0.036541	13	0.109091	0.434627
491	B.1379910	Rufibacter radiotolerans	BACTERIA_V1V2	14	4.07913	0.336202	0.004531	0.047675	11	0.10989	0.558551
492	B.2760307	Paracoccus sp. MC1862	BACTERIA_V1V2	11	3.3893	0.323669	0.002561	0.033584	16	0.181818	0.41211
493	B.298596	Sporosarcina ureilytica	BACTERIA_V1V2	11	3.68157	0.341235	0.003846	0.039295	7	0.072727	0.458025
494	B.2203204	Streptomyces sp. WAC 01438	BACTERIA_V1V2	16	3.83479	0.360343	0.005631	0.071151	4	0.1	0.801444
495	B.1736306	Aeromicrobium sp. Leaf245	BACTERIA_V1V2	10	3.33237	0.324244	0.002354	0.033305	17	0.177778	0.394192
496	B.2592334	Nocardioides sp. JQ2195	BACTERIA_V1V2	10	2.59378	0.325208	0.002563	0.031593	16	0.111111	0.381704
497	B.704125	Clostridium gelidum	BACTERIA_V1V2	10	3.63396	0.324052	0.002406	0.033933	6	0.088889	0.395608
498	B.2711215	Sphingosinithalassobacter tenebrarum	BACTERIA_V1V2	14	5.00087	0.347302	0.004231	0.054982	12	0.131868	0.635139
499	B.2813578	Pyxidicoccus sp. SCPEA002	BACTERIA_V1V2	12	3.01317	0.332928	0.003607	0.042218	11	0.136364	0.499434
500	B.2838157	Flavihumibacter fluminis (ex Park et al. 2022)	BACTERIA_V1V2	13	3.4769	0.335995	0.004305	0.042058	13	0.115385	0.502046
501	B.2838156	Flavihumibacter rivuli	BACTERIA_V1V2	11	2.95379	0.3387	0.003358	0.040007	9	0.090909	0.464287
502	B.376490	Paradesulfovibrio bizertensis	BACTERIA_V1V2	12	3.57443	0.332725	0.003022	0.040525	5	0.181818	0.478967
503	B.257708	Roseomonas gilardii	BACTERIA_V1V2	12	3.18946	0.334557	0.003639	0.035756	3	0.121212	0.427481
504	B.2653851	Rubrobacter tropicus	BACTERIA_V1V2	9	2.69269	0.317285	0.001402	0.031937	6	0.166667	0.368782
505	B.945844	Massilia oculi	BACTERIA_V1V2	11	2.74548	0.324822	0.002261	0.037921	11	0.218182	0.441427
506	B.2010829	Aerosticca soli	BACTERIA_V1V2	12	3.55376	0.338072	0.004168	0.039862	5	0.075758	0.477153
507	B.2989816	Flavobacterium sp. MFBS3-15	BACTERIA_V1V2	11	4.18515	0.335377	0.003412	0.035002	16	0.109091	0.421407
508	B.642780	Marmoricola scoriae	BACTERIA_V1V2	15	3.83061	0.350192	0.004612	0.056336	12	0.142857	0.653791
509	B.2547394	Flavobacterium nackdongense	BACTERIA_V1V2	12	3.63783	0.341235	0.00348	0.043958	0	0.090909	0.511767
510	B.1933044	Edaphobacter flagellatus	BACTERIA_V1V2	11	2.99405	0.327741	0.002368	0.035192	1	0.145455	0.417259
511	B.110319	Nocardioides sp. CF8	BACTERIA_V1V2	10	2.757	0.323669	0.002157	0.032323	13	0.2	0.385616
512	B.2567881	Citricoccus sp. SGAir0253	BACTERIA_V1V2	9	2.54171	0.313108	0.001946	0.026401	16	0.222222	0.326467
513	B.1789672	Skermanella mucosa	BACTERIA_V1V2	12	3.89399	0.341235	0.003067	0.045955	13	0.151515	0.5305
514	B.2567896	Polyangium aurulentum	BACTERIA_V1V2	11	2.49784	0.320821	0.002959	0.031599	5	0.163636	0.393006
515	B.1851148	Limihaloglobus sulfuriphilus	BACTERIA_V1V2	13	3.27329	0.335172	0.003514	0.047976	11	0.179487	0.557262
516	B.241425	Crinalium epipsammum	BACTERIA_V1V2	10	3.00112	0.328726	0.002929	0.031177	8	0.022222	0.370567
517	B.1707785	Massilia sp. WG5	BACTERIA_V1V2	9	2.90791	0.325402	0.001978	0.03232	15	0.111111	0.380068
518	B.2867005	Mycobacterium sp. IDR2000157661	BACTERIA_V1V2	10	2.63898	0.321765	0.002368	0.031214	8	0.133333	0.372922
519	B.2567941	Metabacillus sediminilitoris	BACTERIA_V1V2	10	2.85628	0.33891	0.00254	0.03975	10	0.133333	0.458825
520	B.1302308	Rhodococcus sp. P1Y	BACTERIA_V1V2	15	4.46619	0.358453	0.005668	0.060442	13	0.095238	0.699331
521	B.2694929	Pontibacter russatus	BACTERIA_V1V2	12	2.83926	0.331114	0.002823	0.041463	17	0.19697	0.493824
522	B.450367	Peribacillus frigoritolerans	BACTERIA_V1V2	11	3.25224	0.331917	0.003151	0.03725	10	0.145455	0.443346
523	B.2694930	Pontibacter pudoricolor	BACTERIA_V1V2	17	4.13238	0.360343	0.007401	0.063551	6	0.102941	0.737021
524	B.2494234	Sutterella megalosphaeroides	BACTERIA_V1V2	8	2.58295	0.310795	0.001259	0.026254	11	0.142857	0.313093
525	B.2862869	Horticoccus luteus	BACTERIA_V1V2	13	4.11565	0.349968	0.003432	0.057352	6	0.192308	0.647054
526	B.2809707	Salinimicrobium sp. HN-2-9-2	BACTERIA_V1V2	11	3.87397	0.340174	0.003129	0.039443	4	0.145455	0.461701
527	B.692036	Tuwongella immobilis	BACTERIA_V1V2	11	3.57649	0.323477	0.002613	0.03755	14	0.163636	0.446075
528	B.323415	Dokdonella koreensis	BACTERIA_V1V2	15	4.1603	0.339541	0.00501	0.049826	14	0.12381	0.593586
529	B.388950	Pontibacter akesuensis	BACTERIA_V1V2	13	3.6189	0.355195	0.0044	0.055	1	0.102564	0.63507
530	B.118613	Pseudomonas sp. B10	BACTERIA_V1V2	12	2.77056	0.327741	0.003029	0.037661	0	0.136364	0.456854
531	B.1249101	Mycolicibacterium celeriflavum	BACTERIA_V1V2	14	3.81347	0.333944	0.004466	0.04378	14	0.175824	0.531045
532	B.2051957	Rubrobacter indicoceani	BACTERIA_V1V2	13	3.81807	0.342089	0.003537	0.051474	15	0.128205	0.590899
533	B.2903901	Phenylobacterium sp. LH3H17	BACTERIA_V1V2	13	3.72724	0.347964	0.005434	0.047232	16	0.076923	0.555778
534	B.2842453	Amycolatopsis aidingensis	BACTERIA_V1V2	13	3.37046	0.331917	0.004046	0.038066	16	0.153846	0.466776
535	B.2494374	Tabrizicola piscis	BACTERIA_V1V2	15	4.07294	0.351768	0.005877	0.052928	1	0.133333	0.622291
536	B.2920382	Chitinophaga sp. R8	BACTERIA_V1V2	14	4.51436	0.336202	0.004214	0.047677	16	0.153846	0.564005
537	B.2682810	Iocasia fonsfrigidae	BACTERIA_V1V2	14	4.44771	0.340598	0.004009	0.048382	2	0.120879	0.571336
538	B.2592654	Protaetiibacter larvae	BACTERIA_V1V2	10	3.79766	0.332928	0.002202	0.038219	6	0.155556	0.445591
539	B.200618	Nocardioides aromaticivorans	BACTERIA_V1V2	10	4.18578	0.328134	0.002396	0.03642	9	0.177778	0.422154
540	B.2903960	Sphingomonas sp. S2-65	BACTERIA_V1V2	10	2.52425	0.322524	0.002438	0.031246	7	0.155556	0.376921
541	B.331696	Pseudolabrys taiwanensis	BACTERIA_V1V2	13	3.24676	0.339541	0.003803	0.048157	4	0.115385	0.552941
542	B.2584466	Mesorhizobium sp. 8	BACTERIA_V1V2	13	3.05988	0.333333	0.003376	0.039288	5	0.153846	0.469947
543	B.2748316	Capnocytophaga sp. oral taxon 902	BACTERIA_V1V2	11	2.59852	0.324052	0.002611	0.038471	0	0.127273	0.453087
544	B.94132	Ramlibacter tataouinensis	BACTERIA_V1V2	10	2.70486	0.316185	0.0023	0.026128	0	0.177778	0.328941
545	B.36805	Microbacterium aurum	BACTERIA_V1V2	14	3.94613	0.346203	0.004226	0.056775	9	0.131868	0.644692
546	B.2080742	Agromyces badenianii	BACTERIA_V1V2	12	4.82697	0.33891	0.003181	0.044997	3	0.151515	0.523871
547	B.1736675	Devosia sp. A16	BACTERIA_V1V2	12	3.33329	0.331314	0.003568	0.037181	16	0.166667	0.446746
548	B.2596828	Microlunatus elymi	BACTERIA_V1V2	16	3.60646	0.353359	0.006762	0.05574	17	0.1	0.662792

## Sheet: TS18_Co-occurrence_type
Species_1	Species_2	Co-occurrence
1	43	negative
1	276	negative
1	451	negative
1	468	negative
1	37	positive
1	51	positive
1	57	positive
1	289	positive
1	335	positive
1	367	positive
1	424	positive
1	426	positive
2	41	negative
2	88	negative
2	346	negative
2	385	negative
2	14	positive
2	44	positive
2	510	positive
2	542	positive
2	547	positive
3	87	negative
3	175	negative
3	216	negative
3	324	negative
3	333	negative
3	350	negative
3	450	negative
3	39	positive
3	317	positive
3	392	positive
3	499	positive
3	535	positive
4	212	negative
4	217	negative
4	250	negative
4	320	negative
4	21	positive
4	155	positive
4	162	positive
4	295	positive
4	309	positive
4	507	positive
4	525	positive
5	156	negative
5	216	negative
5	394	negative
5	460	negative
5	485	negative
5	25	positive
5	72	positive
5	226	positive
5	334	positive
5	347	positive
5	379	positive
5	448	positive
5	471	positive
5	547	positive
6	208	negative
6	255	negative
6	354	negative
6	432	negative
6	518	negative
6	32	positive
6	222	positive
6	252	positive
6	402	positive
6	423	positive
6	506	positive
7	127	negative
7	219	negative
7	253	negative
7	548	negative
7	100	positive
7	105	positive
7	256	positive
7	500	positive
8	160	negative
8	204	negative
8	215	negative
8	295	negative
8	510	negative
8	513	negative
8	118	positive
8	139	positive
8	211	positive
8	256	positive
8	364	positive
9	41	negative
9	46	negative
9	93	negative
9	283	negative
9	387	negative
9	491	negative
9	21	positive
9	44	positive
9	264	positive
9	278	positive
9	339	positive
9	497	positive
9	542	positive
10	110	negative
10	120	negative
10	135	negative
10	189	negative
10	197	negative
10	404	negative
10	76	positive
10	97	positive
10	142	positive
10	237	positive
10	417	positive
10	446	positive
11	148	negative
11	161	negative
11	378	negative
11	391	negative
11	395	negative
11	472	negative
11	518	negative
11	25	positive
11	53	positive
11	547	positive
12	41	negative
12	48	negative
12	114	negative
12	238	negative
12	316	negative
12	106	positive
12	203	positive
12	265	positive
12	317	positive
12	418	positive
12	498	positive
13	152	negative
13	243	negative
13	268	negative
13	526	negative
13	52	positive
13	54	positive
13	148	positive
13	177	positive
13	302	positive
13	303	positive
13	321	positive
13	407	positive
13	441	positive
14	86	negative
14	150	negative
14	163	negative
14	224	negative
14	300	negative
14	346	negative
14	395	negative
14	2	positive
14	50	positive
14	115	positive
14	191	positive
14	402	positive
15	34	negative
15	94	negative
15	187	negative
15	238	negative
15	262	negative
15	395	negative
15	523	negative
15	525	negative
15	152	positive
15	285	positive
15	389	positive
15	416	positive
15	461	positive
15	532	positive
15	538	positive
16	34	negative
16	98	negative
16	238	negative
16	420	negative
16	427	negative
16	474	negative
16	481	negative
16	492	negative
16	524	negative
16	26	positive
16	33	positive
16	77	positive
16	151	positive
16	259	positive
16	322	positive
17	21	negative
17	59	negative
17	136	negative
17	177	negative
17	339	negative
17	546	negative
17	42	positive
17	152	positive
17	182	positive
17	190	positive
17	364	positive
17	377	positive
17	501	positive
18	114	negative
18	127	negative
18	341	negative
18	379	negative
18	476	negative
18	88	positive
18	141	positive
18	166	positive
18	190	positive
18	285	positive
18	388	positive
18	526	positive
19	83	negative
19	131	negative
19	156	negative
19	223	negative
19	362	negative
19	494	negative
19	545	negative
19	546	negative
19	25	positive
19	231	positive
19	248	positive
19	364	positive
19	417	positive
19	447	positive
20	46	negative
20	194	negative
20	369	negative
20	444	negative
20	28	positive
20	111	positive
20	128	positive
20	265	positive
20	281	positive
20	325	positive
20	343	positive
20	344	positive
20	415	positive
20	418	positive
20	454	positive
20	493	positive
21	17	negative
21	98	negative
21	169	negative
21	210	negative
21	346	negative
21	387	negative
21	398	negative
21	520	negative
21	4	positive
21	9	positive
21	32	positive
21	82	positive
21	151	positive
21	162	positive
21	204	positive
21	205	positive
21	355	positive
21	422	positive
21	494	positive
21	533	positive
22	34	negative
22	83	negative
22	196	negative
22	223	negative
22	524	negative
22	81	positive
22	111	positive
22	264	positive
22	330	positive
22	447	positive
22	470	positive
23	213	negative
23	299	negative
23	236	positive
23	357	positive
23	368	positive
23	478	positive
23	487	positive
23	540	positive
24	124	negative
24	163	negative
24	210	negative
24	272	negative
24	283	negative
24	489	negative
24	529	negative
24	29	positive
24	50	positive
24	133	positive
24	157	positive
24	264	positive
24	278	positive
24	312	positive
24	314	positive
24	326	positive
24	403	positive
25	92	negative
25	216	negative
25	225	negative
25	297	negative
25	303	negative
25	5	positive
25	11	positive
25	19	positive
25	39	positive
25	89	positive
25	179	positive
25	231	positive
25	347	positive
26	65	negative
26	149	negative
26	186	negative
26	192	negative
26	360	negative
26	516	negative
26	16	positive
26	33	positive
26	222	positive
26	246	positive
26	318	positive
27	246	negative
27	318	negative
27	65	positive
27	195	positive
27	236	positive
27	351	positive
27	368	positive
27	397	positive
27	501	positive
28	46	negative
28	232	negative
28	369	negative
28	401	negative
28	20	positive
28	54	positive
28	144	positive
28	263	positive
28	281	positive
28	344	positive
28	546	positive
29	46	negative
29	56	negative
29	163	negative
29	24	positive
29	50	positive
29	60	positive
29	110	positive
29	403	positive
29	407	positive
29	485	positive
29	527	positive
29	545	positive
30	36	negative
30	431	negative
30	452	negative
30	458	negative
30	462	negative
30	523	negative
30	39	positive
30	67	positive
30	179	positive
30	305	positive
30	398	positive
31	128	negative
31	148	negative
31	181	negative
31	340	negative
31	470	negative
31	76	positive
31	167	positive
31	228	positive
31	283	positive
31	332	positive
31	477	positive
31	499	positive
31	535	positive
32	199	negative
32	212	negative
32	250	negative
32	277	negative
32	342	negative
32	385	negative
32	390	negative
32	399	negative
32	419	negative
32	6	positive
32	21	positive
32	162	positive
32	266	positive
32	393	positive
32	515	positive
33	45	negative
33	98	negative
33	149	negative
33	233	negative
33	481	negative
33	16	positive
33	26	positive
33	58	positive
33	113	positive
33	304	positive
34	15	negative
34	16	negative
34	22	negative
34	38	negative
34	81	negative
34	151	negative
34	461	negative
34	223	positive
34	307	positive
34	391	positive
35	299	negative
35	320	negative
35	327	negative
35	94	positive
35	123	positive
35	193	positive
35	197	positive
35	359	positive
35	371	positive
35	478	positive
35	523	positive
36	30	negative
36	44	negative
36	106	negative
36	284	negative
36	339	negative
36	528	negative
36	46	positive
36	154	positive
36	161	positive
37	129	negative
37	257	negative
37	415	negative
37	436	negative
37	451	negative
37	467	negative
37	468	negative
37	483	negative
37	1	positive
37	140	positive
37	197	positive
37	310	positive
38	34	negative
38	156	negative
38	432	negative
38	472	negative
38	481	negative
38	544	negative
38	77	positive
38	116	positive
38	222	positive
38	256	positive
38	448	positive
38	469	positive
39	159	negative
39	170	negative
39	241	negative
39	329	negative
39	494	negative
39	3	positive
39	25	positive
39	30	positive
39	195	positive
39	357	positive
39	405	positive
39	528	positive
40	363	negative
40	432	negative
40	465	negative
40	512	negative
40	55	positive
40	75	positive
40	81	positive
40	182	positive
40	207	positive
40	211	positive
40	266	positive
40	411	positive
40	421	positive
40	506	positive
41	2	negative
41	9	negative
41	12	negative
41	185	negative
41	203	negative
41	281	negative
41	510	negative
41	146	positive
41	290	positive
41	346	positive
41	369	positive
41	383	positive
41	518	positive
42	73	negative
42	292	negative
42	303	negative
42	376	negative
42	403	negative
42	472	negative
42	17	positive
42	76	positive
42	252	positive
42	461	positive
43	1	negative
43	101	negative
43	119	negative
43	140	negative
43	189	negative
43	363	positive
43	468	positive
43	512	positive
44	36	negative
44	88	negative
44	119	negative
44	138	negative
44	2	positive
44	9	positive
44	144	positive
44	314	positive
44	442	positive
44	542	positive
44	547	positive
45	33	negative
45	58	negative
45	68	negative
45	104	negative
45	106	negative
45	118	negative
45	245	negative
45	246	negative
45	454	negative
45	60	positive
45	84	positive
45	138	positive
45	156	positive
45	375	positive
45	394	positive
45	445	positive
46	9	negative
46	20	negative
46	28	negative
46	29	negative
46	144	negative
46	265	negative
46	293	negative
46	294	negative
46	510	negative
46	36	positive
46	150	positive
46	300	positive
46	458	positive
47	80	negative
47	94	negative
47	107	negative
47	185	negative
47	191	negative
47	328	negative
47	379	negative
47	139	positive
47	190	positive
47	286	positive
47	290	positive
47	315	positive
47	374	positive
47	438	positive
47	467	positive
47	537	positive
48	12	negative
48	183	negative
48	204	negative
48	285	negative
48	339	negative
48	403	negative
48	404	negative
48	497	negative
48	541	negative
48	49	positive
48	241	positive
48	289	positive
49	65	negative
49	125	negative
49	144	negative
49	186	negative
49	236	negative
49	357	negative
49	457	negative
49	487	negative
49	528	negative
49	536	negative
49	48	positive
49	335	positive
50	251	negative
50	254	negative
50	306	negative
50	346	negative
50	446	negative
50	491	negative
50	14	positive
50	24	positive
50	29	positive
50	295	positive
50	376	positive
51	292	negative
51	374	negative
51	480	negative
51	490	negative
51	1	positive
51	64	positive
51	279	positive
51	308	positive
51	413	positive
52	152	negative
52	275	negative
52	338	negative
52	372	negative
52	377	negative
52	438	negative
52	475	negative
52	13	positive
52	68	positive
52	180	positive
52	456	positive
53	124	negative
53	224	negative
53	432	negative
53	458	negative
53	11	positive
53	72	positive
53	81	positive
53	412	positive
53	448	positive
53	453	positive
53	539	positive
54	105	negative
54	194	negative
54	13	positive
54	28	positive
54	67	positive
54	73	positive
54	74	positive
54	208	positive
54	263	positive
54	337	positive
54	414	positive
54	464	positive
54	546	positive
54	548	positive
55	109	negative
55	465	negative
55	489	negative
55	517	negative
55	523	negative
55	40	positive
55	121	positive
55	133	positive
55	188	positive
55	260	positive
55	358	positive
56	29	negative
56	63	negative
56	125	negative
56	337	negative
56	344	negative
56	485	negative
56	247	positive
56	334	positive
56	347	positive
56	366	positive
56	425	positive
56	502	positive
56	523	positive
57	157	negative
57	409	negative
57	430	negative
57	451	negative
57	468	negative
57	1	positive
57	123	positive
57	249	positive
57	280	positive
57	371	positive
57	381	positive
57	424	positive
57	530	positive
58	45	negative
58	90	negative
58	186	negative
58	229	negative
58	233	negative
58	276	negative
58	490	negative
58	496	negative
58	33	positive
58	118	positive
58	308	positive
58	424	positive
58	448	positive
59	17	negative
59	98	negative
59	392	negative
59	501	negative
59	511	negative
59	106	positive
59	109	positive
59	112	positive
59	193	positive
59	261	positive
59	287	positive
59	349	positive
59	359	positive
59	508	positive
60	118	negative
60	244	negative
60	250	negative
60	318	negative
60	29	positive
60	45	positive
60	294	positive
60	295	positive
60	312	positive
60	326	positive
60	392	positive
60	445	positive
61	187	negative
61	198	negative
61	226	negative
61	336	negative
61	390	negative
61	396	negative
61	471	negative
61	141	positive
61	275	positive
61	482	positive
61	532	positive
62	308	negative
62	402	negative
62	423	negative
62	321	positive
62	490	positive
62	516	positive
62	518	positive
63	56	negative
63	205	negative
63	268	negative
63	309	negative
63	341	negative
63	366	negative
63	502	negative
63	192	positive
63	195	positive
63	206	positive
63	217	positive
63	218	positive
63	255	positive
63	279	positive
63	352	positive
63	516	positive
64	199	negative
64	261	negative
64	287	negative
64	429	negative
64	450	negative
64	512	negative
64	541	negative
64	51	positive
64	383	positive
64	484	positive
64	511	positive
64	531	positive
65	26	negative
65	49	negative
65	259	negative
65	318	negative
65	345	negative
65	27	positive
65	305	positive
65	464	positive
65	479	positive
65	488	positive
65	514	positive
66	220	negative
66	225	negative
66	263	negative
66	291	negative
66	354	negative
66	386	negative
66	101	positive
66	116	positive
66	273	positive
66	334	positive
66	347	positive
67	252	negative
67	288	negative
67	338	negative
67	431	negative
67	506	negative
67	30	positive
67	54	positive
67	125	positive
67	192	positive
67	208	positive
67	336	positive
67	396	positive
68	45	negative
68	88	negative
68	146	negative
68	394	negative
68	458	negative
68	52	positive
68	104	positive
68	493	positive
69	110	negative
69	117	negative
69	132	negative
69	269	negative
69	344	negative
69	370	negative
69	437	negative
69	332	positive
69	349	positive
69	443	positive
69	473	positive
70	198	negative
70	210	negative
70	272	negative
70	121	positive
70	278	positive
70	310	positive
70	456	positive
70	460	positive
70	527	positive
70	534	positive
71	116	negative
71	189	negative
71	408	negative
71	500	negative
71	531	negative
71	86	positive
71	143	positive
71	258	positive
71	306	positive
71	432	positive
72	117	negative
72	218	negative
72	255	negative
72	297	negative
72	362	negative
72	518	negative
72	5	positive
72	53	positive
72	247	positive
72	547	positive
73	42	negative
73	75	negative
73	105	negative
73	137	negative
73	256	negative
73	335	negative
73	54	positive
73	125	positive
73	208	positive
73	287	positive
73	337	positive
73	354	positive
73	468	positive
73	472	positive
73	544	positive
74	105	negative
74	194	negative
74	267	negative
74	310	negative
74	381	negative
74	401	negative
74	440	negative
74	54	positive
74	142	positive
74	208	positive
74	219	positive
74	284	positive
74	468	positive
75	73	negative
75	202	negative
75	265	negative
75	404	negative
75	429	negative
75	508	negative
75	541	negative
75	40	positive
75	116	positive
75	134	positive
75	211	positive
76	125	negative
76	128	negative
76	255	negative
76	265	negative
76	293	negative
76	337	negative
76	404	negative
76	10	positive
76	31	positive
76	42	positive
76	99	positive
76	237	positive
76	311	positive
76	435	positive
76	505	positive
77	125	negative
77	223	negative
77	233	negative
77	263	negative
77	464	negative
77	492	negative
77	16	positive
77	38	positive
77	232	positive
77	256	positive
77	288	positive
77	318	positive
77	333	positive
78	97	negative
78	114	negative
78	260	negative
78	494	negative
78	89	positive
78	95	positive
78	166	positive
78	212	positive
78	399	positive
78	526	positive
79	92	negative
79	96	negative
79	213	negative
79	270	negative
79	315	negative
79	324	negative
79	370	negative
79	416	negative
79	351	positive
79	540	positive
80	47	negative
80	91	negative
80	150	negative
80	175	negative
80	271	negative
80	446	negative
80	307	positive
80	371	positive
80	376	positive
81	34	negative
81	124	negative
81	196	negative
81	362	negative
81	378	negative
81	432	negative
81	465	negative
81	489	negative
81	22	positive
81	40	positive
81	53	positive
81	122	positive
81	264	positive
81	447	positive
81	506	positive
81	515	positive
82	272	negative
82	380	negative
82	398	negative
82	466	negative
82	21	positive
82	267	positive
82	278	positive
82	365	positive
82	504	positive
83	19	negative
83	22	negative
83	104	negative
83	118	negative
83	179	negative
83	161	positive
83	178	positive
83	209	positive
83	243	positive
83	491	positive
83	513	positive
84	244	negative
84	414	negative
84	521	negative
84	45	positive
84	122	positive
84	194	positive
84	275	positive
84	298	positive
84	392	positive
84	397	positive
84	444	positive
84	445	positive
85	91	negative
85	147	negative
85	187	negative
85	221	negative
85	247	negative
85	486	negative
85	141	positive
85	202	positive
85	215	positive
85	275	positive
85	317	positive
85	389	positive
85	527	positive
86	14	negative
86	126	negative
86	173	negative
86	264	negative
86	308	negative
86	393	negative
86	493	negative
86	71	positive
86	199	positive
86	306	positive
86	380	positive
86	458	positive
86	491	positive
87	3	negative
87	145	negative
87	347	negative
87	528	negative
87	540	negative
87	290	positive
87	297	positive
87	316	positive
87	350	positive
87	378	positive
87	437	positive
88	2	negative
88	44	negative
88	68	negative
88	127	negative
88	142	negative
88	448	negative
88	547	negative
88	18	positive
88	124	positive
88	141	positive
88	194	positive
88	377	positive
88	394	positive
88	440	positive
89	215	negative
89	225	negative
89	329	negative
89	409	negative
89	494	negative
89	513	negative
89	25	positive
89	78	positive
89	95	positive
89	118	positive
89	313	positive
89	334	positive
89	424	positive
89	471	positive
89	517	positive
90	58	negative
90	126	negative
90	308	negative
90	323	negative
90	426	negative
90	493	negative
90	530	negative
90	360	positive
90	374	positive
90	410	positive
90	420	positive
90	430	positive
91	80	negative
91	85	negative
91	107	negative
91	197	negative
91	295	negative
91	298	negative
91	382	negative
91	457	negative
91	211	positive
91	221	positive
91	251	positive
91	271	positive
91	318	positive
91	417	positive
91	446	positive
92	25	negative
92	79	negative
92	106	negative
92	177	negative
92	184	negative
92	284	negative
92	339	negative
92	357	negative
92	542	negative
92	260	positive
93	9	negative
93	111	negative
93	113	negative
93	278	negative
93	325	negative
93	98	positive
93	138	positive
93	283	positive
93	406	positive
93	435	positive
93	505	positive
94	15	negative
94	47	negative
94	358	negative
94	467	negative
94	35	positive
94	223	positive
94	262	positive
94	307	positive
94	371	positive
94	449	positive
94	507	positive
95	146	negative
95	148	negative
95	326	negative
95	422	negative
95	481	negative
95	516	negative
95	78	positive
95	89	positive
95	203	positive
95	304	positive
95	353	positive
96	79	negative
96	226	negative
96	361	negative
96	533	negative
96	117	positive
96	174	positive
96	182	positive
96	206	positive
96	315	positive
96	356	positive
96	389	positive
96	416	positive
97	78	negative
97	124	negative
97	135	negative
97	203	negative
97	249	negative
97	439	negative
97	459	negative
97	10	positive
97	142	positive
98	16	negative
98	21	negative
98	33	negative
98	59	negative
98	213	negative
98	309	negative
98	322	negative
98	355	negative
98	93	positive
98	149	positive
98	406	positive
98	501	positive
99	100	negative
99	200	negative
99	201	negative
99	292	negative
99	319	negative
99	340	negative
99	460	negative
99	480	negative
99	509	negative
99	76	positive
99	167	positive
99	172	positive
99	237	positive
99	251	positive
99	425	positive
100	99	negative
100	127	negative
100	164	negative
100	281	negative
100	409	negative
100	477	negative
100	7	positive
100	102	positive
100	166	positive
100	174	positive
100	181	positive
100	197	positive
100	232	positive
101	43	negative
101	142	negative
101	386	negative
101	409	negative
101	472	negative
101	513	negative
101	66	positive
101	105	positive
101	256	positive
101	313	positive
101	369	positive
101	383	positive
102	160	negative
102	284	negative
102	305	negative
102	328	negative
102	405	negative
102	453	negative
102	536	negative
102	539	negative
102	547	negative
102	100	positive
102	123	positive
102	154	positive
102	280	positive
102	286	positive
102	333	positive
102	440	positive
102	529	positive
103	123	negative
103	200	negative
103	286	negative
103	355	negative
103	371	negative
103	480	negative
103	529	negative
103	541	negative
103	167	positive
103	539	positive
104	45	negative
104	83	negative
104	146	negative
104	149	negative
104	156	negative
104	218	negative
104	296	negative
104	68	positive
104	106	positive
105	54	negative
105	73	negative
105	74	negative
105	263	negative
105	409	negative
105	464	negative
105	544	negative
105	7	positive
105	101	positive
105	137	positive
105	401	positive
106	36	negative
106	45	negative
106	92	negative
106	161	negative
106	445	negative
106	481	negative
106	12	positive
106	59	positive
106	104	positive
106	227	positive
106	261	positive
106	418	positive
106	508	positive
107	47	negative
107	91	negative
107	168	negative
107	245	negative
107	271	negative
107	330	negative
107	358	negative
107	436	negative
107	537	negative
107	185	positive
107	209	positive
107	295	positive
107	402	positive
108	154	negative
108	387	negative
108	449	negative
108	157	positive
108	314	positive
108	415	positive
108	451	positive
108	498	positive
108	538	positive
109	55	negative
109	182	negative
109	206	negative
109	316	negative
109	411	negative
109	437	negative
109	511	negative
109	59	positive
109	261	positive
109	363	positive
109	418	positive
109	429	positive
110	10	negative
110	69	negative
110	268	negative
110	341	negative
110	477	negative
110	29	positive
110	255	positive
110	279	positive
110	301	positive
110	367	positive
110	456	positive
111	93	negative
111	196	negative
111	425	negative
111	443	negative
111	523	negative
111	20	positive
111	22	positive
111	113	positive
111	188	positive
111	274	positive
111	293	positive
111	327	positive
111	337	positive
111	416	positive
111	470	positive
112	169	negative
112	294	negative
112	301	negative
112	302	negative
112	343	negative
112	392	negative
112	427	negative
112	520	negative
112	59	positive
112	221	positive
112	268	positive
112	300	positive
112	450	positive
113	93	negative
113	375	negative
113	397	negative
113	434	negative
113	496	negative
113	33	positive
113	111	positive
113	259	positive
113	274	positive
113	330	positive
113	493	positive
114	12	negative
114	18	negative
114	78	negative
114	202	negative
114	228	negative
114	277	negative
114	285	negative
114	429	negative
114	498	negative
114	541	negative
114	147	positive
114	476	positive
115	143	negative
115	163	negative
115	346	negative
115	414	negative
115	417	negative
115	483	negative
115	521	negative
115	14	positive
115	162	positive
115	267	positive
115	295	positive
115	310	positive
116	71	negative
116	178	negative
116	199	negative
116	257	negative
116	276	negative
116	354	negative
116	544	negative
116	38	positive
116	66	positive
116	75	positive
116	140	positive
116	412	positive
117	69	negative
117	72	negative
117	176	negative
117	332	negative
117	442	negative
117	540	negative
117	96	positive
117	171	positive
117	255	positive
117	269	positive
117	325	positive
117	362	positive
117	495	positive
118	45	negative
118	60	negative
118	83	negative
118	130	negative
118	156	negative
118	215	negative
118	233	negative
118	275	negative
118	298	negative
118	372	negative
118	406	negative
118	513	negative
118	535	negative
118	8	positive
118	58	positive
118	89	positive
118	334	positive
119	43	negative
119	44	negative
119	142	negative
119	281	negative
119	415	negative
119	138	positive
119	194	positive
119	197	positive
119	301	positive
119	352	positive
119	383	positive
119	520	positive
120	10	negative
120	127	negative
120	142	negative
120	164	negative
120	341	negative
120	409	negative
120	477	negative
120	189	positive
120	373	positive
120	500	positive
120	520	positive
121	210	negative
121	227	negative
121	272	negative
121	283	negative
121	466	negative
121	499	negative
121	55	positive
121	70	positive
121	260	positive
121	340	positive
121	358	positive
121	393	positive
122	170	negative
122	180	negative
122	390	negative
122	414	negative
122	522	negative
122	81	positive
122	84	positive
122	133	positive
122	389	positive
122	444	positive
122	445	positive
122	461	positive
122	504	positive
123	103	negative
123	215	negative
123	536	negative
123	35	positive
123	57	positive
123	102	positive
123	313	positive
123	333	positive
123	523	positive
124	24	negative
124	53	negative
124	81	negative
124	97	negative
124	134	negative
124	211	negative
124	235	negative
124	327	negative
124	358	negative
124	453	negative
124	515	negative
124	539	negative
124	88	positive
124	384	positive
124	399	positive
124	489	positive
124	529	positive
125	49	negative
125	56	negative
125	76	negative
125	77	negative
125	268	negative
125	502	negative
125	67	positive
125	73	positive
125	263	positive
125	303	positive
125	376	positive
125	457	positive
125	546	positive
126	86	negative
126	90	negative
126	130	negative
126	146	negative
126	253	negative
126	380	negative
126	410	negative
126	293	positive
126	304	positive
126	310	positive
126	371	positive
126	530	positive
127	7	negative
127	18	negative
127	88	negative
127	100	negative
127	120	negative
127	141	negative
127	174	negative
127	440	negative
127	495	negative
127	142	positive
127	409	positive
128	31	negative
128	76	negative
128	444	negative
128	20	positive
128	217	positive
128	255	positive
128	265	positive
128	303	positive
128	325	positive
128	354	positive
128	362	positive
128	545	positive
128	546	positive
129	37	negative
129	302	negative
129	396	negative
129	484	negative
129	254	positive
129	415	positive
129	429	positive
129	438	positive
129	503	positive
130	118	negative
130	126	negative
130	193	negative
130	313	negative
130	322	negative
130	167	positive
130	178	positive
130	254	positive
130	291	positive
130	306	positive
130	385	positive
130	491	positive
130	543	positive
131	19	negative
131	195	negative
131	360	negative
131	364	negative
131	383	negative
131	398	negative
131	411	negative
131	447	negative
131	453	negative
131	501	negative
131	216	positive
131	386	positive
131	431	positive
131	462	positive
132	69	negative
132	477	negative
132	512	negative
132	173	positive
132	188	positive
132	356	positive
132	367	positive
132	456	positive
132	470	positive
132	527	positive
132	534	positive
133	196	negative
133	272	negative
133	455	negative
133	522	negative
133	24	positive
133	55	positive
133	122	positive
133	188	positive
133	264	positive
133	393	positive
133	527	positive
133	532	positive
134	124	negative
134	202	negative
134	296	negative
134	388	negative
134	457	negative
134	479	negative
134	75	positive
134	151	positive
134	205	positive
134	211	positive
134	222	positive
134	515	positive
135	10	negative
135	97	negative
135	142	negative
135	258	negative
135	321	negative
135	350	negative
135	203	positive
135	373	positive
135	381	positive
135	408	positive
135	424	positive
136	17	negative
136	167	negative
136	182	negative
136	364	negative
136	389	negative
136	423	negative
136	520	negative
136	177	positive
136	193	positive
136	204	positive
136	442	positive
136	480	positive
136	490	positive
136	525	positive
137	73	negative
137	160	negative
137	336	negative
137	464	negative
137	514	negative
137	105	positive
137	331	positive
137	335	positive
137	353	positive
137	421	positive
137	423	positive
138	44	negative
138	168	negative
138	327	negative
138	45	positive
138	93	positive
138	119	positive
138	149	positive
138	194	positive
138	209	positive
138	368	positive
138	383	positive
138	406	positive
139	178	negative
139	185	negative
139	240	negative
139	281	negative
139	535	negative
139	8	positive
139	47	positive
139	211	positive
139	232	positive
139	256	positive
139	401	positive
139	447	positive
140	43	negative
140	178	negative
140	282	negative
140	429	negative
140	468	negative
140	543	negative
140	37	positive
140	116	positive
140	401	positive
141	127	negative
141	230	negative
141	464	negative
141	492	negative
141	548	negative
141	18	positive
141	61	positive
141	85	positive
141	88	positive
141	190	positive
141	267	positive
141	495	positive
142	88	negative
142	101	negative
142	119	negative
142	120	negative
142	135	negative
142	189	negative
142	194	negative
142	197	negative
142	348	negative
142	10	positive
142	74	positive
142	97	positive
142	127	positive
142	221	positive
142	409	positive
142	436	positive
142	486	positive
143	115	negative
143	408	negative
143	428	negative
143	447	negative
143	500	negative
143	71	positive
143	219	positive
143	241	positive
143	483	positive
143	522	positive
143	548	positive
144	46	negative
144	49	negative
144	523	negative
144	28	positive
144	44	positive
144	160	positive
144	305	positive
144	312	positive
144	314	positive
144	407	positive
144	536	positive
145	87	negative
145	161	negative
145	169	negative
145	241	negative
145	297	negative
145	378	negative
145	184	positive
145	231	positive
145	405	positive
145	428	positive
145	533	positive
145	542	positive
146	68	negative
146	95	negative
146	104	negative
146	126	negative
146	179	negative
146	203	negative
146	274	negative
146	308	negative
146	418	negative
146	454	negative
146	41	positive
147	85	negative
147	155	negative
147	203	negative
147	243	negative
147	275	negative
147	355	negative
147	431	negative
147	482	negative
147	498	negative
147	541	negative
147	114	positive
147	302	positive
147	417	positive
147	453	positive
148	11	negative
148	31	negative
148	95	negative
148	212	negative
148	317	negative
148	503	negative
148	13	positive
148	350	positive
148	437	positive
149	26	negative
149	33	negative
149	104	negative
149	222	negative
149	246	negative
149	98	positive
149	138	positive
149	195	positive
149	296	positive
149	352	positive
149	398	positive
149	427	positive
150	14	negative
150	80	negative
150	328	negative
150	376	negative
150	484	negative
150	46	positive
150	159	positive
150	172	positive
150	225	positive
150	258	positive
150	329	positive
150	446	positive
151	34	negative
151	180	negative
151	255	negative
151	279	negative
151	362	negative
151	387	negative
151	427	negative
151	465	negative
151	16	positive
151	21	positive
151	134	positive
151	268	positive
151	504	positive
152	13	negative
152	52	negative
152	307	negative
152	371	negative
152	376	negative
152	15	positive
152	17	positive
152	190	positive
152	254	positive
152	461	positive
153	201	negative
153	212	negative
153	248	negative
153	285	negative
153	293	negative
153	330	negative
153	373	negative
153	404	negative
153	497	negative
153	238	positive
153	375	positive
154	108	negative
154	281	negative
154	498	negative
154	547	negative
154	36	positive
154	102	positive
154	161	positive
154	181	positive
154	352	positive
154	391	positive
154	395	positive
154	518	positive
154	529	positive
155	147	negative
155	192	negative
155	436	negative
155	437	negative
155	4	positive
155	162	positive
155	185	positive
155	204	positive
155	267	positive
155	275	positive
155	309	positive
155	359	positive
155	382	positive
155	443	positive
156	5	negative
156	19	negative
156	38	negative
156	104	negative
156	118	negative
156	448	negative
156	45	positive
156	296	positive
156	391	positive
156	481	positive
156	485	positive
157	57	negative
157	169	negative
157	387	negative
157	424	negative
157	439	negative
157	24	positive
157	108	positive
157	164	positive
157	314	positive
157	326	positive
157	405	positive
157	409	positive
157	451	positive
157	496	positive
157	533	positive
158	296	negative
158	352	negative
158	369	negative
158	488	negative
158	518	negative
158	222	positive
158	237	positive
158	246	positive
158	259	positive
158	274	positive
158	299	positive
158	327	positive
158	423	positive
159	39	negative
159	412	negative
159	484	negative
159	531	negative
159	150	positive
159	175	positive
159	450	positive
159	521	positive
160	8	negative
160	102	negative
160	137	negative
160	316	negative
160	345	negative
160	401	negative
160	144	positive
160	233	positive
160	312	positive
160	361	positive
160	510	positive
160	533	positive
160	536	positive
161	11	negative
161	106	negative
161	145	negative
161	497	negative
161	36	positive
161	83	positive
161	154	positive
161	378	positive
162	208	negative
162	272	negative
162	297	negative
162	380	negative
162	491	negative
162	543	negative
162	4	positive
162	21	positive
162	32	positive
162	115	positive
162	155	positive
162	200	positive
162	322	positive
162	359	positive
162	422	positive
162	428	positive
162	478	positive
163	14	negative
163	24	negative
163	29	negative
163	115	negative
163	215	negative
163	294	negative
163	510	negative
163	528	negative
163	395	positive
163	521	positive
164	100	negative
164	120	negative
164	174	negative
164	181	negative
164	255	negative
164	269	negative
164	413	negative
164	530	negative
164	157	positive
164	338	positive
164	375	positive
164	409	positive
164	477	positive
164	494	positive
164	533	positive
165	191	negative
165	379	negative
165	402	negative
165	199	positive
165	250	positive
165	285	positive
165	286	positive
165	330	positive
165	419	positive
165	537	positive
166	191	negative
166	237	negative
166	299	negative
166	494	negative
166	18	positive
166	78	positive
166	100	positive
166	184	positive
166	232	positive
166	313	positive
166	369	positive
166	480	positive
167	136	negative
167	193	negative
[truncated: 4,589 more rows]

## Sheet: Metadata
Ecological interpretation of co-occurrence network metrics
	Network_metrics.ITS_V1V2 dataset
		Node_ID	Node identification within the network, equivalent to an OTU
		Label	OTU ID
		Taxonomy	Taxonomic assignment at the species level
		Group	Main group of the given OTU (Fungi / Bacteria)
		Degree_centrality	Co-occurrence frequency of an node with others in the network
		Weighted_degree_centrality	Co-occurrence frequency of an node with others in the network, taking into account the number of co-occurrences between OTU pairs (i.e., analogous to interaction intensity)
		Closeness_centrality	This metric measures how central is a node along the entire network
		Betweeness_centrality	This metric measures the frequency of a node that interconnects other two nodes in the network
		Keystone	An score that quantifies the relative importance of a node to conduct into an extinction cascade effect when it is eliminated from the network
		Module_ID	The module a node belongs in
		Clustering_coefficient	This metric measures the capacity of a node to cluster with others, i.e., the contribution of an OTU to aggregate other OTUs in sub-communities within the metacommunity
		Eigenvector_centrality	This metric measures the contribution of a node to construct the co-occurrence network outcome
	Co-occurrence_type
		Species_1	Node_ID from the Network_metrics dataset
		Species_2	Node_ID from the Network_metrics dataset
		Co-occurrence	Positive (co-occurrence) or negative (co-exclusion)
