# Supplementary material for: Chitosan reduces naturally occurring plant pathogenic fungi and increases nematophagous fungus Purpureocillium in soil under field conditions
Source: Frontiers journal article supplement (doi:10.3389/fagro.2024.1502402), 2025-01-22
Supplement: Table_4.xlsx [file Table_4.xlsx]

## Sheet: net_metrics.ITSV3V4
Id	Label	Taxonomy	Group	Degree_centrality	Weighted_degree_centrality	Closeness_centrality	Betweeness_centrality	Keystone	Module_ID	Clustering_coefficient	Eigenvector_centrality
213	B.1619153	Cohnella sp. LGH	BACTERIA_V3V4	15	2.96629	0.337662	0.009229	0.086051	12	0.12381	1
104	B.305	Ralstonia solanacearum	BACTERIA_V3V4	14	3.37278	0.339217	0.008516	0.082368	13	0.142857	0.970686
13	F.38033	Chaetomium globosum	FUNGI	13	3.84866	0.335357	0.008582	0.08125	2	0.102564	0.943136
403	B.2764186	Sphingomonas sabuli	BACTERIA_V3V4	14	3.96819	0.340524	0.009796	0.081027	0	0.120879	0.959593
84	B.2904253	Lysobacter sp. 5GHs7-4	BACTERIA_V3V4	15	4.66079	0.350515	0.012178	0.080553	9	0.085714	0.964012
180	B.960	Bacteriovorax stolpii	BACTERIA_V3V4	14	3.92796	0.347484	0.011295	0.080156	6	0.065934	0.961853
276	B.661481	Flavisolibacter ginsenosidimutans	BACTERIA_V3V4	15	3.09971	0.345853	0.011772	0.074906	2	0.047619	0.91125
212	B.107709	Opitutus terrae	BACTERIA_V3V4	12	2.83523	0.333333	0.006603	0.072335	9	0.136364	0.846299
435	B.1302376	Candidatus Pseudomonas adelgestsugas	BACTERIA_V3V4	11	2.94124	0.341313	0.007973	0.072035	9	0.109091	0.847141
182	B.2991075	Sphingomonas sp. S6-11	BACTERIA_V3V4	12	4.21095	0.330344	0.005899	0.071606	6	0.166667	0.84645
131	B.573	Klebsiella pneumoniae	BACTERIA_V3V4	12	3.29162	0.331334	0.006914	0.070585	10	0.106061	0.832562
183	B.2995170	Luteolibacter sp. SL250	BACTERIA_V3V4	12	2.71467	0.332581	0.007019	0.07041	0	0.090909	0.825156
344	B.47883	Pseudomonas synxantha	BACTERIA_V3V4	12	3.62032	0.337405	0.007649	0.070215	10	0.121212	0.829369
90	B.2502784	Flavobacterium cerinum	BACTERIA_V3V4	12	3.16185	0.341049	0.008432	0.068809	4	0.090909	0.822463
139	B.86664	Priestia flexa	BACTERIA_V3V4	12	3.14055	0.334089	0.006652	0.068769	13	0.151515	0.824186
78	B.2502779	Pseudocnuella soli	BACTERIA_V3V4	12	3.05301	0.33689	0.007593	0.067708	4	0.106061	0.812618
431	B.2789216	Labrys sp. KNU-23	BACTERIA_V3V4	13	4.0968	0.339739	0.009172	0.067618	2	0.102564	0.823446
254	B.1750	Arachnia propionica	BACTERIA_V3V4	12	2.90354	0.338179	0.008109	0.067548	1	0.106061	0.818303
192	B.2933797	Blastococcus sp. PRF04-17	BACTERIA_V3V4	12	4.28239	0.331832	0.006877	0.067413	4	0.136364	0.808825
9	F.1187941	Alternaria rosae	FUNGI	12	4.50619	0.335357	0.006072	0.067287	9	0.166667	0.808261
438	B.106370	Frankia casuarinae	BACTERIA_V3V4	12	3.07367	0.332081	0.006385	0.067249	8	0.121212	0.79233
307	B.2352	Flexistipes sinusarabici	BACTERIA_V3V4	13	3.42036	0.333585	0.008657	0.067232	10	0.128205	0.800427
299	B.1353976	Neochlamydia sp. S13	BACTERIA_V3V4	12	2.60605	0.329851	0.006477	0.066323	2	0.106061	0.786285
45	F.60172	Penicillium solitum	FUNGI	13	3.12741	0.334595	0.009604	0.066267	13	0.089744	0.802706
371	B.1391654	Labilithrix luteola	BACTERIA_V3V4	13	3.08681	0.33689	0.009378	0.065949	9	0.076923	0.804207
52	F.1485682	Mitosporidium daphniae	FUNGI	11	3.22347	0.331832	0.00572	0.065659	6	0.090909	0.772496
367	B.1547283	Bacillus weihaiensis	BACTERIA_V3V4	11	3.20093	0.330591	0.005607	0.06561	6	0.127273	0.766988
316	B.1325564	Nitrospira japonica	BACTERIA_V3V4	13	2.89599	0.33689	0.009519	0.065354	0	0.076923	0.795522
211	B.2507935	Cohnella abietis	BACTERIA_V3V4	13	4.16796	0.343434	0.009951	0.064967	10	0.051282	0.801324
436	B.2842453	Amycolatopsis aidingensis	BACTERIA_V3V4	12	2.7925	0.327407	0.006757	0.064601	5	0.136364	0.769672
362	B.2849779	Aquihabitans sp. G128	BACTERIA_V3V4	13	3.9233	0.33792	0.009378	0.064408	5	0.089744	0.780311
244	B.46677	Pseudomonas agarici	BACTERIA_V3V4	12	3.30555	0.327893	0.006297	0.064206	13	0.166667	0.767974
189	B.300028	Rhodococcus triatomae	BACTERIA_V3V4	12	3.77493	0.338697	0.007226	0.063985	2	0.106061	0.784216
28	F.5518	Fusarium graminearum	FUNGI	11	3.74351	0.32644	0.00572	0.063637	9	0.109091	0.751551
68	B.94254	Dyadobacter fermentans	BACTERIA_V3V4	12	3.66974	0.32644	0.006092	0.063591	5	0.166667	0.767539
185	B.985	Cytophaga hutchinsonii	BACTERIA_V3V4	13	3.50685	0.333333	0.008382	0.063297	3	0.102564	0.776028
117	B.470	Acinetobacter baumannii	BACTERIA_V3V4	12	3.70847	0.340524	0.009669	0.062918	9	0.045455	0.770624
377	B.453783	Lysobacter soli	BACTERIA_V3V4	11	3.13267	0.333333	0.006751	0.062727	6	0.072727	0.762237
243	B.2598458	Cohnella cholangitidis	BACTERIA_V3V4	11	2.89985	0.340524	0.006388	0.062539	9	0.054545	0.752217
107	B.382	Sinorhizobium meliloti	BACTERIA_V3V4	11	3.12758	0.336377	0.00684	0.062467	6	0.054545	0.750349
432	B.692036	Tuwongella immobilis	BACTERIA_V3V4	13	2.51553	0.33792	0.011148	0.062356	12	0.064103	0.781885
38	F.746128	Aspergillus fumigatus	FUNGI	12	2.36875	0.324285	0.006153	0.062226	13	0.121212	0.751892
41	F.2060973	Purpureocillium takamizusanense	FUNGI	12	2.9317	0.330591	0.006693	0.062202	9	0.151515	0.754435
109	B.2884022	Capillimicrobium parvum	BACTERIA_V3V4	12	2.93919	0.341841	0.009305	0.061654	9	0.060606	0.755282
60	B.2220073	Bdellovibrio sp. NC01	BACTERIA_V3V4	12	2.68149	0.333585	0.007798	0.061553	4	0.075758	0.758537
303	B.362787	Candidatus Protochlamydia amoebophila	BACTERIA_V3V4	11	2.67612	0.325959	0.006578	0.061313	2	0.072727	0.74181
287	B.354356	Niastella koreensis	BACTERIA_V3V4	12	3.2639	0.335357	0.007366	0.060803	6	0.136364	0.745787
162	B.2528020	Poriferisphaera corsica	BACTERIA_V3V4	12	2.97815	0.324047	0.006421	0.060715	10	0.090909	0.736601
67	B.69666	Caulobacter mirabilis	BACTERIA_V3V4	10	3.2869	0.325239	0.004097	0.060478	13	0.133333	0.709466
62	B.2732067	Usitatibacter rugosus	BACTERIA_V3V4	11	3.05657	0.338957	0.00633	0.060371	4	0.072727	0.726812
30	F.43433	Tricharina praecox	FUNGI	12	3.55051	0.336634	0.008024	0.060357	0	0.106061	0.738647
380	B.48296	Acinetobacter pittii	BACTERIA_V3V4	13	3.36861	0.335611	0.009814	0.060346	3	0.102564	0.749054
439	B.1306526	Flavobacterium commune	BACTERIA_V3V4	11	3.41389	0.325718	0.005375	0.060236	10	0.163636	0.721001
137	B.2769491	Massilia sp. LPB0304	BACTERIA_V3V4	12	3.31982	0.323336	0.006406	0.060002	7	0.121212	0.751253
379	B.2686094	Terricaulis silvestris	BACTERIA_V3V4	10	2.55618	0.330591	0.005742	0.059838	13	0.155556	0.70696
437	B.364410	Granulibacter bethesdensis	BACTERIA_V3V4	11	2.37861	0.331334	0.005891	0.059837	0	0.090909	0.723814
24	F.13684	Parastagonospora nodorum	FUNGI	11	2.76752	0.327407	0.006291	0.059747	13	0.163636	0.719769
21	F.1093900	Thyridium curvatum	FUNGI	11	3.30083	0.331086	0.005851	0.059393	9	0.127273	0.716997
178	B.2728835	Luteolibacter luteus	BACTERIA_V3V4	12	3.28491	0.335611	0.008465	0.059377	11	0.060606	0.724432
355	B.113562	Actinoplanes derwentensis	BACTERIA_V3V4	11	3.36377	0.335357	0.006535	0.059173	9	0.109091	0.723009
197	B.2995304	Nannocystis sp. fl3	BACTERIA_V3V4	12	3.41723	0.341841	0.009049	0.059075	10	0.060606	0.739267
54	F.749465	Boeremia exigua	FUNGI	10	3.219	0.322157	0.004526	0.058412	0	0.088889	0.681925
283	B.661488	Pseudobacter ginsenosidimutans	BACTERIA_V3V4	13	3.99056	0.333837	0.009297	0.058305	3	0.115385	0.74393
175	B.2986837	Flavobacterium sp. N502536	BACTERIA_V3V4	9	2.35189	0.320058	0.003498	0.058178	9	0.111111	0.675755
239	B.91604	Candidatus Paracaedibacter acanthamoebae	BACTERIA_V3V4	10	2.79167	0.317529	0.004424	0.058061	0	0.133333	0.679049
264	B.1852	Saccharomonospora viridis	BACTERIA_V3V4	12	3.00495	0.333837	0.00758	0.058037	9	0.136364	0.714663
333	B.395922	Coraliomargarita akajimensis	BACTERIA_V3V4	10	2.4226	0.328869	0.004933	0.057816	2	0.066667	0.687154
383	B.1838286	Lacunisphaera limnophila	BACTERIA_V3V4	11	2.47909	0.338179	0.006933	0.057362	12	0.036364	0.703284
31	F.169388	Fusarium solani	FUNGI	12	3.57671	0.331832	0.007937	0.057196	2	0.090909	0.712167
413	B.1400387	Bythopirellula goksoeyrii	BACTERIA_V3V4	12	3.77917	0.324285	0.00628	0.057173	6	0.166667	0.713851
11	F.2675880	Fusarium flagelliforme	FUNGI	10	2.8892	0.325239	0.004645	0.057088	4	0.155556	0.681925
292	B.673862	Candidatus Babela massiliensis	BACTERIA_V3V4	11	2.7809	0.325239	0.006315	0.056646	7	0.145455	0.690385
35	F.46681	Entamoeba dispar	FUNGI	11	4.4203	0.32838	0.006046	0.056602	9	0.072727	0.68579
337	B.2736	Verrucomicrobium spinosum	BACTERIA_V3V4	11	3.5703	0.322628	0.005336	0.056597	9	0.145455	0.691684
376	B.2518177	Flavobacterium sangjuense	BACTERIA_V3V4	10	2.87222	0.329114	0.004745	0.055989	9	0.133333	0.670233
382	B.2710758	Phototrophicus methaneseepsis	BACTERIA_V3V4	11	2.83658	0.331583	0.006867	0.055978	13	0.109091	0.685631
144	B.2527974	Tautonia plasticadhaerens	BACTERIA_V3V4	11	2.88242	0.326681	0.006079	0.055922	2	0.181818	0.689218
255	B.2975482	Paenibacillus sp. SS4	BACTERIA_V3V4	11	3.85471	0.325959	0.006334	0.055612	12	0.109091	0.671337
143	B.2712222	Nordella sp. HKS 07	BACTERIA_V3V4	12	2.91741	0.324047	0.006811	0.05558	12	0.090909	0.68298
399	B.40324	Stenotrophomonas maltophilia	BACTERIA_V3V4	10	3.01157	0.328869	0.004979	0.055416	6	0.133333	0.674826
328	B.1632864	Planctomyces sp. SH-PL14	BACTERIA_V3V4	12	2.75208	0.325479	0.007784	0.055395	8	0.060606	0.690575
149	B.2527989	Alienimonas californiensis	BACTERIA_V3V4	11	3.67108	0.323572	0.006052	0.055258	10	0.145455	0.680353
34	F.45607	Wickerhamiella sorbophila	FUNGI	10	2.85495	0.328625	0.005214	0.054987	11	0.088889	0.66111
410	B.1936990	Nitrospira sp. KM1	BACTERIA_V3V4	10	3.29065	0.328869	0.005307	0.054975	8	0.066667	0.658624
304	B.2980107	Lacinutrix sp. HL-RS19	BACTERIA_V3V4	11	2.62894	0.320058	0.006341	0.054959	4	0.090909	0.679525
233	B.2213200	Nocardia mangyaensis	BACTERIA_V3V4	11	2.39418	0.318444	0.005944	0.054948	0	0.163636	0.682142
368	B.191495	Conexibacter woesei	BACTERIA_V3V4	10	2.58061	0.327407	0.005644	0.054812	12	0.088889	0.649016
406	B.708113	Terrihabitans soli	BACTERIA_V3V4	10	2.62152	0.321689	0.004473	0.054617	2	0.111111	0.658816
288	B.497727	Candidatus Nitrososphaera gargensis	BACTERIA_V3V4	10	3.06396	0.323572	0.005072	0.054611	4	0.066667	0.654222
118	B.2576891	Nibricoccus aquaticus	BACTERIA_V3V4	10	3.54869	0.319595	0.004287	0.054539	6	0.177778	0.663075
223	B.1351	Enterococcus faecalis	BACTERIA_V3V4	10	2.81246	0.334848	0.006409	0.054494	0	0.044444	0.659008
412	B.417367	Paenisporosarcina antarctica	BACTERIA_V3V4	10	2.69176	0.32765	0.005067	0.054391	9	0.155556	0.654331
398	B.1813871	Panacibacter ginsenosidivorans	BACTERIA_V3V4	11	4.6186	0.331583	0.006124	0.054332	10	0.127273	0.657881
420	B.1670830	Egicoccus halophilus	BACTERIA_V3V4	8	3.50533	0.321923	0.003282	0.054067	2	0.142857	0.632967
6	F.41047	Aspergillus thermomutatus	FUNGI	10	3.09863	0.331583	0.006315	0.05404	0	0.088889	0.663152
372	B.666686	Bacillus sp. 1NLA3E	BACTERIA_V3V4	10	2.948	0.321689	0.005324	0.054005	9	0.088889	0.658755
345	B.187145	Caldithrix abyssi	BACTERIA_V3V4	10	3.33322	0.323099	0.005236	0.053997	8	0.133333	0.652091
89	B.1486991	Candidatus Sodalis pierantonius	BACTERIA_V3V4	10	3.93375	0.317073	0.004378	0.053877	0	0.177778	0.646053
280	B.563172	Ferruginibacter lapsinanis	BACTERIA_V3V4	11	3.39248	0.332081	0.007543	0.053812	9	0.090909	0.66696
44	F.152316	Truncatella angustata	FUNGI	10	2.54494	0.32644	0.005453	0.053773	6	0.111111	0.649143
174	B.29546	Lawsonia intracellularis	BACTERIA_V3V4	9	2.47231	0.327407	0.004172	0.053763	13	0.083333	0.635313
361	B.2321403	Chryseolinea soli	BACTERIA_V3V4	10	2.39858	0.334848	0.006159	0.053626	0	0.088889	0.654917
36	F.655981	Pseudogymnoascus destructans	FUNGI	11	3.49344	0.324761	0.005685	0.053581	9	0.109091	0.662066
77	B.1798224	Jiangella sp. DSM 45060	BACTERIA_V3V4	11	2.5165	0.328137	0.006046	0.05346	13	0.090909	0.653711
193	B.467976	Iamia majanohamensis	BACTERIA_V3V4	11	3.66906	0.334595	0.00753	0.053374	13	0.018182	0.656793
209	B.283811	Stackebrandtia nassauensis	BACTERIA_V3V4	11	3.38839	0.332331	0.007845	0.053087	2	0.036364	0.655029
147	B.2527982	Mucisphaera calidilacus	BACTERIA_V3V4	11	2.91775	0.319364	0.006235	0.05307	1	0.181818	0.666486
126	B.2781735	Saccharothrix sp. 6-C	BACTERIA_V3V4	11	3.21787	0.325	0.006311	0.052977	12	0.109091	0.655665
219	B.42253	Nitrospira moscoviensis	BACTERIA_V3V4	12	2.85276	0.327165	0.008172	0.052972	5	0.045455	0.659283
366	B.1870819	Paenibacillus sp. BIHB4019	BACTERIA_V3V4	11	2.96888	0.325479	0.00621	0.052951	4	0.054545	0.65787
208	B.2024580	Plantactinospora sp. KBS50	BACTERIA_V3V4	11	2.33978	0.326199	0.007672	0.052922	1	0.109091	0.652416
400	B.28049	Acidothermus cellulolyticus	BACTERIA_V3V4	10	2.87932	0.320755	0.004565	0.052763	12	0.111111	0.652365
148	B.2527983	Caulifigura coniformis	BACTERIA_V3V4	10	3.20451	0.332081	0.005611	0.052752	9	0.088889	0.636106
163	B.2528021	Anatilimnocola aggregata	BACTERIA_V3V4	10	2.44111	0.325718	0.005327	0.052668	10	0.111111	0.645472
146	B.152260	Chloroflexus aggregans	BACTERIA_V3V4	11	2.7178	0.321689	0.006491	0.05255	13	0.127273	0.668011
101	B.287	Pseudomonas aeruginosa	BACTERIA_V3V4	10	3.10529	0.332081	0.006151	0.052547	13	0.088889	0.642064
113	B.2916755	Emticicia sp. 21SJ11W-3	BACTERIA_V3V4	11	2.96311	0.332331	0.007697	0.052527	6	0.054545	0.657741
4	F.393283	Pestalotiopsis fici	FUNGI	11	3.37126	0.330591	0.007378	0.052512	5	0.072727	0.652742
176	B.2986919	Paeniglutamicibacter sp. ZC-3	BACTERIA_V3V4	10	3.59529	0.331583	0.005572	0.052298	10	0.044444	0.629911
397	B.314722	Pseudoxanthomonas suwonensis	BACTERIA_V3V4	10	2.87113	0.325239	0.005584	0.052171	0	0.111111	0.631491
323	B.84531	Lysobacter antibioticus	BACTERIA_V3V4	10	2.13052	0.325	0.005039	0.052149	3	0.088889	0.642944
7	F.5210	Filobasidium floriforme	FUNGI	11	2.81746	0.320522	0.007284	0.051835	8	0.090909	0.653154
115	B.451	Tatlockia micdadei	BACTERIA_V3V4	10	3.63546	0.322157	0.005404	0.051718	2	0.066667	0.620503
187	B.2937801	Conexibacter sp. DBS9H8	BACTERIA_V3V4	10	2.7544	0.322628	0.005295	0.051685	12	0.111111	0.624238
315	B.2976241	Tahibacter sp. W38	BACTERIA_V3V4	10	4.00038	0.319134	0.005161	0.051652	13	0.111111	0.626515
289	B.84032	Pseudoclostridium thermosuccinogenes	BACTERIA_V3V4	10	2.93788	0.325	0.00595	0.051558	3	0.133333	0.633786
326	B.1882749	Opitutus sp. GAS368	BACTERIA_V3V4	9	2.21759	0.316392	0.003247	0.051502	4	0.166667	0.618206
135	B.2806348	Devosia sp. SL43	BACTERIA_V3V4	11	2.73513	0.316619	0.005053	0.051459	3	0.181818	0.650252
195	B.349221	Micavibrio aeruginosavorus	BACTERIA_V3V4	9	2.85599	0.322157	0.003701	0.051443	13	0.083333	0.612614
350	B.2571030	Pontibacter sp. SGAir0037	BACTERIA_V3V4	10	3.78608	0.331583	0.006495	0.051427	12	0.022222	0.63217
167	B.2745197	Adhaeribacter radiodurans	BACTERIA_V3V4	11	3.89079	0.325479	0.006266	0.051415	1	0.109091	0.644731
441	B.372663	Isoptericola dokdonensis	BACTERIA_V3V4	11	2.30199	0.324285	0.005691	0.051375	3	0.145455	0.638616
128	B.2875962	Candidatus Sulfidibacterium hydrothermale	BACTERIA_V3V4	11	3.80492	0.324523	0.00652	0.051334	3	0.090909	0.640883
98	B.28901	Salmonella enterica	BACTERIA_V3V4	10	3.29602	0.333333	0.006419	0.051329	13	0.066667	0.63099
142	B.2712223	Nocardioides anomalus	BACTERIA_V3V4	11	2.92232	0.329359	0.006917	0.051295	13	0.072727	0.638136
424	B.2567896	Polyangium aurulentum	BACTERIA_V3V4	10	3.04269	0.322863	0.004909	0.051266	3	0.066667	0.623978
196	B.1930276	Adhaeretor mobilis	BACTERIA_V3V4	9	2.99099	0.317073	0.003471	0.051244	4	0.194444	0.611077
346	B.199441	Halalkalibacter krulwichiae	BACTERIA_V3V4	11	4.01738	0.331086	0.007025	0.051171	3	0.072727	0.638058
234	B.2917725	Georgenia sp. TF02-10	BACTERIA_V3V4	10	2.65333	0.322392	0.005868	0.051088	7	0.088889	0.618467
354	B.674703	Rhodoplanes sp. Z2-YC6860	BACTERIA_V3V4	10	3.11561	0.32838	0.004761	0.051069	9	0.133333	0.625756
411	B.1891926	Fuerstiella marisgermanici	BACTERIA_V3V4	10	3.8654	0.320522	0.004723	0.050961	10	0.088889	0.624073
18	F.5334	Schizophyllum commune	FUNGI	10	2.56746	0.32765	0.005246	0.050942	10	0.111111	0.625116
53	F.231269	Fusarium coffeatum	FUNGI	9	2.90866	0.320522	0.003657	0.050908	9	0.138889	0.61084
320	B.293387	Bacillus altitudinis	BACTERIA_V3V4	11	2.54975	0.327407	0.007369	0.050807	3	0.072727	0.632725
236	B.1402	Bacillus licheniformis	BACTERIA_V3V4	10	2.88541	0.323099	0.005037	0.05075	5	0.133333	0.622168
171	B.2728827	Catellatospora sp. IY07-71	BACTERIA_V3V4	11	2.74799	0.321221	0.006365	0.050739	10	0.090909	0.630718
321	B.3009083	Aurantiacibacter sp. MUD61	BACTERIA_V3V4	10	2.52965	0.328137	0.006322	0.05068	1	0.044444	0.612287
246	B.83552	Parachlamydia acanthamoebae	BACTERIA_V3V4	11	3.037	0.327893	0.00743	0.050501	2	0.109091	0.641895
291	B.370764	Microbacterium pygmaeum	BACTERIA_V3V4	10	2.91617	0.332581	0.005927	0.050494	8	0.066667	0.621331
5	F.45130	Bipolaris sorokiniana	FUNGI	11	2.46621	0.321689	0.006191	0.05045	2	0.090909	0.63285
428	B.2694929	Pontibacter russatus	BACTERIA_V3V4	11	4.03327	0.319364	0.005663	0.050413	13	0.072727	0.621873
294	B.3029084	Aminithiophilus ramosus	BACTERIA_V3V4	9	2.12769	0.311049	0.003264	0.050305	0	0.194444	0.598381
245	B.2086471	Adhaeribacter swui	BACTERIA_V3V4	10	2.30737	0.323572	0.004794	0.050287	11	0.044444	0.613683
199	B.2712698	Salaquimonas pukyongi	BACTERIA_V3V4	10	3.03223	0.319364	0.004951	0.050003	3	0.133333	0.624919
364	B.2722752	Iamia sp. SCSIO 61187	BACTERIA_V3V4	10	2.82558	0.324047	0.004842	0.049962	12	0.066667	0.616292
99	B.33008	Rhodococcus globerulus	BACTERIA_V3V4	9	4.24648	0.330097	0.004987	0.049928	10	0.055556	0.600127
48	F.588596	Rhizophagus irregularis	FUNGI	10	2.62652	0.333082	0.006155	0.049835	12	0.066667	0.612604
306	B.2350	Haliscomenobacter hydrossis	BACTERIA_V3V4	10	3.20523	0.321689	0.004248	0.049631	10	0.133333	0.604089
266	B.1759059	Candidatus Viadribacter manganicus	BACTERIA_V3V4	10	3.50155	0.322392	0.004886	0.049589	3	0.133333	0.609152
32	F.92629	Metarhizium album	FUNGI	10	4.35663	0.321923	0.00504	0.049528	3	0.133333	0.609733
230	B.1390	Bacillus amyloliquefaciens	BACTERIA_V3V4	10	2.56839	0.326199	0.005512	0.049526	13	0.066667	0.615511
214	B.2942204	Sporosarcina sp. Marseille-Q4943	BACTERIA_V3V4	10	3.575	0.318903	0.004429	0.049525	9	0.111111	0.607666
73	B.2969620	Bosea sp. NBC_00436	BACTERIA_V3V4	11	2.50041	0.320988	0.006677	0.049484	7	0.072727	0.636129
81	B.2728021	Duganella dendranthematis	BACTERIA_V3V4	10	2.35601	0.318903	0.005594	0.049335	13	0.044444	0.608521
19	F.5341	Agaricus bisporus	FUNGI	9	3.08168	0.329114	0.004943	0.049292	10	0.111111	0.593039
225	B.234827	Candidatus Midichloria mitochondrii	BACTERIA_V3V4	9	3.5335	0.322392	0.004584	0.049292	11	0.055556	0.593507
324	B.1337936	Calothrix sp. 336/3	BACTERIA_V3V4	10	2.88025	0.323336	0.004856	0.049254	6	0.177778	0.612219
358	B.80816	Haliangium ochraceum	BACTERIA_V3V4	10	2.77099	0.321455	0.0053	0.048887	3	0.088889	0.606514
290	B.2857059	Mycobacterium sp. SMC-4	BACTERIA_V3V4	9	2.2585	0.318444	0.003736	0.048866	9	0.111111	0.587741
122	B.131568	Kineococcus radiotolerans	BACTERIA_V3V4	8	2.31889	0.319364	0.003285	0.048844	1	0.107143	0.578321
261	B.1792	Mycolicibacterium chitae	BACTERIA_V3V4	11	3.77297	0.315489	0.005876	0.048794	13	0.163636	0.622964
390	B.2714935	Leucobacter viscericola	BACTERIA_V3V4	10	2.822	0.32765	0.00526	0.048709	2	0.088889	0.605045
145	B.2527972	Aeoliella mucimassa	BACTERIA_V3V4	10	2.62763	0.322157	0.005359	0.048542	12	0.111111	0.60399
404	B.2735562	Candidatus Absconditicoccus praedator	BACTERIA_V3V4	10	3.053	0.320058	0.005146	0.048505	13	0.155556	0.592522
39	F.1463999	Botrytis sinoallii	FUNGI	10	2.6048	0.318444	0.004869	0.048484	9	0.155556	0.601225
16	F.29898	Rhodotorula graminis	FUNGI	8	2.6711	0.307799	0.001874	0.048447	0	0.321429	0.567647
282	B.1402861	Priestia filamentosa	BACTERIA_V3V4	11	4.06253	0.324285	0.007242	0.048381	1	0.109091	0.611723
152	B.2527994	Thalassoglobus polymorphus	BACTERIA_V3V4	11	3.75969	0.32644	0.005644	0.048352	6	0.145455	0.612917
132	B.135740	Paracoccus kondratievae	BACTERIA_V3V4	10	2.86855	0.32838	0.005485	0.048068	8	0.066667	0.596028
12	F.119953	Alternaria atra	FUNGI	10	3.10305	0.323099	0.005111	0.048051	12	0.088889	0.587298
130	B.562	Escherichia coli	BACTERIA_V3V4	11	3.38094	0.317073	0.00548	0.048021	6	0.109091	0.604599
46	F.1396493	Fimicolochytrium jonesii	FUNGI	10	3.53067	0.323336	0.00544	0.048002	1	0.044444	0.593952
273	B.2811781	Gemmobacter fulva	BACTERIA_V3V4	9	2.33277	0.317073	0.00439	0.047957	10	0.111111	0.593011
395	B.363852	Pedobacter ginsengisoli	BACTERIA_V3V4	10	3.48219	0.320755	0.004467	0.047908	7	0.155556	0.601554
158	B.2527964	Gimesia aquarii	BACTERIA_V3V4	9	2.3502	0.311049	0.003324	0.047799	10	0.194444	0.584752
285	B.2057	Sphaerobacter thermophilus	BACTERIA_V3V4	7	2.10992	0.309958	0.001703	0.047653	0	0.238095	0.549774
235	B.1396	Bacillus cereus	BACTERIA_V3V4	10	3.58346	0.322628	0.005465	0.047536	1	0.066667	0.589333
10	F.861299	Gemmatirosa kalamazoonensis	FUNGI	9	2.28452	0.319826	0.004155	0.047487	12	0.111111	0.580338
322	B.1862145	Nisaea acidiphila	BACTERIA_V3V4	9	2.96873	0.313475	0.003176	0.047407	12	0.166667	0.573903
202	B.1307763	Kiritimatiella glycovorans	BACTERIA_V3V4	9	2.77795	0.320522	0.004003	0.047326	9	0.083333	0.57321
286	B.2066483	Candidatus Chromulinivorax destructor	BACTERIA_V3V4	11	2.85095	0.319595	0.007528	0.046889	2	0.127273	0.607112
360	B.1379270	Gemmatimonas phototrophica	BACTERIA_V3V4	10	3.29439	0.323336	0.005235	0.046879	12	0.133333	0.590824
365	B.2558931	Rhodocaloribacter litoris	BACTERIA_V3V4	11	4.82272	0.316619	0.006683	0.046792	1	0.090909	0.598657
42	F.27337	Verticillium dahliae	FUNGI	9	3.40927	0.321455	0.004086	0.046694	8	0.166667	0.570118
308	B.133453	Caldilinea aerophila	BACTERIA_V3V4	10	2.90951	0.325959	0.006107	0.046641	4	0.111111	0.584093
156	B.1123043	Telmatocola sphagniphila	BACTERIA_V3V4	11	2.68096	0.320522	0.006747	0.046605	9	0.054545	0.588125
71	B.1286180	Mycolicibacterium sediminis	BACTERIA_V3V4	11	2.7635	0.322157	0.005867	0.046597	13	0.072727	0.584705
378	B.31909	Halothermothrix orenii	BACTERIA_V3V4	9	2.83095	0.322157	0.004521	0.046547	6	0.166667	0.567326
124	B.188932	Pedobacter cryoconitis	BACTERIA_V3V4	9	2.94646	0.321221	0.004158	0.046457	6	0.111111	0.564846
385	B.466153	Singulisphaera acidiphila	BACTERIA_V3V4	9	2.57	0.327165	0.005579	0.046119	13	0.111111	0.573053
26	F.5507	Fusarium oxysporum	FUNGI	9	3.5147	0.311049	0.00359	0.046077	0	0.111111	0.553735
216	B.2594003	Ferrovibrio terrae	BACTERIA_V3V4	8	2.5956	0.315039	0.002824	0.046073	0	0.178571	0.551537
66	B.2760713	Lacibacter sp. S13-6-22	BACTERIA_V3V4	8	2.57446	0.316619	0.003278	0.046033	13	0.214286	0.559362
75	B.69	Lysobacter enzymogenes	BACTERIA_V3V4	9	2.04207	0.319595	0.00388	0.045987	2	0.111111	0.56744
136	B.2499145	Rhodococcus sp. X156	BACTERIA_V3V4	10	2.38218	0.311268	0.004628	0.045964	4	0.133333	0.572589
247	B.83561	Simkania negevensis	BACTERIA_V3V4	10	4.27858	0.328625	0.006483	0.045927	6	0.044444	0.566711
278	B.2021	Thermobifida fusca	BACTERIA_V3V4	9	2.87164	0.315039	0.004116	0.045922	5	0.111111	0.557639
262	B.1824	Nocardia asteroides	BACTERIA_V3V4	10	2.83989	0.321455	0.006132	0.045904	7	0.088889	0.59701
110	B.1855912	Luteitalea pratensis	BACTERIA_V3V4	9	2.47315	0.316392	0.004377	0.045834	0	0.083333	0.547251
427	B.2567941	Metabacillus sediminilitoris	BACTERIA_V3V4	10	3.0495	0.320988	0.005505	0.045763	7	0.111111	0.584748
391	B.1891644	Epidermidibacterium keratini	BACTERIA_V3V4	9	3.04429	0.326681	0.005155	0.045674	6	0.083333	0.566388
248	B.1033854	Thioalkalivibrio sulfidiphilus	BACTERIA_V3V4	8	2.54289	0.318673	0.003507	0.045557	1	0.142857	0.551494
85	B.467094	Ilumatobacter coccineus	BACTERIA_V3V4	9	2.43335	0.315489	0.00437	0.04549	0	0.111111	0.550274
227	B.927083	Sandaracinus amylolyticus	BACTERIA_V3V4	9	2.47697	0.32381	0.004552	0.045485	3	0.111111	0.563586
170	B.2970464	Massilia sp. H6	BACTERIA_V3V4	10	2.59154	0.313253	0.005404	0.045476	5	0.133333	0.575653
296	B.2562284	Pseudolabrys sp. FHR47	BACTERIA_V3V4	10	3.31651	0.323099	0.005733	0.045436	7	0.133333	0.570625
58	F.76775	Malassezia restricta	FUNGI	9	2.48021	0.314144	0.003278	0.045409	13	0.222222	0.555008
329	B.1632865	Pirellula sp. SH-Sr6A	BACTERIA_V3V4	11	4.23212	0.320522	0.006858	0.045371	11	0.109091	0.581879
207	B.1987723	Cellvibrio sp. PSBB006	BACTERIA_V3V4	9	2.24299	0.314367	0.003583	0.045365	7	0.138889	0.558389
373	B.248903	Paenibacillus xylanilyticus	BACTERIA_V3V4	10	2.61271	0.316392	0.004932	0.045328	7	0.133333	0.563444
51	F.37727	Talaromyces marneffei	FUNGI	9	2.62906	0.323572	0.005052	0.045225	4	0.111111	0.554802
408	B.1842727	Rhodoferax koreense	BACTERIA_V3V4	10	2.4974	0.324523	0.006468	0.045187	7	0.044444	0.568927
422	B.913107	Pelolinea submarina	BACTERIA_V3V4	9	3.03104	0.324761	0.005228	0.045118	5	0.055556	0.554442
59	B.2654249	Mesorhizobium sp. NBSH29	BACTERIA_V3V4	8	2.86504	0.322157	0.003928	0.044911	12	0.071429	0.539234
55	F.1316788	Lachnellula hyalina	FUNGI	10	2.13074	0.318444	0.005782	0.044899	2	0.044444	0.576442
423	B.204525	Roseomonas cervicalis	BACTERIA_V3V4	9	2.46994	0.325	0.004824	0.044757	6	0.111111	0.560348
401	B.56730	Rhizobium gallicum	BACTERIA_V3V4	9	2.98108	0.317073	0.004225	0.044755	13	0.055556	0.544112
386	B.1535204	Metabacillus endolithicus	BACTERIA_V3V4	10	2.36139	0.325479	0.005965	0.04474	3	0.044444	0.563776
70	B.52	Chondromyces crocatus	BACTERIA_V3V4	10	2.84097	0.318673	0.006163	0.044618	10	0.066667	0.560174
112	B.446	Legionella pneumophila	BACTERIA_V3V4	10	2.41251	0.326681	0.007014	0.044555	3	0.044444	0.567275
108	B.53635	Acidimicrobium ferrooxidans	BACTERIA_V3V4	10	3.88559	0.315489	0.004682	0.044312	5	0.155556	0.559738
105	B.353	Azotobacter chroococcum	BACTERIA_V3V4	9	2.83907	0.329605	0.005168	0.044301	4	0.055556	0.549684
375	B.191579	Fluviicola taffensis	BACTERIA_V3V4	9	2.57295	0.325239	0.004497	0.044173	4	0.083333	0.545522
363	B.2911172	Solitalea lacus	BACTERIA_V3V4	10	2.34374	0.310175	0.004241	0.044135	10	0.2	0.566086
181	B.1332188	Candidatus Saccharimonas aalborgensis	BACTERIA_V3V4	10	2.64187	0.318444	0.0056	0.044133	11	0.088889	0.564621
194	B.1176587	Niabella ginsenosidivorans	BACTERIA_V3V4	10	2.38569	0.313475	0.00521	0.043981	2	0.133333	0.56509
259	B.2807512	Humisphaera borealis	BACTERIA_V3V4	10	2.47173	0.307158	0.003583	0.043933	12	0.2	0.56218
198	B.33871	Coriobacterium glomerans	BACTERIA_V3V4	9	3.12081	0.32029	0.004352	0.043879	12	0.083333	0.544801
352	B.465721	Steroidobacter denitrificans	BACTERIA_V3V4	9	2.27714	0.322628	0.004188	0.043841	1	0.111111	0.550368
325	B.2951806	Lentzea sp. HUAS12	BACTERIA_V3V4	10	2.61009	0.322392	0.005509	0.043728	0	0.088889	0.557967
275	B.38875	Heyndrickxia oleronia	BACTERIA_V3V4	9	2.82095	0.304828	0.002751	0.043653	13	0.166667	0.530536
339	B.2591463	Brevundimonas sp. M20	BACTERIA_V3V4	10	3.44528	0.319364	0.005512	0.043504	6	0.155556	0.552307
160	B.2528022	Botrimarina mediterranea	BACTERIA_V3V4	9	3.37641	0.317757	0.003902	0.043472	13	0.083333	0.537604
125	B.2585135	Georgenia wutianyii	BACTERIA_V3V4	8	2.43805	0.32029	0.003799	0.043461	0	0.071429	0.524857
297	B.432329	Deinococcus peraridilitoris	BACTERIA_V3V4	9	2.75119	0.320058	0.005315	0.043461	1	0.027778	0.533719
119	B.324057	Paenibacillus sp. JDR-2	BACTERIA_V3V4	10	2.296	0.311927	0.004525	0.043404	1	0.2	0.559985
86	B.946333	Rhizobacter gummiphilus	BACTERIA_V3V4	10	2.64144	0.314144	0.004713	0.043207	6	0.133333	0.563001
154	B.2527995	Symmachiella dynata	BACTERIA_V3V4	8	2.30793	0.316392	0.003372	0.043176	6	0.071429	0.516385
82	B.2715735	Candidatus Chazhemtobacterium aquaticus	BACTERIA_V3V4	11	3.31284	0.319134	0.007026	0.043156	8	0.090909	0.573449
341	B.1882831	Verrucomicrobium sp. GAS474	BACTERIA_V3V4	11	2.37236	0.319364	0.006669	0.043032	13	0.090909	0.552996
129	B.2736649	Mycolicibacterium mengxianglii	BACTERIA_V3V4	10	2.51067	0.324047	0.005756	0.042935	10	0.111111	0.551564
3	F.293939	Aspergillus lentulus	FUNGI	9	3.38837	0.315264	0.003891	0.042857	9	0.111111	0.52747
218	B.1471761	Novibacillus thermophilus	BACTERIA_V3V4	10	2.51301	0.314144	0.005086	0.042823	1	0.111111	0.547135
416	B.2838157	Flavihumibacter fluminis (ex Park et al. 2022)	BACTERIA_V3V4	8	3.20243	0.313475	0.002951	0.042815	4	0.071429	0.521776
334	B.1235591	Pseudorhodoplanes sinuspersici	BACTERIA_V3V4	8	2.79497	0.312367	0.002693	0.042607	2	0.142857	0.520823
120	B.2806210	Flagellatimonas centrodinii	BACTERIA_V3V4	8	3.35176	0.313253	0.003083	0.042486	1	0.142857	0.513513
88	B.53399	Hyphomicrobium denitrificans	BACTERIA_V3V4	9	2.61438	0.318673	0.005004	0.042482	5	0.055556	0.525856
217	B.95486	Burkholderia stabilis	BACTERIA_V3V4	9	2.62324	0.308014	0.00342	0.042472	0	0.166667	0.526117
256	B.1193713	Neobacillus mesonae	BACTERIA_V3V4	10	2.56341	0.318215	0.005323	0.04228	3	0.088889	0.542518
155	B.2843330	Elioraea tepida	BACTERIA_V3V4	9	3.41348	0.311487	0.003512	0.042248	12	0.138889	0.52897
335	B.1936003	Anaerohalosphaera lusitana	BACTERIA_V3V4	9	3.41068	0.322157	0.005743	0.042235	10	0.083333	0.524748
342	B.2665156	Candidatus Mycosynbacter amalyticus	BACTERIA_V3V4	9	2.20234	0.307158	0.003959	0.04223	4	0.083333	0.518844
369	B.1473598	Paludibaculum fermentans	BACTERIA_V3V4	7	2.30585	0.31083	0.002271	0.042167	10	0.142857	0.493448
22	F.5480	Candida parapsilosis	FUNGI	9	2.46437	0.32381	0.005064	0.042133	11	0.055556	0.529472
409	B.28223	Desulfobacula toluolica	BACTERIA_V3V4	9	2.25874	0.317529	0.004649	0.041989	5	0.138889	0.526559
64	B.2662448	Legionella sp. MW5194	BACTERIA_V3V4	9	2.80937	0.314367	0.003851	0.041884	12	0.138889	0.522004
300	B.1620215	Sulfuricaulis limicola	BACTERIA_V3V4	9	2.56029	0.315039	0.003668	0.041865	6	0.138889	0.521056
206	B.861299	Gemmatirosa kalamazoonensis	BACTERIA_V3V4	8	2.65007	0.315489	0.003803	0.041821	0	0.071429	0.505534
263	B.2918171	Anaeromyxobacter paludicola	BACTERIA_V3V4	9	3.3646	0.323099	0.005146	0.041765	10	0.111111	0.524284
190	B.2896848	Yinghuangia sp. ASG 101	BACTERIA_V3V4	11	4.12495	0.309307	0.004596	0.041747	7	0.163636	0.55653
402	B.2698679	Sphingomonas changnyeongensis	BACTERIA_V3V4	9	3.2545	0.309307	0.003225	0.041726	12	0.138889	0.524903
8	F.41068	Aspergillus campestris	FUNGI	9	3.1649	0.321923	0.004799	0.041562	6	0.055556	0.513396
76	B.860235	Kibdelosporangium phytohabitans	BACTERIA_V3V4	10	3.75299	0.306306	0.004104	0.041555	8	0.155556	0.535675
123	B.2109914	Ottowia oryzae	BACTERIA_V3V4	9	2.57739	0.324285	0.00476	0.041462	1	0	0.511272
191	B.2995155	Asticcacaulis sp. SL142	BACTERIA_V3V4	7	3.14926	0.320058	0.002726	0.041443	9	0.142857	0.498101
394	B.2518371	Nocardioides seonyuensis	BACTERIA_V3V4	9	2.24628	0.313253	0.004505	0.041431	4	0.111111	0.524985
168	B.29510	Turneriella parva	BACTERIA_V3V4	7	2.69201	0.317757	0.002387	0.041346	13	0.190476	0.497035
166	B.2528024	Lacipirellula limnantheis	BACTERIA_V3V4	9	3.99117	0.311487	0.00341	0.041262	12	0.083333	0.514087
93	B.1806508	Candidatus Promineofilum breve	BACTERIA_V3V4	9	3.08974	0.322863	0.0054	0.041259	6	0.055556	0.527736
87	B.299152	Micromonospora siamensis	BACTERIA_V3V4	8	2.81256	0.323099	0.00428	0.04122	1	0.071429	0.511594
269	B.153496	Kozakia baliensis	BACTERIA_V3V4	10	2.57772	0.320058	0.005894	0.04119	11	0.111111	0.546067
388	B.228602	Nocardia arthritidis	BACTERIA_V3V4	8	2.1314	0.315039	0.003632	0.041055	6	0.071429	0.508208
357	B.1608628	Candidatus Filomicrobium marinum	BACTERIA_V3V4	8	3.03908	0.316846	0.003583	0.041035	12	0.107143	0.505862
251	B.2283195	Sporosarcina sp. PTS2304	BACTERIA_V3V4	10	2.80979	0.305038	0.003979	0.040734	4	0.133333	0.527193
314	B.1915309	Silvanigrella aquatica	BACTERIA_V3V4	9	3.39557	0.311707	0.00343	0.040696	5	0.111111	0.500662
356	B.2984843	Methylobacterium sp. FF17	BACTERIA_V3V4	9	2.38691	0.31594	0.003929	0.040654	5	0.138889	0.505668
47	F.73501	Cordyceps militaris	FUNGI	9	3.36675	0.321923	0.004688	0.040632	4	0.111111	0.515658
186	B.2937800	Conexibacter sp. S30A1	BACTERIA_V3V4	9	2.91746	0.315264	0.004798	0.040573	4	0.111111	0.508836
150	B.545501	Oceanobacillus oncorhynchi	BACTERIA_V3V4	9	2.43201	0.317986	0.004958	0.040567	6	0.083333	0.51084
281	B.71667	Waddlia chondrophila	BACTERIA_V3V4	9	3.0365	0.316619	0.003957	0.040494	2	0.194444	0.523794
331	B.658062	Candidatus Koribacter versatilis	BACTERIA_V3V4	9	2.36691	0.313253	0.004189	0.040286	9	0.083333	0.495113
29	F.33178	Aspergillus terreus	FUNGI	9	2.21045	0.310175	0.004556	0.040245	7	0.083333	0.498879
387	B.2219224	Nonomuraea phyllanthi	BACTERIA_V3V4	9	2.6659	0.316846	0.004064	0.040212	1	0.083333	0.493417
305	B.2763008	Nocardioides sp. zg-1228	BACTERIA_V3V4	10	3.3379	0.321923	0.006529	0.040186	6	0.066667	0.515684
237	B.1423	Bacillus subtilis	BACTERIA_V3V4	9	2.55008	0.30546	0.003942	0.04017	0	0.111111	0.508942
442	B.1736675	Devosia sp. A16	BACTERIA_V3V4	8	2.23378	0.315489	0.002878	0.040138	10	0.142857	0.492286
338	B.2812560	Conexibacter sp. SYSU D00693	BACTERIA_V3V4	8	2.57648	0.317986	0.004135	0.040094	10	0.107143	0.496981
374	B.1903704	Tumebacillus avium	BACTERIA_V3V4	9	2.53438	0.315039	0.004317	0.040059	13	0.083333	0.504408
134	B.2843215	Miltoncostaea marina	BACTERIA_V3V4	10	3.35967	0.314815	0.005902	0.040034	12	0.111111	0.510837
301	B.2943192	Blastopirellula sp. J2-11	BACTERIA_V3V4	8	2.80904	0.312147	0.003132	0.039839	12	0.107143	0.493053
138	B.2843216	Miltoncostaea oceani	BACTERIA_V3V4	10	2.1223	0.314144	0.005416	0.039825	8	0.111111	0.527141
37	F.1220207	Aspergillus puulaauensis	FUNGI	9	2.86609	0.309958	0.004008	0.039804	4	0.111111	0.509353
57	F.76773	Malassezia globosa	FUNGI	8	2.32796	0.310611	0.003137	0.039789	0	0.107143	0.48895
429	B.2694930	Pontibacter pudoricolor	BACTERIA_V3V4	9	3.34224	0.312367	0.004134	0.039724	5	0.138889	0.48905
224	B.1352	Enterococcus faecium	BACTERIA_V3V4	8	2.58498	0.309958	0.003029	0.039549	13	0.107143	0.489231
430	B.2862869	Horticoccus luteus	BACTERIA_V3V4	8	2.52204	0.317986	0.004268	0.039372	2	0.035714	0.486802
169	B.2745198	Metabacillus sp. KUDC1714	BACTERIA_V3V4	8	2.76122	0.309958	0.003265	0.039366	1	0.142857	0.494632
40	F.1070780	Aspergillus affinis	FUNGI	9	2.49733	0.316846	0.005721	0.039183	8	0.083333	0.518714
249	B.2315862	Paraflavitalea soli	BACTERIA_V3V4	9	2.5058	0.307799	0.004002	0.039163	6	0.111111	0.503424
215	B.111831	Defluviicoccus vanus	BACTERIA_V3V4	9	2.40874	0.306731	0.003806	0.039148	1	0.111111	0.499076
277	B.51173	Ureibacillus thermosphaericus	BACTERIA_V3V4	8	2.71398	0.309741	0.0025	0.039092	3	0.178571	0.483993
351	B.1526572	Aquisalinus flavus	BACTERIA_V3V4	10	2.63993	0.311268	0.004644	0.039081	2	0.133333	0.520487
252	B.2086577	Lysinibacillus timonensis	BACTERIA_V3V4	8	2.39359	0.310611	0.002956	0.039038	6	0.178571	0.491462
96	B.2719989	Entomospira culicis	BACTERIA_V3V4	8	2.37797	0.312147	0.003128	0.039005	2	0.142857	0.494285
241	B.79329	Chitinophaga pinensis	BACTERIA_V3V4	9	2.59521	0.315264	0.004192	0.038985	6	0.194444	0.511073
311	B.2029983	Chitinophaga caeni	BACTERIA_V3V4	8	2.5687	0.309741	0.003475	0.038933	1	0.107143	0.477267
421	B.642780	Marmoricola scoriae	BACTERIA_V3V4	9	2.48355	0.30068	0.003021	0.038874	4	0.166667	0.497876
228	B.1619313	Duffyella gerundensis	BACTERIA_V3V4	8	2.53766	0.310393	0.003191	0.038798	12	0.071429	0.48485
179	B.959	Bdellovibrio bacteriovorus	BACTERIA_V3V4	8	2.78005	0.319595	0.003553	0.038794	13	0.107143	0.483468
97	B.389348	Candidatus Protochlamydia naegleriophila	BACTERIA_V3V4	9	2.33262	0.31281	0.004327	0.038765	5	0.111111	0.493488
313	B.2115978	Candidatus Phycorickettsia trachydisci	BACTERIA_V3V4	8	2.25866	0.317986	0.003862	0.038728	10	0.071429	0.469831
100	B.155925	Nitrosospira sp. NRS527	BACTERIA_V3V4	8	2.32653	0.309958	0.003358	0.038608	13	0.107143	0.475893
384	B.1608957	Euzebya pacifica	BACTERIA_V3V4	10	2.87112	0.310175	0.004998	0.038544	2	0.111111	0.517088
298	B.39122	Skermania piniformis	BACTERIA_V3V4	9	3.17715	0.312147	0.00463	0.038483	1	0.083333	0.497855
222	B.2303331	Solimonas sp. K1W22B-7	BACTERIA_V3V4	9	2.97952	0.315489	0.005019	0.038395	10	0.055556	0.493344
177	B.2937786	Seonamhaeicola sp. ML3	BACTERIA_V3V4	9	2.69123	0.311487	0.004876	0.038305	11	0.027778	0.495209
103	B.303	Pseudomonas putida	BACTERIA_V3V4	8	2.96128	0.312367	0.00324	0.038286	5	0.107143	0.475917
242	B.665099	Cytobacillus oceanisediminis	BACTERIA_V3V4	9	2.04259	0.311707	0.004384	0.038278	6	0.027778	0.489535
343	B.1653478	Rhodococcus sp. PBTS 1	BACTERIA_V3V4	9	2.65349	0.308444	0.003759	0.038153	3	0.166667	0.480982
396	B.208216	Parvularcula bermudensis	BACTERIA_V3V4	8	2.67477	0.323099	0.00463	0.038107	4	0.035714	0.475205
140	B.2908837	Mycolicibacterium sp. YH-1	BACTERIA_V3V4	7	2.763	0.311487	0.002124	0.038066	3	0.190476	0.463317
164	B.2528019	Planctopirus ephydatiae	BACTERIA_V3V4	7	3.07718	0.311487	0.002707	0.037995	10	0.095238	0.459483
114	B.496056	Anseongella ginsenosidimutans	BACTERIA_V3V4	7	2.81565	0.316166	0.002765	0.037983	2	0.047619	0.459995
173	B.29539	Thermoleophilum album	BACTERIA_V3V4	10	2.19992	0.309307	0.004955	0.037962	8	0.133333	0.501388
226	B.591197	Ignavibacterium album	BACTERIA_V3V4	9	2.28914	0.313031	0.004828	0.037794	8	0.083333	0.480393
203	B.2704465	Rhodocytophaga rosea	BACTERIA_V3V4	8	2.52562	0.319134	0.003652	0.037738	6	0.071429	0.470459
2	F.2059318	Histoplasma mississippiense (nom. inval.)	FUNGI	7	2.96735	0.304618	0.001687	0.037591	9	0.238095	0.461399
20	F.51453	Trichoderma reesei	FUNGI	7	2.25484	0.315489	0.002572	0.037557	9	0.047619	0.459301
102	B.254247	Aquicella siphonis	BACTERIA_V3V4	8	2.66372	0.310393	0.003229	0.037504	13	0.142857	0.460938
336	B.2734	Symbiobacterium thermophilum	BACTERIA_V3V4	8	3.2197	0.306306	0.002275	0.037458	12	0.214286	0.472015
116	B.2908642	Solicola gregarius	BACTERIA_V3V4	8	3.52331	0.318903	0.004179	0.037361	6	0.071429	0.468779
389	B.2768162	Roseomonas haemaphysalidis	BACTERIA_V3V4	8	3.55597	0.31083	0.00326	0.037188	0	0.107143	0.457958
63	B.11	Cellulomonas gilvus	BACTERIA_V3V4	9	3.11087	0.306519	0.00356	0.037177	11	0.083333	0.484989
440	B.192421	Chryseobacterium daecheongense	BACTERIA_V3V4	8	2.38973	0.301913	0.002949	0.037175	1	0.107143	0.465774
69	B.48	Archangium gephyra	BACTERIA_V3V4	9	2.1913	0.306519	0.004128	0.037163	11	0.083333	0.465942
405	B.1805827	Rhodococcus sp. MTM3W5.2	BACTERIA_V3V4	9	3.2013	0.310611	0.004053	0.037052	4	0.138889	0.477644
80	B.114	Gemmata obscuriglobus	BACTERIA_V3V4	8	2.33799	0.309741	0.003088	0.037015	7	0.142857	0.472612
415	B.2711231	Roseimicrobium sp. ORNL1	BACTERIA_V3V4	8	1.88191	0.304618	0.002521	0.03691	10	0.25	0.460174
443	B.2596828	Microlunatus elymi	BACTERIA_V3V4	9	3.68792	0.316619	0.004899	0.036904	2	0.055556	0.474216
14	F.301207	Macroventuria anomochaeta	FUNGI	8	3.24433	0.307585	0.003234	0.036827	1	0.107143	0.458304
340	B.162496	Glutamicibacter creatinolyticus	BACTERIA_V3V4	8	3.20242	0.309524	0.003397	0.036816	5	0.142857	0.455973
65	B.167964	Anaerolinea thermophila	BACTERIA_V3V4	8	3.21608	0.307371	0.002546	0.036758	5	0.142857	0.458733
327	B.2067065	Aquella oligotrophica	BACTERIA_V3V4	7	2.4605	0.308229	0.001766	0.036726	10	0.095238	0.444916
231	B.2917724	Nocardioides sp. TF02-7	BACTERIA_V3V4	8	2.72357	0.312367	0.004127	0.036675	10	0.178571	0.47061
272	B.2840457	Nocardioides sp. LMS-CY	BACTERIA_V3V4	9	3.02592	0.30274	0.004491	0.036631	11	0.111111	0.467377
205	B.2704467	Cellulomonas sp. H30R-01	BACTERIA_V3V4	8	2.76721	0.311487	0.003784	0.036617	2	0.071429	0.455789
79	B.94	Stella humosa	BACTERIA_V3V4	8	2.70064	0.317073	0.004369	0.036603	11	0.071429	0.462763
61	B.9	Buchnera aphidicola	BACTERIA_V3V4	8	2.70566	0.315039	0.003522	0.036588	10	0.071429	0.446998
348	B.1796921	Ereboglobus luteus	BACTERIA_V3V4	8	2.55948	0.316166	0.003512	0.036473	0	0.107143	0.451634
210	B.1856685	Pseudomonas sp. TCU-HL1	BACTERIA_V3V4	8	2.93176	0.310611	0.003356	0.036456	2	0.142857	0.460544
353	B.2898796	Nocardioides sp. cx-173	BACTERIA_V3V4	9	3.26488	0.315039	0.005012	0.036239	6	0.055556	0.46796
240	B.1005039	Fimbriimonas ginsengisoli	BACTERIA_V3V4	8	2.31034	0.309958	0.003668	0.036043	2	0.071429	0.457582
433	B.2051957	Rubrobacter indicoceani	BACTERIA_V3V4	7	2.29913	0.311268	0.002495	0.035985	13	0.095238	0.438413
407	B.2932244	Agromyces sp. H17E-10	BACTERIA_V3V4	8	2.78958	0.310393	0.00355	0.035974	10	0.142857	0.453062
274	B.1492898	Flavisolibacter tropicus	BACTERIA_V3V4	7	2.48467	0.31281	0.003081	0.035744	1	0.047619	0.446844
419	B.1670831	Egibacter rhizosphaerae	BACTERIA_V3V4	8	2.53805	0.302947	0.00276	0.035731	5	0.142857	0.437441
43	F.2813651	Orbilia oligospora	FUNGI	10	2.74376	0.303989	0.004508	0.035725	4	0.111111	0.478905
151	B.459472	Planococcus glaciei	BACTERIA_V3V4	8	2.4825	0.306944	0.002857	0.035708	1	0.214286	0.458604
23	F.5481	Diutina rugosa	FUNGI	8	2.68128	0.308659	0.003566	0.035689	1	0.071429	0.447317
267	B.2996035	Sphingobacterium sp. SYP-B4668	BACTERIA_V3V4	8	2.04457	0.309958	0.003532	0.035631	6	0.035714	0.437595
95	B.53461	Nakamurella multipartita	BACTERIA_V3V4	8	2.15783	0.318673	0.004949	0.035504	4	0.035714	0.457305
270	B.575378	Sediminibacterium sp. TEGAF015	BACTERIA_V3V4	8	2.71614	0.309524	0.00394	0.035477	0	0.071429	0.443955
221	B.2802971	Luteitalea sp. TBR-22	BACTERIA_V3V4	7	2.69544	0.312588	0.002881	0.035419	10	0.095238	0.430399
319	B.2607656	Hymenobacter busanensis	BACTERIA_V3V4	8	2.36683	0.305671	0.003019	0.035359	5	0.178571	0.443651
414	B.2653857	Amycolatopsis sp. YIM 10	BACTERIA_V3V4	8	2.18588	0.305882	0.003679	0.035305	8	0.107143	0.444343
72	B.56	Sorangium cellulosum	BACTERIA_V3V4	8	2.63529	0.306944	0.00302	0.035285	3	0.142857	0.449695
49	F.182096	Aspergillus chevalieri	FUNGI	7	3.12108	0.309091	0.00269	0.03527	7	0.142857	0.43836
318	B.264697	Peribacillus muralis	BACTERIA_V3V4	9	3.25129	0.31281	0.004991	0.035207	7	0.111111	0.459233
229	B.3016000	Caulobacter sp. NIBR1757	BACTERIA_V3V4	7	2.92754	0.316846	0.003215	0.035137	6	0	0.429736
302	B.2926907	Abyssalbus ytuae	BACTERIA_V3V4	8	2.59259	0.317301	0.004425	0.034966	6	0.035714	0.438978
25	F.796027	Sugiyamaella lignohabitans	FUNGI	7	2.4112	0.307371	0.002508	0.034884	4	0.047619	0.432604
330	B.2865833	Pseudonocardia sp. DSM 110487	BACTERIA_V3V4	9	3.18064	0.303571	0.004104	0.034873	2	0.083333	0.460678
253	B.435897	Lysobacter capsici	BACTERIA_V3V4	8	2.62293	0.310611	0.003267	0.0348	6	0.107143	0.431022
27	F.40324	Stenotrophomonas maltophilia	FUNGI	7	3.18287	0.307585	0.002298	0.034773	1	0.095238	0.427045
347	B.391953	Aquincola tertiaricarbonis	BACTERIA_V3V4	7	2.35171	0.303571	0.002372	0.034737	4	0.095238	0.434165
295	B.211114	Allokutzneria albata	BACTERIA_V3V4	8	3.02453	0.306306	0.003155	0.034646	7	0.142857	0.445886
232	B.1392	Bacillus anthracis	BACTERIA_V3V4	9	3.11739	0.311927	0.004514	0.034626	7	0.083333	0.450769
257	B.1771	Mycolicibacterium phlei	BACTERIA_V3V4	8	3.60846	0.310611	0.003717	0.034372	6	0.071429	0.436702
293	B.370777	Arenimonas daejeonensis	BACTERIA_V3V4	9	2.20652	0.309524	0.004163	0.034314	6	0.111111	0.450491
279	B.2026	Thermoactinomyces vulgaris	BACTERIA_V3V4	8	1.92856	0.308229	0.00397	0.034183	7	0.178571	0.441931
159	B.2528009	Pirellulimonas nuda	BACTERIA_V3V4	9	2.15564	0.299458	0.003397	0.033988	2	0.138889	0.461971
310	B.182640	Kribbella flavida	BACTERIA_V3V4	7	2.63389	0.306519	0.002282	0.033929	1	0.190476	0.422369
165	B.2528026	Maioricimonas rarisocia	BACTERIA_V3V4	8	2.72059	0.299255	0.00236	0.033819	4	0.214286	0.438303
50	F.4950	Torulaspora delbrueckii	FUNGI	8	2.04371	0.30274	0.003173	0.033697	1	0.035714	0.424628
250	B.2598579	Limnoglobus roseus	BACTERIA_V3V4	9	2.86706	0.30546	0.003918	0.033414	7	0.166667	0.440306
74	B.2596890	Candidatus Uabimicrobium amorphum	BACTERIA_V3V4	7	2.74831	0.307799	0.00234	0.033342	10	0.190476	0.409926
94	B.2822368	Lysobacter luteus	BACTERIA_V3V4	7	2.21864	0.302533	0.002149	0.033193	7	0.285714	0.422161
15	F.280754	Pochonia chlamydosporia	FUNGI	7	2.29105	0.312588	0.003726	0.033175	5	0.142857	0.416081
417	B.2653851	Rubrobacter tropicus	BACTERIA_V3V4	7	2.92428	0.309307	0.002625	0.032846	11	0.142857	0.407338
265	B.1861	Geodermatophilus obscurus	BACTERIA_V3V4	8	2.65039	0.308875	0.003334	0.032674	6	0.107143	0.414434
111	B.2789776	Actinomarinicola tropica	BACTERIA_V3V4	9	3.35667	0.30274	0.003769	0.032639	3	0.166667	0.442772
393	B.1437009	Chenggangzhangella methanolivorans	BACTERIA_V3V4	7	2.38262	0.309958	0.002774	0.032481	8	0	0.401436
172	B.693075	Caldisericum exile	BACTERIA_V3V4	7	3.26983	0.308444	0.002812	0.032467	3	0.095238	0.402878
349	B.1678128	Limnohabitans sp. 63ED37-2	BACTERIA_V3V4	7	2.6592	0.306306	0.002639	0.032458	6	0.095238	0.402177
260	B.79604	Denitrobacterium detoxificans	BACTERIA_V3V4	8	2.30909	0.299255	0.002236	0.032343	5	0.178571	0.405323
359	B.2812896	Leptolyngbya sp. 7M	BACTERIA_V3V4	9	2.51192	0.302533	0.003757	0.03219	2	0.111111	0.440205
268	B.2742204	Methyloligella sp. GL2	BACTERIA_V3V4	9	2.59644	0.308444	0.004919	0.03204	7	0.055556	0.432277
426	B.28447	Clavibacter michiganensis	BACTERIA_V3V4	7	2.71397	0.299864	0.002067	0.032028	11	0.095238	0.411523
317	B.403957	Virgibacillus sp. SK37	BACTERIA_V3V4	8	2.9457	0.302533	0.003273	0.031862	13	0.071429	0.407778
17	F.36050	Fusarium poae	FUNGI	7	3.16277	0.310175	0.002743	0.031754	8	0.047619	0.394783
392	B.871742	Pseudoduganella flava	BACTERIA_V3V4	8	2.91131	0.30068	0.002983	0.031159	5	0.107143	0.399032
127	B.2949664	Paraconexibacter antarcticus	BACTERIA_V3V4	7	3.37018	0.306944	0.002473	0.03093	6	0.047619	0.380699
92	B.2498704	Agromyces sp. LHK192	BACTERIA_V3V4	8	2.36928	0.306731	0.003657	0.03087	1	0.107143	0.396167
370	B.1391653	Vulgatibacter incomptus	BACTERIA_V3V4	8	2.37561	0.302119	0.00351	0.03087	7	0.107143	0.414468
121	B.2732487	Usitatibacter palustris	BACTERIA_V3V4	7	2.49926	0.305038	0.002408	0.030756	2	0	0.382496
381	B.453816	Pseudobdellovibrio exovorus	BACTERIA_V3V4	8	2.54356	0.301706	0.00314	0.030747	7	0.071429	0.405326
56	F.306088	Aspergillus steynii	FUNGI	7	2.14373	0.296644	0.001717	0.03072	5	0.190476	0.381076
153	B.29405	Microlunatus phosphovorus	BACTERIA_V3V4	8	2.69555	0.299053	0.003398	0.03072	0	0.035714	0.386942
83	B.2904252	Lysobacter sp. KIS68-7	BACTERIA_V3V4	7	2.97149	0.30109	0.002501	0.030712	3	0.095238	0.395724
201	B.46165	Actinomadura verrucosospora	BACTERIA_V3V4	8	2.36079	0.308659	0.004833	0.030459	7	0.071429	0.404653
141	B.2884263	Aquihabitans sp. Kera 3	BACTERIA_V3V4	7	3.19957	0.298447	0.002096	0.029993	8	0.190476	0.396796
434	B.1638261	Thermococcus sp. M36	BACTERIA_V3V4	7	3.18333	0.295652	0.001958	0.029799	5	0.190476	0.380426
312	B.117157	Actinopolymorpha singaporensis	BACTERIA_V3V4	8	2.80903	0.299864	0.003118	0.029562	3	0.071429	0.385842
238	B.2897333	Metabacillus sp. B2-18	BACTERIA_V3V4	8	2.32941	0.293883	0.002286	0.029493	1	0.107143	0.384475
425	B.2867005	Mycobacterium sp. IDR2000157661	BACTERIA_V3V4	7	2.11666	0.298649	0.002313	0.029159	3	0.190476	0.382065
161	B.2528023	Urbifossiella limnaea	BACTERIA_V3V4	6	3.35856	0.299864	0.0018	0.029084	13	0.133333	0.364176
157	B.168695	Salinispora tropica	BACTERIA_V3V4	6	2.11905	0.300476	0.001294	0.028989	3	0.266667	0.361995
309	B.2582905	Nocardioides sp. S-1144	BACTERIA_V3V4	6	2.69186	0.305249	0.002346	0.028973	3	0.066667	0.363888
133	B.2708082	Mumia sp. ZJ1417	BACTERIA_V3V4	7	2.07796	0.30274	0.002587	0.028924	6	0.142857	0.379006
332	B.1034889	Variovorax sp. HW608	BACTERIA_V3V4	7	2.18574	0.307158	0.003498	0.028465	6	0.047619	0.360033
200	B.1108	Chloroflexus aurantiacus	BACTERIA_V3V4	7	2.34379	0.291749	0.001916	0.028355	4	0.095238	0.370872
418	B.2653852	Rubrobacter marinus	BACTERIA_V3V4	8	2.82041	0.299661	0.003074	0.028002	11	0.071429	0.371394
33	F.195108	Fusarium falciforme	FUNGI	6	2.83871	0.293103	0.001451	0.027688	0	0.066667	0.337073
91	B.49319	Rubrobacter xylanophilus	BACTERIA_V3V4	7	2.96744	0.293103	0.001565	0.027398	7	0.190476	0.360988
1	F.1196081	Talaromyces amestolkiae	FUNGI	7	2.83446	0.297844	0.002348	0.027221	4	0.142857	0.356211
204	B.492670	Bacillus velezensis	BACTERIA_V3V4	6	2.83522	0.298045	0.001583	0.026493	13	0.133333	0.338271
258	B.1773	Mycobacterium tuberculosis	BACTERIA_V3V4	7	2.74935	0.299053	0.002753	0.025284	7	0.142857	0.334617
184	B.717785	Hyphomicrobium sp. MC1	BACTERIA_V3V4	7	2.39673	0.299255	0.002658	0.024984	2	0.095238	0.332543
220	B.980251	Mariniblastus fucicola	BACTERIA_V3V4	7	2.20196	0.290789	0.001912	0.024555	11	0.190476	0.329252
284	B.3020843	Pseudomonas sp. Q1-7	BACTERIA_V3V4	6	2.53831	0.296048	0.002204	0.024307	7	0.066667	0.321799
188	B.2995142	Pseudoxanthomonas sp. SL93	BACTERIA_V3V4	5	2.46722	0.295455	0.001543	0.022408	12	0	0.280317
271	B.2819978	Cellulomonas fengjieae	BACTERIA_V3V4	6	3.1468	0.293688	0.002262	0.021295	11	0.066667	0.282853
106	B.1704307	Candidatus Xiphinematobacter sp. Idaho Grape	BACTERIA_V3V4	6	2.38383	0.293493	0.001613	0.021203	2	0.133333	0.281612

## Sheet: Co-occurrence_type
Species_1	Species_2	Co-occurrence
1	341	negative
1	249	negative
1	270	negative
1	43	negative
1	312	positive
1	37	positive
1	51	positive
2	264	negative
2	428	negative
2	41	negative
2	156	positive
2	337	positive
2	21	positive
2	14	positive
3	202	negative
3	78	negative
3	443	negative
3	167	negative
3	331	negative
3	334	positive
3	326	positive
3	39	positive
3	23	positive
4	236	negative
4	383	negative
4	129	negative
4	362	negative
4	324	positive
4	133	positive
4	409	positive
4	140	positive
4	263	positive
4	377	positive
4	179	positive
5	388	negative
5	163	negative
5	205	negative
5	325	negative
5	303	negative
5	194	positive
5	210	positive
5	137	positive
5	315	positive
5	293	positive
5	25	positive
6	90	negative
6	147	negative
6	125	negative
6	135	negative
6	365	positive
6	81	positive
6	178	positive
6	403	positive
6	425	positive
6	32	positive
7	370	negative
7	146	negative
7	233	negative
7	153	negative
7	131	negative
7	345	positive
7	149	positive
7	330	positive
7	141	positive
7	304	positive
7	76	positive
8	349	negative
8	148	negative
8	203	negative
8	333	negative
8	393	positive
8	93	positive
8	82	positive
8	19	positive
8	38	positive
9	435	negative
9	109	negative
9	41	negative
9	122	positive
9	371	positive
9	74	positive
9	337	positive
9	214	positive
9	354	positive
9	21	positive
9	12	positive
9	44	positive
10	355	negative
10	228	negative
10	383	negative
10	154	negative
10	162	negative
10	400	negative
10	316	positive
10	389	positive
10	219	positive
11	196	negative
11	216	negative
11	192	negative
11	176	negative
11	412	negative
11	36	negative
11	337	positive
11	288	positive
11	276	positive
11	53	positive
12	357	negative
12	216	negative
12	103	negative
12	41	negative
12	48	negative
12	74	positive
12	203	positive
12	198	positive
12	193	positive
12	9	positive
13	213	negative
13	285	negative
13	379	negative
13	174	negative
13	183	negative
13	115	negative
13	244	negative
13	31	negative
13	299	positive
13	420	positive
13	436	positive
13	52	positive
13	54	positive
14	316	negative
14	218	negative
14	46	negative
14	41	negative
14	265	positive
14	387	positive
14	2	positive
14	50	positive
15	65	negative
15	427	negative
15	429	negative
15	305	negative
15	412	negative
15	329	positive
15	362	positive
16	435	negative
16	110	negative
16	153	negative
16	239	negative
16	213	positive
16	208	positive
16	403	positive
16	294	positive
17	257	negative
17	410	negative
17	346	negative
17	424	negative
17	127	negative
17	86	negative
17	42	positive
18	235	negative
18	307	negative
18	221	negative
18	263	negative
18	399	negative
18	132	positive
18	328	positive
18	264	positive
18	396	positive
18	118	positive
19	387	negative
19	211	negative
19	176	negative
19	229	negative
19	344	negative
19	131	negative
19	132	positive
19	8	positive
19	38	positive
20	81	negative
20	352	negative
20	371	positive
20	366	positive
20	356	positive
20	193	positive
20	28	positive
21	435	negative
21	383	negative
21	327	negative
21	404	negative
21	126	negative
21	70	negative
21	372	negative
21	243	positive
21	354	positive
21	9	positive
21	2	positive
22	390	negative
22	101	negative
22	176	negative
22	242	negative
22	34	negative
22	71	positive
22	329	positive
22	417	positive
22	82	positive
23	235	negative
23	283	negative
23	351	positive
23	120	positive
23	267	positive
23	321	positive
23	3	positive
23	27	positive
24	439	negative
24	379	negative
24	429	negative
24	244	negative
24	277	negative
24	292	negative
24	139	negative
24	160	positive
24	436	positive
24	441	positive
24	29	positive
25	423	negative
25	295	negative
25	192	negative
25	375	positive
25	222	positive
25	68	positive
25	5	positive
26	225	negative
26	85	negative
26	358	negative
26	185	negative
26	27	negative
26	223	positive
26	213	positive
26	275	positive
26	33	positive
27	282	negative
27	401	negative
27	26	negative
27	120	positive
27	109	positive
27	185	positive
27	23	positive
28	212	negative
28	181	negative
28	367	negative
28	122	positive
28	89	positive
28	416	positive
28	175	positive
28	344	positive
28	131	positive
28	432	positive
28	20	positive
29	408	negative
29	314	negative
29	56	negative
29	258	positive
29	436	positive
29	302	positive
29	303	positive
29	24	positive
29	50	positive
30	223	negative
30	423	negative
30	64	negative
30	101	negative
30	140	negative
30	139	negative
30	36	negative
30	157	positive
30	383	positive
30	296	positive
30	437	positive
30	39	positive
31	80	negative
31	96	negative
31	302	negative
31	214	negative
31	189	negative
31	246	negative
31	13	negative
31	256	positive
31	210	positive
31	252	positive
31	209	positive
31	407	positive
32	266	negative
32	383	negative
32	431	negative
32	135	negative
32	277	negative
32	61	negative
32	164	positive
32	441	positive
32	88	positive
32	6	positive
33	110	negative
33	311	negative
33	153	negative
33	45	negative
33	401	positive
33	26	positive
34	417	negative
34	178	negative
34	403	negative
34	22	negative
34	38	negative
34	63	positive
34	420	positive
34	225	positive
34	90	positive
34	412	positive
35	254	negative
35	142	negative
35	416	negative
35	175	negative
35	300	positive
35	376	positive
35	429	positive
35	113	positive
35	187	positive
35	87	positive
35	412	positive
36	337	negative
36	73	negative
36	39	negative
36	11	negative
36	30	negative
36	357	positive
36	295	positive
36	388	positive
36	64	positive
36	290	positive
36	46	positive
37	251	negative
37	136	negative
37	353	negative
37	347	negative
37	380	negative
37	130	negative
37	405	positive
37	60	positive
37	1	positive
38	146	negative
38	100	negative
38	90	negative
38	342	negative
38	192	negative
38	131	negative
38	34	negative
38	102	positive
38	275	positive
38	8	positive
38	19	positive
38	58	positive
39	235	negative
39	440	negative
39	320	negative
39	36	negative
39	157	positive
39	326	positive
39	296	positive
39	197	positive
39	3	positive
39	30	positive
40	63	negative
40	146	negative
40	119	negative
40	43	negative
40	269	positive
40	365	positive
40	82	positive
40	138	positive
40	247	positive
41	208	negative
41	337	negative
41	229	negative
41	9	negative
41	12	negative
41	2	negative
41	14	negative
41	435	positive
41	264	positive
41	216	positive
41	280	positive
41	46	positive
42	90	negative
42	62	negative
42	333	negative
42	185	negative
42	393	positive
42	414	positive
42	283	positive
42	289	positive
42	17	positive
43	200	negative
43	173	negative
43	201	negative
43	76	negative
43	40	negative
43	1	negative
43	370	positive
43	249	positive
43	394	positive
43	95	positive
44	438	negative
44	388	negative
44	171	negative
44	290	negative
44	187	negative
44	411	positive
44	339	positive
44	337	positive
44	195	positive
44	9	positive
45	355	negative
45	371	negative
45	236	negative
45	255	negative
45	315	negative
45	104	negative
45	33	negative
45	58	negative
45	100	positive
45	311	positive
45	388	positive
45	377	positive
45	172	positive
46	122	negative
46	123	negative
46	177	negative
46	14	negative
46	440	positive
46	103	positive
46	219	positive
46	117	positive
46	41	positive
46	36	positive
47	265	negative
47	105	negative
47	253	negative
47	308	positive
47	132	positive
47	269	positive
47	264	positive
47	280	positive
47	281	positive
48	346	negative
48	396	negative
48	148	negative
48	339	negative
48	62	negative
48	214	negative
48	287	negative
48	354	negative
48	12	negative
48	49	positive
49	341	negative
49	296	negative
49	185	negative
49	373	positive
49	275	positive
49	292	positive
49	48	positive
50	440	negative
50	428	negative
50	317	negative
50	277	negative
50	156	positive
50	214	positive
50	14	positive
50	29	positive
51	442	negative
51	266	negative
51	398	negative
51	341	negative
51	90	negative
51	84	negative
51	123	positive
51	338	positive
51	1	positive
52	367	negative
52	398	negative
52	124	negative
52	209	negative
52	182	negative
52	67	negative
52	406	negative
52	391	positive
52	127	positive
52	104	positive
52	13	positive
53	376	negative
53	147	negative
53	290	negative
53	84	negative
53	176	negative
53	412	negative
53	224	positive
53	178	positive
53	11	positive
54	212	negative
54	369	negative
54	340	negative
54	285	negative
54	81	negative
54	403	negative
54	101	negative
54	89	positive
54	239	positive
54	13	positive
55	121	negative
55	431	negative
55	80	positive
55	384	positive
55	254	positive
55	160	positive
55	359	positive
55	138	positive
55	112	positive
55	281	positive
56	419	negative
56	436	negative
56	260	negative
56	29	negative
56	340	positive
56	429	positive
56	219	positive
57	207	negative
57	278	negative
57	389	negative
57	397	negative
57	380	negative
57	130	negative
57	217	negative
57	439	positive
58	100	negative
58	341	negative
58	311	negative
58	45	negative
58	66	positive
58	315	positive
58	275	positive
58	292	positive
58	38	positive
59	213	negative
59	350	negative
59	84	negative
59	150	negative
59	313	positive
59	126	positive
59	168	positive
59	291	positive
60	316	negative
60	245	negative
60	249	negative
60	394	negative
60	128	negative
60	195	negative
60	437	negative
60	380	negative
60	387	positive
60	105	positive
60	107	positive
60	37	positive
61	164	negative
61	221	negative
61	88	negative
61	32	negative
61	327	positive
61	376	positive
61	171	positive
61	98	positive
62	174	negative
62	99	negative
62	105	negative
62	42	negative
62	48	negative
62	90	positive
62	424	positive
62	243	positive
62	189	positive
62	354	positive
62	323	positive
63	181	negative
63	384	negative
63	82	negative
63	426	negative
63	40	negative
63	237	positive
63	272	positive
63	69	positive
63	34	positive
64	236	negative
64	198	negative
64	30	negative
64	295	positive
64	96	positive
64	134	positive
64	290	positive
64	87	positive
64	36	positive
65	434	negative
65	77	negative
65	166	negative
65	126	negative
65	362	negative
65	108	negative
65	15	negative
65	88	positive
66	413	negative
66	264	negative
66	147	negative
66	148	negative
66	118	negative
66	84	negative
66	315	positive
66	58	positive
67	122	negative
67	254	negative
67	175	negative
67	104	negative
67	401	negative
67	52	negative
67	376	positive
67	431	positive
67	174	positive
67	321	positive
68	196	negative
68	278	negative
68	78	negative
68	319	negative
68	205	negative
68	436	negative
68	192	negative
68	344	negative
68	170	positive
68	315	positive
68	304	positive
68	25	positive
69	181	negative
69	102	negative
69	414	negative
69	275	negative
69	63	positive
69	271	positive
69	153	positive
69	85	positive
69	131	positive
70	258	negative
70	409	negative
70	189	negative
70	354	negative
70	21	negative
70	348	positive
70	233	positive
70	407	positive
70	317	positive
70	242	positive
71	116	negative
71	105	negative
71	172	negative
71	179	negative
71	245	positive
71	350	positive
71	356	positive
71	97	positive
71	401	positive
71	226	positive
71	22	positive
72	312	negative
72	171	negative
72	320	negative
72	289	negative
72	249	positive
72	339	positive
72	128	positive
72	83	positive
73	181	negative
73	286	negative
73	295	negative
73	426	negative
73	117	negative
73	283	negative
73	36	negative
73	237	positive
73	296	positive
73	177	positive
73	381	positive
74	407	negative
74	422	negative
74	335	positive
74	163	positive
74	415	positive
74	9	positive
74	12	positive
75	442	negative
75	266	negative
75	124	negative
75	144	negative
75	431	negative
75	430	negative
75	128	negative
75	286	positive
75	399	positive
76	249	negative
76	394	negative
76	363	negative
76	43	negative
76	312	positive
76	345	positive
76	414	positive
76	273	positive
76	141	positive
76	7	positive
77	369	negative
77	65	negative
77	243	negative
77	382	negative
77	422	negative
77	142	positive
77	404	positive
77	416	positive
77	98	positive
77	85	positive
77	108	positive
78	438	negative
78	326	negative
78	68	negative
78	3	negative
78	316	positive
78	308	positive
78	366	positive
78	196	positive
78	90	positive
78	350	positive
78	347	positive
78	344	positive
79	145	negative
79	319	negative
79	205	negative
79	97	negative
79	108	negative
79	246	negative
79	360	positive
79	178	positive
80	408	negative
80	210	negative
80	244	negative
80	31	negative
80	418	positive
80	173	positive
80	246	positive
80	55	positive
81	233	negative
81	135	negative
81	297	negative
81	20	negative
81	54	negative
81	261	positive
81	382	positive
81	155	positive
81	179	positive
81	6	positive
82	63	negative
82	351	negative
82	209	negative
82	272	negative
82	269	positive
82	111	positive
82	359	positive
82	141	positive
82	40	positive
82	8	positive
82	22	positive
83	312	negative
83	208	negative
83	111	negative
83	194	positive
83	197	positive
83	72	positive
83	358	positive
84	254	negative
84	59	negative
84	66	negative
84	168	negative
84	53	negative
84	51	negative
84	212	positive
84	266	positive
84	335	positive
84	376	positive
84	148	positive
84	243	positive
84	167	positive
84	191	positive
84	139	positive
85	212	negative
85	223	negative
85	373	negative
85	234	negative
85	26	negative
85	419	positive
85	77	positive
85	397	positive
85	69	positive
86	190	negative
86	283	negative
86	281	negative
86	17	negative
86	351	positive
86	346	positive
86	133	positive
86	337	positive
86	177	positive
86	241	positive
87	256	negative
87	232	negative
87	236	negative
87	123	negative
87	276	negative
87	64	positive
87	185	positive
87	35	positive
88	413	negative
88	144	negative
88	406	negative
88	61	negative
88	223	positive
88	65	positive
88	409	positive
88	392	positive
88	32	positive
89	212	negative
89	373	negative
89	414	negative
89	379	negative
89	233	positive
89	136	positive
89	397	positive
89	217	positive
89	28	positive
89	54	positive
90	345	negative
90	288	negative
90	42	negative
90	51	negative
90	6	negative
90	38	negative
90	316	positive
90	78	positive
90	62	positive
90	333	positive
90	412	positive
90	34	positive
91	408	negative
91	395	negative
91	258	positive
91	134	positive
91	330	positive
91	173	positive
91	298	positive
92	282	negative
92	384	negative
92	208	negative
92	231	negative
92	188	negative
92	401	negative
92	311	positive
92	271	positive
93	339	negative
93	143	negative
93	381	negative
93	95	negative
93	432	negative
93	241	negative
93	181	positive
93	280	positive
93	8	positive
94	261	negative
94	403	negative
94	138	negative
94	330	negative
94	237	positive
94	279	positive
94	395	positive
95	405	negative
95	93	negative
95	173	negative
95	304	negative
95	341	positive
95	124	positive
95	209	positive
95	43	positive
96	256	negative
96	144	negative
96	276	negative
96	31	negative
96	443	positive
96	64	positive
96	134	positive
96	330	positive
97	340	negative
97	79	negative
97	179	negative
97	71	positive
97	335	positive
97	147	positive
97	129	positive
97	259	positive
97	356	positive
98	102	negative
98	382	negative
98	178	negative
98	117	negative
98	77	positive
98	383	positive
98	374	positive
98	390	positive
98	193	positive
98	61	positive
99	367	negative
99	411	negative
99	382	negative
99	62	negative
99	430	negative
99	128	negative
99	287	negative
99	368	positive
99	176	positive
100	338	negative
100	38	negative
100	58	negative
100	374	positive
100	342	positive
100	209	positive
100	153	positive
100	45	positive
101	254	negative
101	142	negative
101	226	negative
101	281	negative
101	30	negative
101	22	negative
101	54	negative
101	115	positive
101	139	positive
101	179	positive
102	349	negative
102	98	negative
102	153	negative
102	176	negative
102	69	negative
102	178	positive
102	275	positive
102	38	positive
103	296	negative
103	432	negative
103	12	negative
103	202	positive
103	314	positive
103	373	positive
103	429	positive
103	46	positive
104	120	negative
104	182	negative
104	107	negative
104	377	negative
104	67	negative
104	45	negative
104	234	positive
104	255	positive
104	175	positive
104	195	positive
104	114	positive
104	401	positive
104	180	positive
104	52	positive
105	71	negative
105	308	negative
105	62	negative
105	47	negative
105	123	positive
105	387	positive
105	60	positive
105	390	positive
105	364	positive
106	222	negative
106	293	negative
106	335	positive
106	205	positive
106	359	positive
106	184	positive
107	104	negative
107	437	negative
107	180	negative
107	324	positive
107	60	positive
107	376	positive
107	148	positive
107	154	positive
107	400	positive
107	409	positive
107	229	positive
108	65	negative
108	137	negative
108	219	negative
108	422	negative
108	79	negative
108	434	positive
108	77	positive
108	250	positive
108	319	positive
108	400	positive
109	371	negative
109	310	negative
109	208	negative
109	160	negative
109	9	negative
109	334	positive
109	442	positive
109	390	positive
109	431	positive
109	197	positive
109	291	positive
109	27	positive
110	213	negative
110	335	negative
110	294	negative
110	33	negative
110	16	negative
110	361	positive
110	397	positive
110	358	positive
110	206	positive
111	351	negative
111	341	negative
111	83	negative
111	381	negative
111	220	negative
111	286	positive
111	159	positive
111	82	positive
111	425	positive
112	355	negative
112	386	negative
112	257	negative
112	279	negative
112	427	negative
112	399	negative
112	325	positive
112	441	positive
112	184	positive
112	55	positive
113	366	negative
113	423	negative
113	353	negative
113	204	negative
113	283	negative
113	324	positive
113	300	positive
113	391	positive
113	375	positive
113	287	positive
113	35	positive
114	211	negative
114	121	negative
114	209	negative
114	115	negative
114	104	positive
114	247	positive
114	422	positive
115	278	negative
115	125	negative
115	437	negative
115	114	negative
115	331	negative
115	281	negative
115	13	negative
115	154	positive
115	101	positive
115	244	positive
116	71	negative
116	152	negative
116	417	negative
116	203	negative
116	380	negative
116	354	negative
116	305	positive
116	321	positive
117	355	negative
117	279	negative
117	225	negative
117	98	negative
117	73	negative
117	240	positive
117	212	positive
117	181	positive
117	403	positive
117	191	positive
117	219	positive
117	46	positive
118	66	negative
118	399	negative
118	180	negative
118	413	positive
118	328	positive
118	434	positive
118	163	positive
118	203	positive
118	182	positive
118	18	positive
119	365	negative
119	199	negative
119	40	negative
119	215	positive
119	386	positive
119	167	positive
119	169	positive
119	135	positive
119	238	positive
119	151	positive
120	386	negative
120	234	negative
120	104	negative
120	334	positive
120	328	positive
120	182	positive
120	27	positive
120	23	positive
121	240	negative
121	443	negative
121	114	negative
121	331	negative
121	55	negative
121	376	positive
121	321	positive
122	314	negative
122	67	negative
122	46	negative
122	371	positive
122	436	positive
122	344	positive
122	9	positive
122	28	positive
123	202	negative
123	295	negative
123	167	negative
123	87	negative
123	191	negative
123	46	negative
123	105	positive
123	288	positive
123	51	positive
124	435	negative
124	399	negative
124	75	negative
124	52	negative
124	398	positive
124	301	positive
124	95	positive
124	150	positive
124	130	positive
125	223	negative
125	115	negative
125	6	negative
125	316	positive
125	437	positive
125	421	positive
125	239	positive
125	227	positive
126	65	negative
126	339	negative
126	243	negative
126	137	negative
126	241	negative
126	21	negative
126	419	positive
126	166	positive
126	59	positive
126	364	positive
126	404	positive
127	247	negative
127	17	negative
127	300	positive
127	302	positive
127	214	positive
127	253	positive
127	52	positive
128	312	negative
128	60	negative
128	99	negative
128	75	negative
128	132	positive
128	157	positive
128	380	positive
128	72	positive
128	130	positive
128	323	positive
128	227	positive
129	222	negative
129	133	negative
129	263	negative
129	352	negative
129	4	negative
129	230	positive
129	282	positive
129	145	positive
129	268	positive
129	97	positive
130	228	negative
130	300	negative
130	253	negative
130	37	negative
130	57	negative
130	124	positive
130	249	positive
130	128	positive
130	301	positive
130	380	positive
130	150	positive
131	367	negative
131	285	negative
131	7	negative
131	19	negative
131	38	negative
131	368	positive
131	307	positive
131	192	positive
131	333	positive
131	344	positive
131	69	positive
131	28	positive
132	235	negative
132	386	negative
132	410	negative
132	128	positive
132	291	positive
132	226	positive
132	227	positive
132	18	positive
132	19	positive
132	47	positive
133	129	negative
133	268	negative
133	332	positive
133	156	positive
133	241	positive
133	86	positive
133	4	positive
134	194	negative
134	360	negative
134	144	negative
134	301	negative
134	228	positive
134	258	positive
134	64	positive
134	96	positive
134	229	positive
134	91	positive
135	343	negative
135	365	negative
135	199	negative
135	81	negative
135	6	negative
135	32	negative
135	266	positive
135	147	positive
135	165	positive
135	119	positive
135	421	positive
136	261	negative
136	409	negative
136	37	negative
136	89	positive
136	233	positive
136	336	positive
136	416	positive
136	255	positive
136	347	positive
136	217	positive
137	328	negative
137	250	negative
137	364	negative
137	126	negative
137	400	negative
137	303	negative
137	108	negative
137	408	positive
137	424	positive
137	427	positive
137	395	positive
137	5	positive
138	256	negative
138	370	negative
138	279	negative
138	94	negative
138	261	positive
138	286	positive
138	443	positive
138	330	positive
138	40	positive
138	55	positive
139	254	negative
139	168	negative
139	24	negative
139	30	negative
139	230	positive
139	440	positive
139	379	positive
139	428	positive
139	101	positive
139	84	positive
139	174	positive
139	244	positive
140	424	negative
140	437	negative
140	180	negative
140	30	negative
140	343	positive
140	172	positive
140	4	positive
141	370	negative
141	427	negative
141	363	negative
141	82	positive
141	173	positive
141	76	positive
141	7	positive
142	305	negative
142	155	negative
142	101	negative
142	321	negative
142	179	negative
142	35	negative
142	77	positive
142	366	positive
142	404	positive
142	231	positive
142	260	positive
143	439	negative
143	93	negative
143	322	negative
143	373	negative
143	187	negative
143	207	positive
143	164	positive
143	402	positive
143	221	positive
143	397	positive
143	385	positive
143	217	positive
144	299	negative
144	286	negative
144	96	negative
144	134	negative
144	186	negative
144	88	negative
144	75	negative
144	334	positive
144	431	positive
144	362	positive
144	406	positive
145	398	negative
145	306	negative
145	402	negative
145	79	negative
145	383	positive
145	322	positive
145	162	positive
145	129	positive
145	231	positive
145	246	positive
146	200	negative
146	261	negative
146	425	negative
146	170	negative
146	304	negative
146	40	negative
146	7	negative
146	38	negative
146	374	positive
146	233	positive
146	432	positive
147	66	negative
147	170	negative
147	53	negative
147	6	negative
147	413	positive
147	218	positive
147	264	positive
147	165	positive
147	135	positive
147	259	positive
147	97	positive
148	66	negative
148	372	negative
148	292	negative
148	8	negative
148	48	negative
148	349	positive
148	398	positive
148	84	positive
148	191	positive
148	107	positive
149	252	negative
149	216	negative
149	192	negative
149	329	positive
149	158	positive
149	162	positive
149	415	positive
149	273	positive
149	338	positive
149	287	positive
149	7	positive
150	405	negative
150	59	negative
150	201	negative
150	124	positive
150	336	positive
150	353	positive
150	198	positive
150	130	positive
150	276	positive
151	215	positive
151	282	positive
151	218	positive
151	366	positive
151	440	positive
151	167	positive
151	353	positive
151	119	positive
152	405	negative
152	305	negative
152	116	negative
152	293	negative
152	399	negative
152	308	positive
152	413	positive
152	423	positive
152	203	positive
152	259	positive
152	191	positive
153	102	negative
153	33	negative
153	16	negative
153	7	negative
153	100	positive
153	272	positive
153	69	positive
153	220	positive
154	316	negative
154	216	negative
154	247	negative
154	10	negative
154	183	positive
154	267	positive
154	107	positive
154	115	positive
155	366	negative
155	142	negative
155	336	negative
155	259	negative
155	416	negative
155	188	negative
155	193	negative
155	432	negative
155	81	positive
156	218	negative
156	320	negative
156	297	negative
156	204	negative
156	372	negative
156	133	positive
156	337	positive
156	177	positive
156	385	positive
156	2	positive
156	50	positive
157	320	negative
157	296	positive
157	309	positive
157	128	positive
157	39	positive
157	30	positive
158	307	negative
158	363	negative
158	328	positive
158	149	positive
158	162	positive
158	163	positive
158	415	positive
158	273	positive
158	294	positive
159	194	negative
159	237	negative
159	262	negative
159	220	negative
159	384	positive
159	111	positive
159	359	positive
159	330	positive
159	190	positive
160	428	negative
160	390	negative
160	109	negative
160	277	negative
160	224	positive
160	417	positive
160	354	positive
160	55	positive
160	24	positive
161	236	negative
161	198	negative
161	193	negative
161	343	positive
161	261	positive
161	441	positive
162	316	negative
162	361	negative
162	164	negative
162	10	negative
162	248	positive
162	322	positive
162	345	positive
162	158	positive
162	145	positive
162	149	positive
162	338	positive
162	288	positive
163	194	negative
163	180	negative
163	5	negative
163	335	positive
163	211	positive
163	158	positive
163	118	positive
163	74	positive
163	171	positive
163	294	positive
164	439	negative
164	375	negative
164	162	negative
164	61	negative
164	307	positive
164	143	positive
164	32	positive
165	200	negative
165	405	negative
165	186	negative
165	218	positive
165	251	positive
165	147	positive
165	135	positive
165	421	positive
166	65	negative
166	219	negative
166	383	positive
166	322	positive
166	327	positive
166	396	positive
166	250	positive
166	126	positive
166	291	positive
167	123	negative
167	3	negative
167	308	positive
167	282	positive
167	218	positive
167	274	positive
167	440	positive
167	350	positive
167	84	positive
167	119	positive
167	151	positive
168	386	negative
168	84	negative
168	244	negative
168	193	negative
168	139	negative
168	59	positive
168	291	positive
169	328	negative
169	329	negative
169	199	negative
169	182	negative
169	235	positive
169	386	positive
169	238	positive
169	119	positive
170	413	negative
170	146	negative
170	147	negative
170	319	negative
170	203	negative
170	259	negative
170	347	negative
170	222	positive
170	392	positive
170	68	positive
171	332	negative
171	194	negative
171	411	negative
171	363	negative
171	437	negative
171	72	negative
171	44	negative
171	388	positive
171	163	positive
171	400	positive
171	61	positive
172	71	negative
172	346	negative
172	356	negative
172	343	positive
172	313	positive
172	140	positive
172	45	positive
173	363	negative
173	95	negative
173	43	negative
173	80	positive
173	338	positive
173	330	positive
173	141	positive
173	298	positive
173	91	positive
173	246	positive
174	433	negative
174	62	negative
174	195	negative
174	380	negative
174	13	negative
174	379	positive
174	320	positive
174	67	positive
174	139	positive
175	438	negative
175	212	negative
175	367	negative
175	290	negative
175	67	negative
175	35	negative
175	255	positive
175	104	positive
175	28	positive
176	245	negative
176	102	negative
176	195	negative
176	53	negative
176	11	negative
176	19	negative
176	22	negative
176	211	positive
176	99	positive
176	303	positive
177	181	negative
177	373	negative
177	268	negative
177	46	negative
177	156	positive
177	265	positive
177	73	positive
177	267	positive
177	86	positive
178	396	negative
178	225	negative
178	376	negative
178	98	negative
178	302	negative
178	34	negative
178	102	positive
178	276	positive
178	247	positive
178	79	positive
178	53	positive
178	6	positive
179	71	negative
179	142	negative
179	97	negative
179	401	negative
179	81	positive
179	101	positive
179	385	positive
179	4	positive
180	163	negative
180	118	negative
180	199	negative
180	140	negative
180	182	negative
180	303	negative
180	107	negative
180	435	positive
180	424	positive
180	427	positive
180	104	positive
180	395	positive
180	372	positive
180	422	positive
181	63	negative
181	370	negative
181	177	negative
181	73	negative
181	69	negative
181	28	negative
181	393	positive
181	269	positive
181	93	positive
181	117	positive
182	202	negative
182	299	negative
182	169	negative
182	234	negative
182	104	negative
182	399	negative
182	180	negative
182	52	negative
182	367	positive
182	118	positive
182	120	positive
182	406	positive
183	435	negative
183	233	negative
183	307	negative
183	216	negative
183	297	negative
183	239	negative
183	13	negative
183	285	positive
183	154	positive
183	403	positive
183	273	positive
183	294	positive
184	210	negative
184	427	negative
184	106	positive
184	418	positive
184	359	positive
184	112	positive
184	226	positive
185	378	negative
185	283	negative
185	292	negative
185	49	negative
185	42	negative
185	26	negative
185	324	positive
185	311	positive
185	87	positive
185	333	positive
185	377	positive
185	358	positive
185	27	positive
186	256	negative
186	266	negative
186	374	negative
186	144	negative
186	165	negative
186	378	negative
186	406	negative
186	224	positive
186	405	positive
187	143	negative
187	416	negative
187	188	negative
187	276	negative
187	44	negative
187	438	positive
187	228	positive
187	322	positive
187	225	positive
187	35	positive
188	92	negative
188	305	negative
188	155	negative
188	187	negative
188	255	positive
189	348	negative
189	390	negative
189	209	negative
189	70	negative
189	406	negative
189	31	negative
189	371	positive
189	391	positive
189	346	positive
189	243	positive
189	62	positive
189	214	positive
190	262	negative
190	430	negative
190	284	negative
190	293	negative
190	241	negative
190	86	negative
190	295	positive
190	159	positive
190	268	positive
190	325	positive
190	281	positive
191	123	negative
191	212	positive
191	306	positive
191	148	positive
191	152	positive
191	84	positive
191	117	positive
192	248	negative
192	326	negative
192	149	negative
192	382	negative
192	304	negative
192	287	negative
192	68	negative
192	11	negative
192	38	negative
192	25	negative
192	196	positive
192	131	positive
193	361	negative
193	161	negative
193	155	negative
193	168	negative
193	247	negative
193	230	positive
193	362	positive
193	98	positive
193	432	positive
193	12	positive
193	20	positive
194	159	negative
194	163	negative
194	171	negative
194	134	negative
194	360	positive
194	83	positive
194	363	positive
194	197	positive
194	284	positive
194	5	positive
195	60	negative
195	174	negative
195	176	negative
195	433	positive
195	424	positive
195	255	positive
195	104	positive
195	437	positive
195	44	positive
196	288	negative
196	68	negative
196	11	negative
196	308	positive
196	278	positive
196	78	positive
196	192	positive
196	297	positive
196	239	positive
197	223	negative
197	282	negative
197	335	negative
197	423	negative
197	211	negative
197	194	positive
197	262	positive
197	109	positive
197	83	positive
197	397	positive
197	352	positive
197	39	positive
198	357	negative
198	161	negative
198	64	negative
198	280	negative
198	331	negative
198	150	positive
198	276	positive
198	432	positive
198	12	positive
199	251	negative
199	394	negative
199	169	negative
199	135	negative
199	119	negative
199	297	negative
199	180	negative
199	343	positive
199	441	positive
199	377	positive
200	146	negative
200	165	negative
200	342	negative
200	421	negative
200	43	negative
200	365	positive
200	425	positive
201	370	negative
201	408	negative
201	251	negative
201	318	negative
201	150	negative
201	43	negative
201	343	positive
201	250	positive
202	326	negative
202	123	negative
202	362	negative
202	182	negative
202	3	negative
202	243	positive
202	103	positive
202	219	positive
202	331	positive
203	116	negative
203	170	negative
203	8	negative
203	423	positive
203	152	positive
203	350	positive
203	118	positive
203	12	positive
204	156	negative
204	113	negative
204	230	positive
204	238	positive
204	320	positive
204	317	positive
205	210	negative
205	321	negative
205	79	negative
205	68	negative
205	5	negative
205	106	positive
205	443	positive
205	436	positive
206	315	negative
206	244	negative
206	110	positive
206	278	positive
206	404	positive
206	325	positive
206	280	positive
206	239	positive
207	439	negative
207	234	negative
207	292	negative
207	57	negative
207	341	positive
207	306	positive
207	402	positive
207	143	positive
207	358	positive
208	311	negative
208	92	negative
208	109	negative
208	83	negative
208	41	negative
208	310	positive
208	365	positive
208	403	positive
208	273	positive
208	298	positive
208	16	positive
209	433	negative
209	82	negative
209	234	negative
209	189	negative
209	114	negative
209	401	negative
209	52	negative
209	100	positive
209	390	positive
209	95	positive
209	31	positive
210	80	negative
210	205	negative
210	280	negative
210	184	negative
210	232	positive
210	244	positive
210	31	positive
210	5	positive
211	360	negative
211	222	negative
211	197	negative
211	437	negative
211	114	negative
211	247	negative
211	323	negative
211	19	negative
211	230	positive
211	423	positive
211	163	positive
[truncated: 2,201 more rows]

## Sheet: Metadata
Ecological interpretation of co-occurrence network metrics
	Network_metrics.ITS_V1V2 dataset
		Node_ID	Node identification within the network, equivalent to an OTU
		Label	OTU ID
		Taxonomy	Taxonomic assignment at the species level
		Group	Main group of the given OTU (Fungi / Bacteria)
		Degree_centrality	Co-occurrence frequency of an node with others in the network
		Weighted_degree_centrality	Co-occurrence frequency of an node with others in the network, taking into account the number of co-occurrences between OTU pairs (i.e., analogous to interaction intensity)
		Closeness_centrality	This metric measures how central is a node along the entire network
		Betweeness_centrality	This metric measures the frequency of a node that interconnects other two nodes in the network
		Keystone	An score that quantifies the relative importance of a node to conduct into an extinction cascade effect when it is eliminated from the network
		Module_ID	The module a node belongs in
		Clustering_coefficient	This metric measures the capacity of a node to cluster with others, i.e., the contribution of an OTU to aggregate other OTUs in sub-communities within the metacommunity
		Eigenvector_centrality	This metric measures the contribution of a node to construct the co-occurrence network outcome
	Co-occurrence_type
		Species_1	Node_ID from the Network_metrics dataset
		Species_2	Node_ID from the Network_metrics dataset
		Co-occurrence	Positive (co-occurrence) or negative (co-exclusion)
